# Supplementary material for: Bisphosphine catalyzed sequential [3 + 2] cycloaddition and Michael addition of ynones with benzylidenepyrazolones via dual α′,α′-C(sp3)–H bifunctionalization to construct cyclopentanone-fused spiro-pyrazolones
Source: Royal Society of Chemistry journal article supplement (doi:10.1039/c8ob02675k), 2018-01-01
Supplement: c8ob02675k1.pdf [file c8ob02675k1.pdf]

## Supporting Information

### **Bisphosphine Catalyzed Sequential [3+2] Cycloaddition and **Michael** Addition of Ynones with Benzyldenepyrazolones *via* Dual $\alpha',\alpha'$ -C(sp<sup>3</sup>)-H Bifunctionalization to Construct Cyclopentanone-fused Spiro-Pyrazolones**

Jiayong Zhang,<sup>a</sup> and Zhiwei Miao<sup>a,b\*</sup>

<sup>a</sup> State Key Laboratory and Institute of Elemento-Organic Chemistry, College of Chemistry, Nankai University, Weijin Road 94, Tianjin 300071, People's Republic of China

Fax: (+86)-22-2350-2351; e-mail: miaoziwei@nankai.edu.cn

<sup>b</sup> Collaborative Innovation Center of Chemical Science and Engineering (Tianjin), Tianjin 300071, People's Republic of China

## List of contents (pages)

|                                                                                                                      |     |
|----------------------------------------------------------------------------------------------------------------------|-----|
| 1. General comments.....                                                                                             | S2  |
| 2. General procedure for the synthesis of ynones <b>1</b> .....                                                      | S3  |
| 3. General procedure for the synthesis of benzylidenepyrazolone <b>2</b> .....                                       | S3  |
| 4. General procedure for the synthesis of bisphosphine catalysts.....                                                | S4  |
| 5. Characterization data for the ynones <b>1</b> .....                                                               | S5  |
| 6. The <sup>1</sup> H and <sup>13</sup> C NMR spectra of compounds <b>1</b> .....                                    | S6  |
| 7. The <sup>1</sup> H and <sup>13</sup> C NMR spectra of compounds <b>3</b> , <b>4</b> , <b>5</b> and <b>7</b> ..... | S10 |
| 8. General procedure for deuteration experiment.....                                                                 | S38 |
| 7. X-ray crystallographic data of compounds <b>3a</b> and <b>4h</b> .....                                            | S39 |
| 8. References.....                                                                                                   | S42 |

### General Comments.

All reactions were performed under N<sub>2</sub> atmosphere in oven-dried glassware with magnetic stirring. Solvents were dried and distilled prior to use according to the standard methods. Unless otherwise indicated, all materials were obtained from commercial sources, and used as purchased without dehydration. Flash column chromatography was performed on silica gel (particle size 10-40 μm, Ocean Chemical Factory of Qingdao, China). Nitrogen gas (99.999%) was purchased from Boc Gas Inc. <sup>1</sup>H NMR and <sup>13</sup>C NMR spectra were recorded in CDCl<sub>3</sub> at Bruker 400 MHz spectrometers, TMS served as internal standard (δ = 0 ppm) for <sup>1</sup>H NMR and <sup>13</sup>C NMR. The crystal structure was determined on a Bruker SMART 1000 CCD diffractometer. Mass spectra were obtained using an electrospray ionization (ESI-TOF) mass spectrometer. Melting points were determined on a T-4 melting point apparatus.

## General procedure for the synthesis of ynones **1**<sup>[1]</sup>

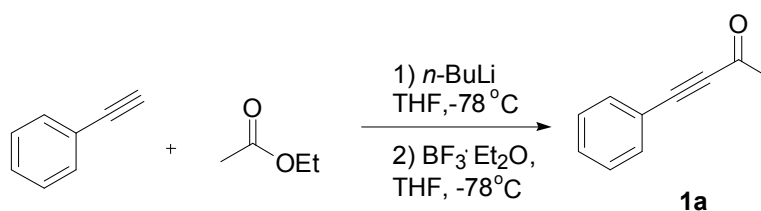

To a 100 mL flame-dried Schlenk tube were added phenyl acetylene (255 mg, 2.50 mmol) and 40 mL dry THF. The mixture was cooled to -78 °C and *n*-BuLi (1.1 mL, 3.0 mmol, 2.75 M in hexane solution) was added slowly and the mixture left to stir for 30 min at -78 °C. Then EtOAc (265 mg, 3.0 mmol) in 20 mL dry THF was added over 10 min followed by addition of  $\text{BF}_3 \cdot \text{Et}_2\text{O}$  (0.40 mL, 390 mg, 2.75 mmol). The mixture was kept at -78 °C for 30 min before being allowed to warm to room temperature. After 30 min the mixture was quenched with 10 mL saturated  $\text{NH}_4\text{Cl}(\text{aq})$ . Following extraction with EtOAc (3 × 20 mL). The organic phase was washed with 20 mL brine and dried over  $\text{Na}_2\text{SO}_4$  and the solvent was removed in vacuo. The crude product was purified by column chromatography (PE/EA = 20/1) to give 4-phenylbut-3-yn-2-one **1a** as a brown oil (331.6 mg, 89% yield).

## General procedure for the synthesis of benzylidenepyrazolone **2**<sup>[2]</sup>

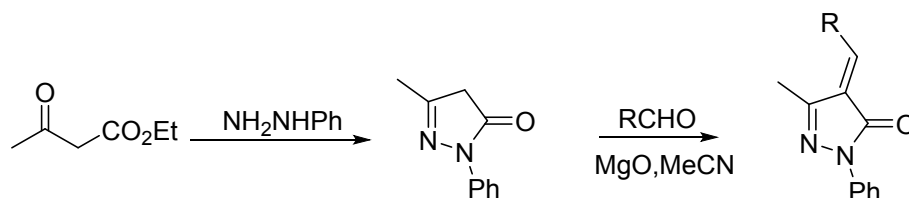

Phenyl hydrazine (10.5 mL, 0.1 mol) was taken in 40 mL of glacial acetic acid and methyl acetoacetate (12.7 mL, 0.1 mol) was added to it and stirred at reflux for 3 h. Thereafter the reaction mixture was evaporated to dryness and to the residue was extracted with water (40 mL) and EtOAc (40 mL). The organic layer was separated whereas the aqueous layer was further extracted with EtOAc (2 × 40 mL). The combined organic layer was dried over anhydrous  $\text{Na}_2\text{SO}_4$  and concentrated over reduced pressure to afford pure product as a white solid.

A mixture of the corresponding aldehyde (19.9 mmol), 3-methyl-1-phenyl-1H-pyrazol-5(4H)-one (19.7 mmol),  $\text{MgO}$  (0.5g) in 40 mL acetonitrile was refluxed with stirring overnight. The progress of the reaction was monitored by TLC. After completion of the reaction,  $\text{MgO}$  was separated from the reaction

mixture by filtration. The excess acetonitrile was removed by evaporation, The combined extracting was concentrated and the residue was subjected to column chromatography to provide the crude product, and recrystallized from 95% ethanol.

### General procedure for the synthesis of bisphosphine catalysts

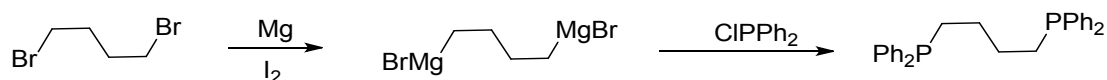

### Synthesis of 1,4-bis(diphenylphosphino)butane (DPPB):<sup>[3]</sup>

To a solution of a small crystal of iodine in THF (50 mL) was added of magnesium (69 mol, 1.67 g) under N<sub>2</sub>. After stirred for about 5 minutes, a solution of 1,4-dibromobutane (24 mmol, 2.9 mL) in THF (50 mL) was added dropwise slowly. After stirred for 3h, a mixture of chlorodiphenylphosphine (40 mmol, 7.2 mL) in 50 mL of anhydrous THF was dropwise added over 30 minutes at 0 °C. Then the reaction mixture was allowed to be warmed up to room temperature and stirred overnight. The resulting mixture was carefully evaporated to remove most of the solvent, then 5 mL of water was added dropwise. The mixture was filtered, and the water layer was extracted by CH<sub>2</sub>Cl<sub>2</sub> (3 × 30 mL). The combined organic layer was dried over anhydrous Na<sub>2</sub>SO<sub>4</sub> and the residue was subjected to column chromatography to provide the product as a white solid. <sup>1</sup>H NMR (300 MHz, CDCl<sub>3</sub>): δ 7.34-7.44 (8 H, m), 7.30-7.33 (12 H, m), 2.04 (4 H, t, J = 7.5 Hz), 1.62-1.54 (4 H, m). <sup>31</sup>P NMR (81 MHz, CDCl<sub>3</sub>): δ -16.6 ppm.

## Characterization data for the ynones

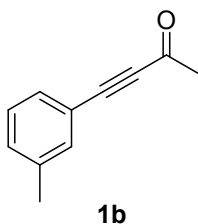

**4-(m-tolyl)but-3-yn-2-one (1b):** Eluent: petroleum ether (PE)/EtOAc (20:1). Yield: 89% (352 mg). Brown oil.  $^1\text{H}$  NMR (400 MHz,  $\text{CDCl}_3$ )  $\delta$  7.30 (s, 2H), 7.17 (s, 2H), 2.35 (s, 3H), 2.26 (s, 3H);  $^{13}\text{C}$  NMR (101 MHz,  $\text{CDCl}_3$ )  $\delta$  184.6, 138.5, 133.5, 131.7, 130.2, 128.5, 119.7, 90.7, 88.1, 32.7, 21.1.

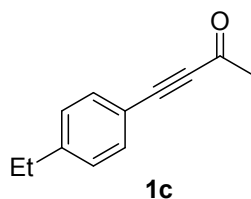

**4-(4-ethylphenyl)but-3-yn-2-one (1c):** Eluent: petroleum ether (PE)/EtOAc (20:1). Yield: 84% (362 mg). Brown oil.  $^1\text{H}$  NMR (400 MHz,  $\text{CDCl}_3$ )  $\delta$  7.50 (d,  $J = 8.0$  Hz, 2H), 7.22 (d,  $J = 7.9$  Hz, 2H), 2.68 (q,  $J = 7.6$  Hz, 2H), 2.45 (s, 3H), 1.25 (t,  $J = 7.6$  Hz, 3H);  $^{13}\text{C}$  NMR (101 MHz,  $\text{CDCl}_3$ )  $\delta$  184.7, 147.7, 133.2, 128.3, 116.9, 91.1, 88.2, 77.4, 77.1, 76.8, 32.7, 29.0, 15.2.

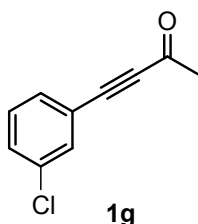

**4-(3-chlorophenyl)but-3-yn-2-one (1g):** Eluent: petroleum ether (PE)/EtOAc (20:1). Yield: 76% (340 mg). Brown oil.  $^1\text{H}$  NMR (400 MHz,  $\text{CDCl}_3$ )  $\delta$  7.56 (t,  $J = 1.7$  Hz, 1H), 7.48-7.38 (m, 2H), 7.33 (t,  $J = 7.9$  Hz, 1H), 2.46 (s, 3H);  $^{13}\text{C}$  NMR (101 MHz,  $\text{CDCl}_3$ )  $\delta$  183.3, 133.5, 131.6, 129.9, 130.1, 128.9, 120.6, 87.7, 87.1, 31.7.

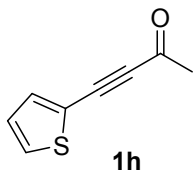

**4-(thiophen-2-yl)but-3-yn-2-one (1h):** Eluent: petroleum ether (PE)/EtOAc (20:1). Yield: 83% (311mg). Brown oil.  $^1\text{H}$  NMR (400 MHz,  $\text{CDCl}_3$ )  $\delta$  7.60-7.36 (m, 2H), 6.98 (dd,  $J = 5.1, 3.8$  Hz, 1H), 2.34 (s, 3H).  $^{13}\text{C}$  NMR (101 MHz,  $\text{CDCl}_3$ )  $\delta$  184.0, 136.8, 131.8, 127.8, 119.6, 92.9, 84.3, 32.4.

## The $^1\text{H}$ and $^{13}\text{C}$ NMR spectra of compounds

zjy-20170917-CH3-403  
PROTON

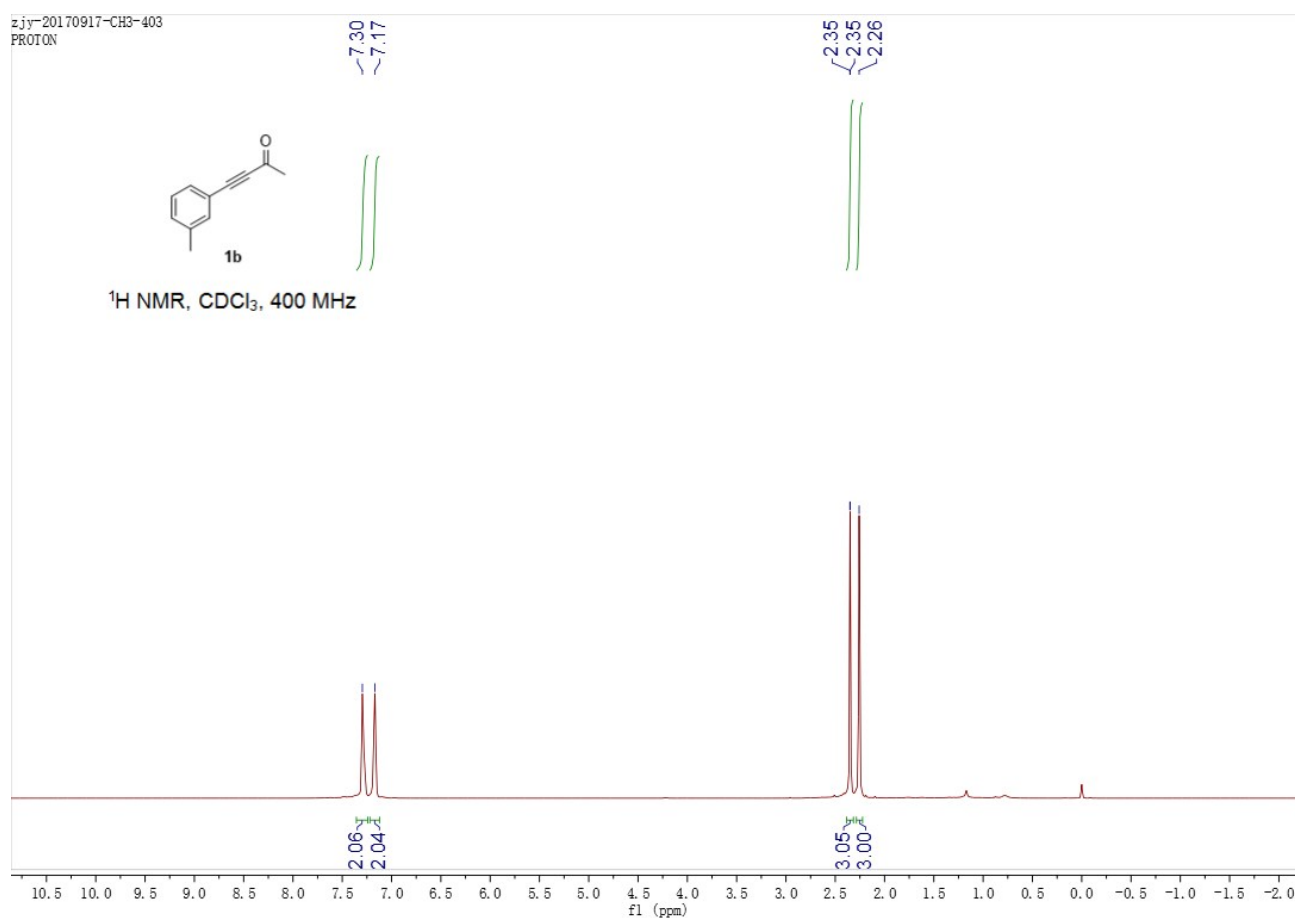

zjy-20170917-CH3-403  
C13CPD

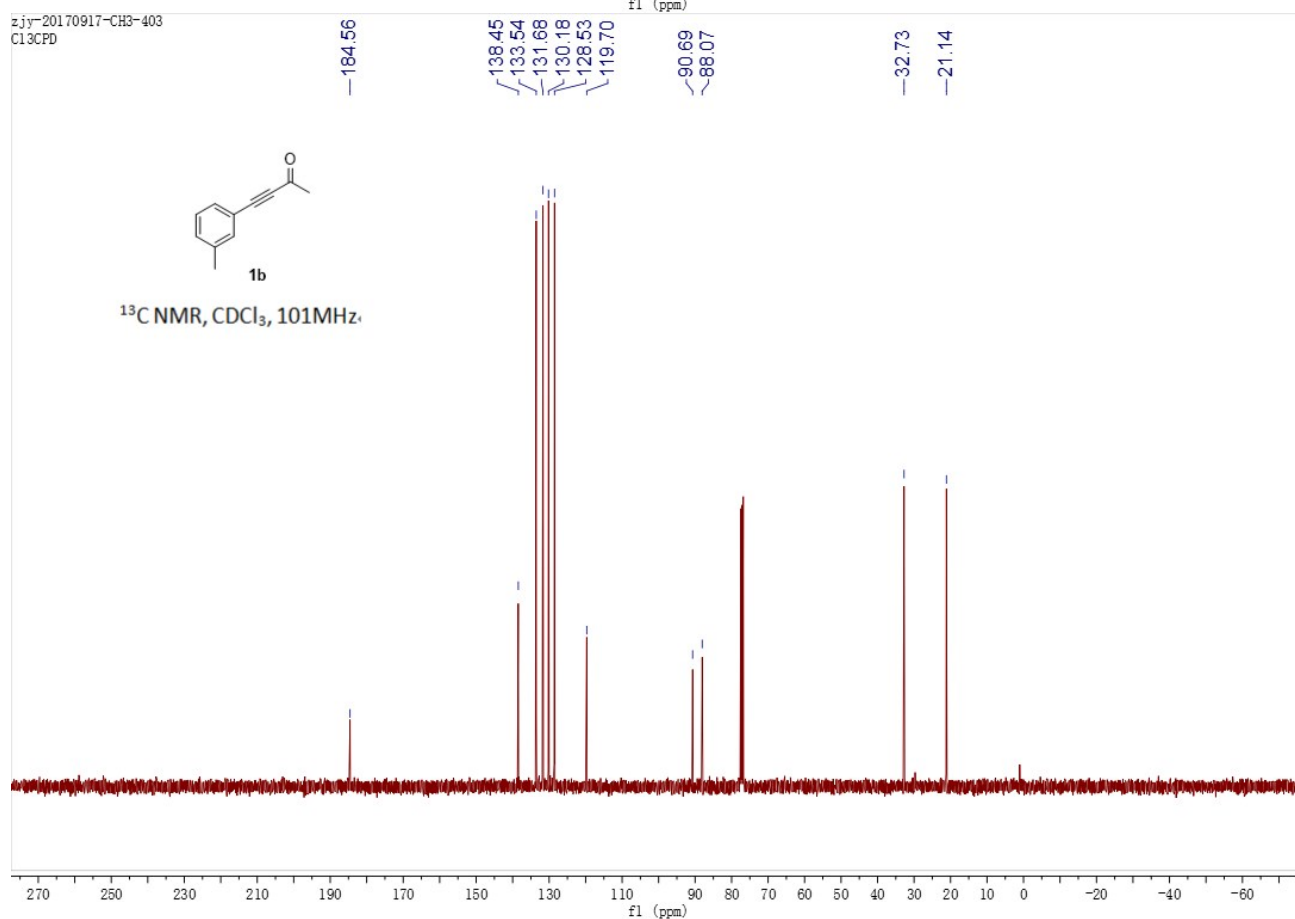

zjy-20160504-2-406  
test

7.51  
7.49  
7.23  
7.21

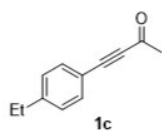

$^1\text{H}$  NMR,  $\text{CDCl}_3$ , 400 MHz

2.71  
2.69  
2.67  
2.65  
2.45

1.27  
1.25  
1.23

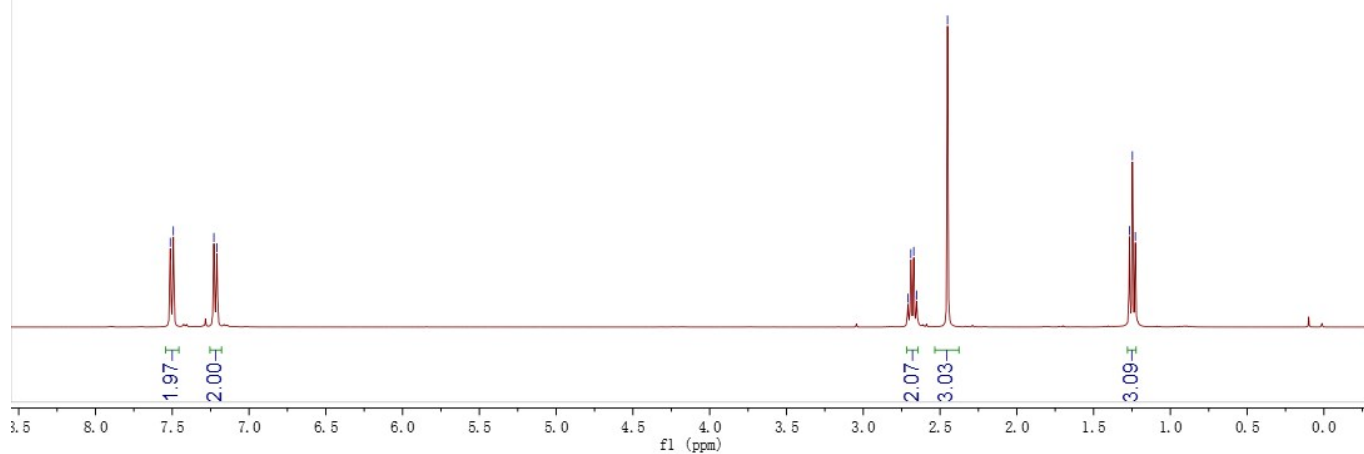

zjy-20160504-2-406  
test

184.70

147.69

133.23

128.27

116.98

91.05

88.16

32.73

29.00

15.17

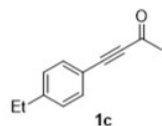

$^{13}\text{C}$  NMR,  $\text{CDCl}_3$ , 101 MHz

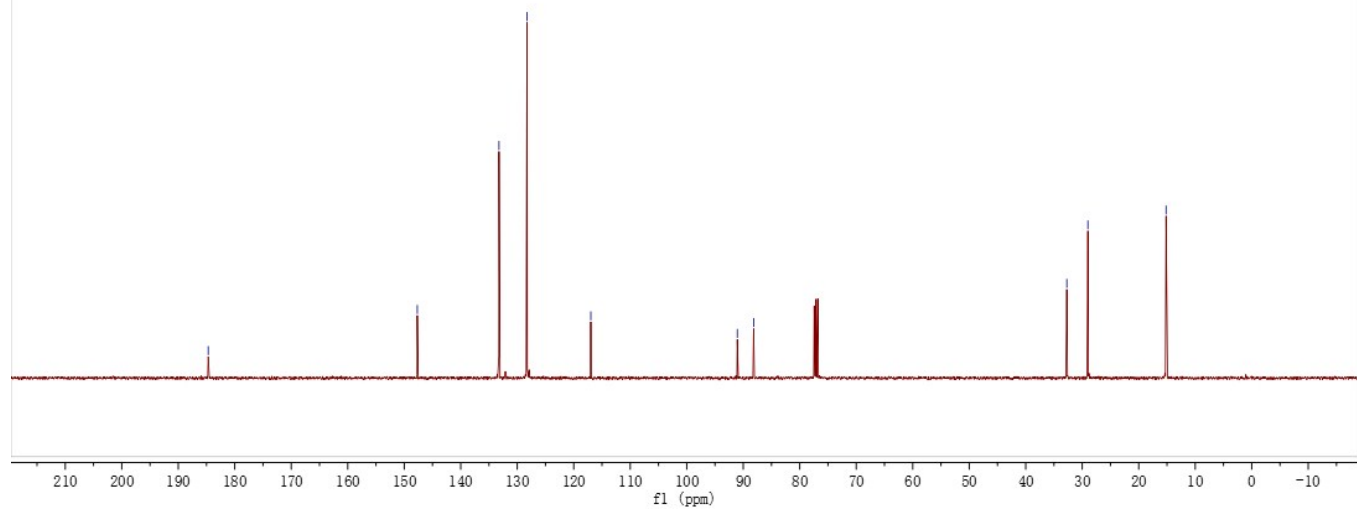

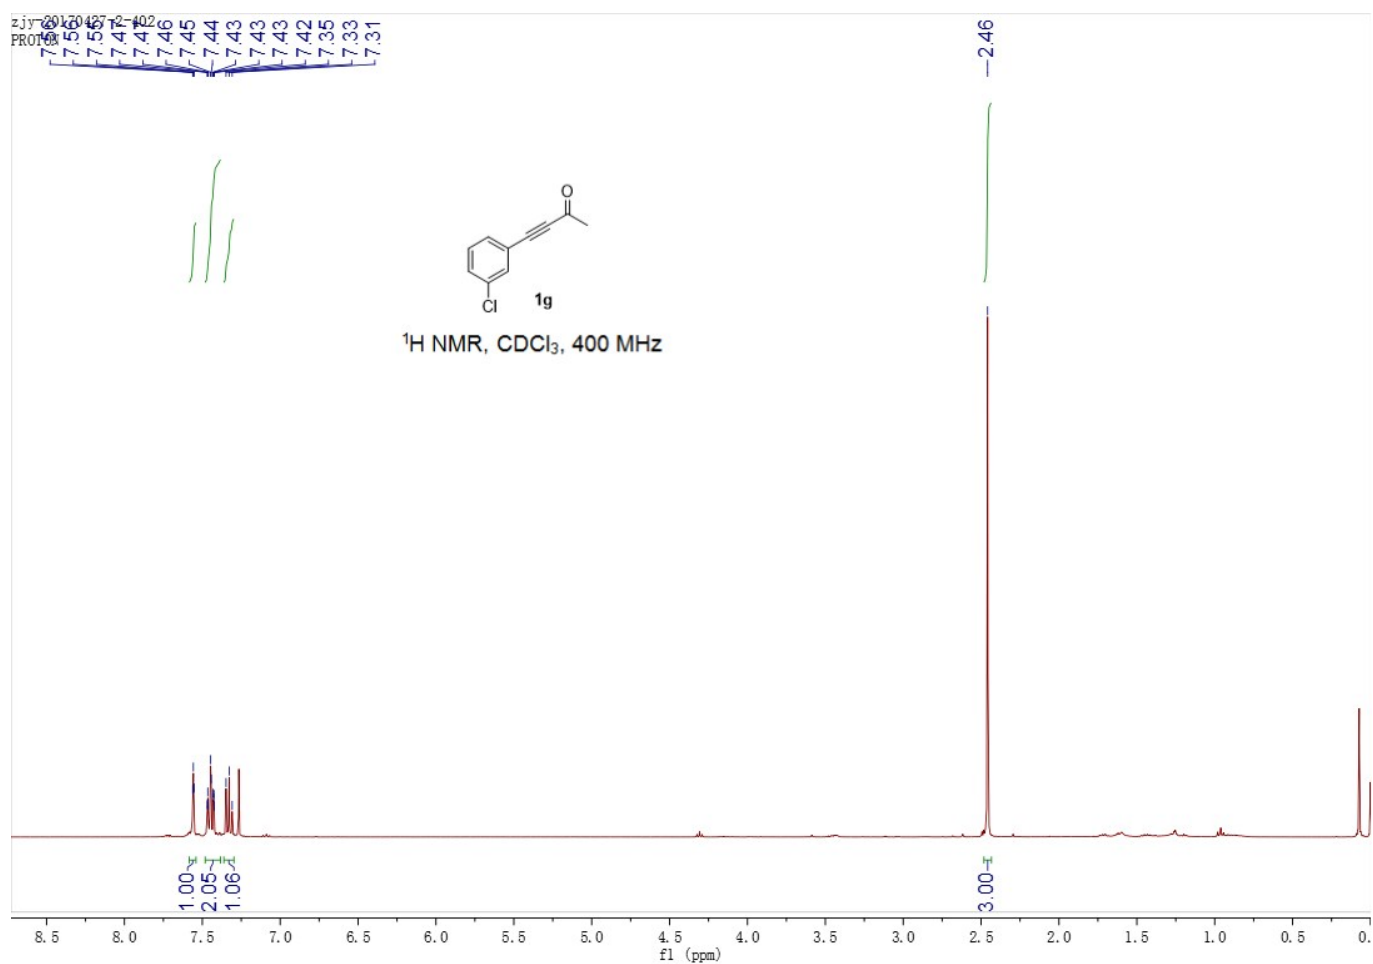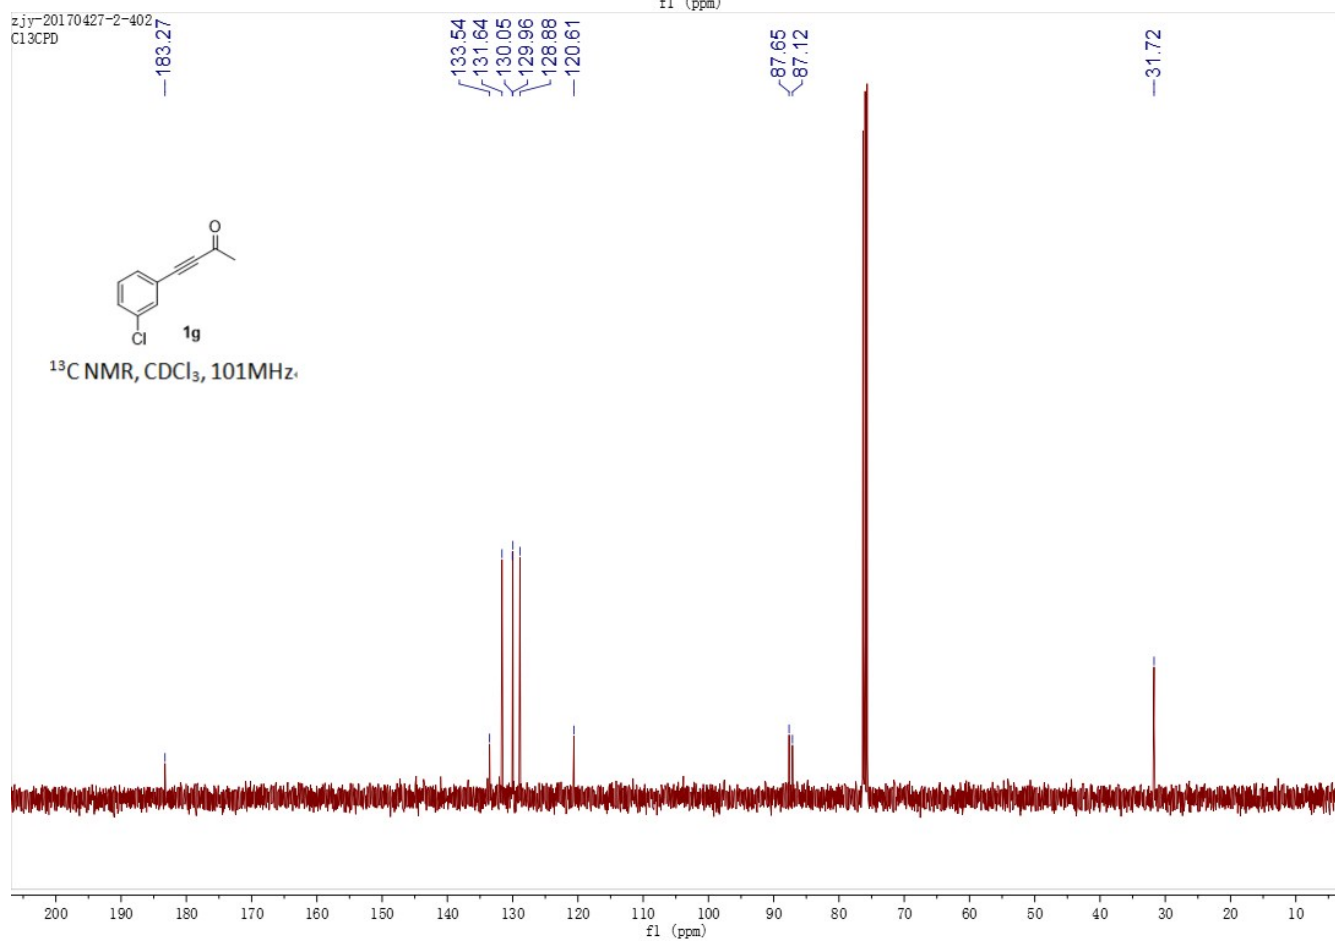



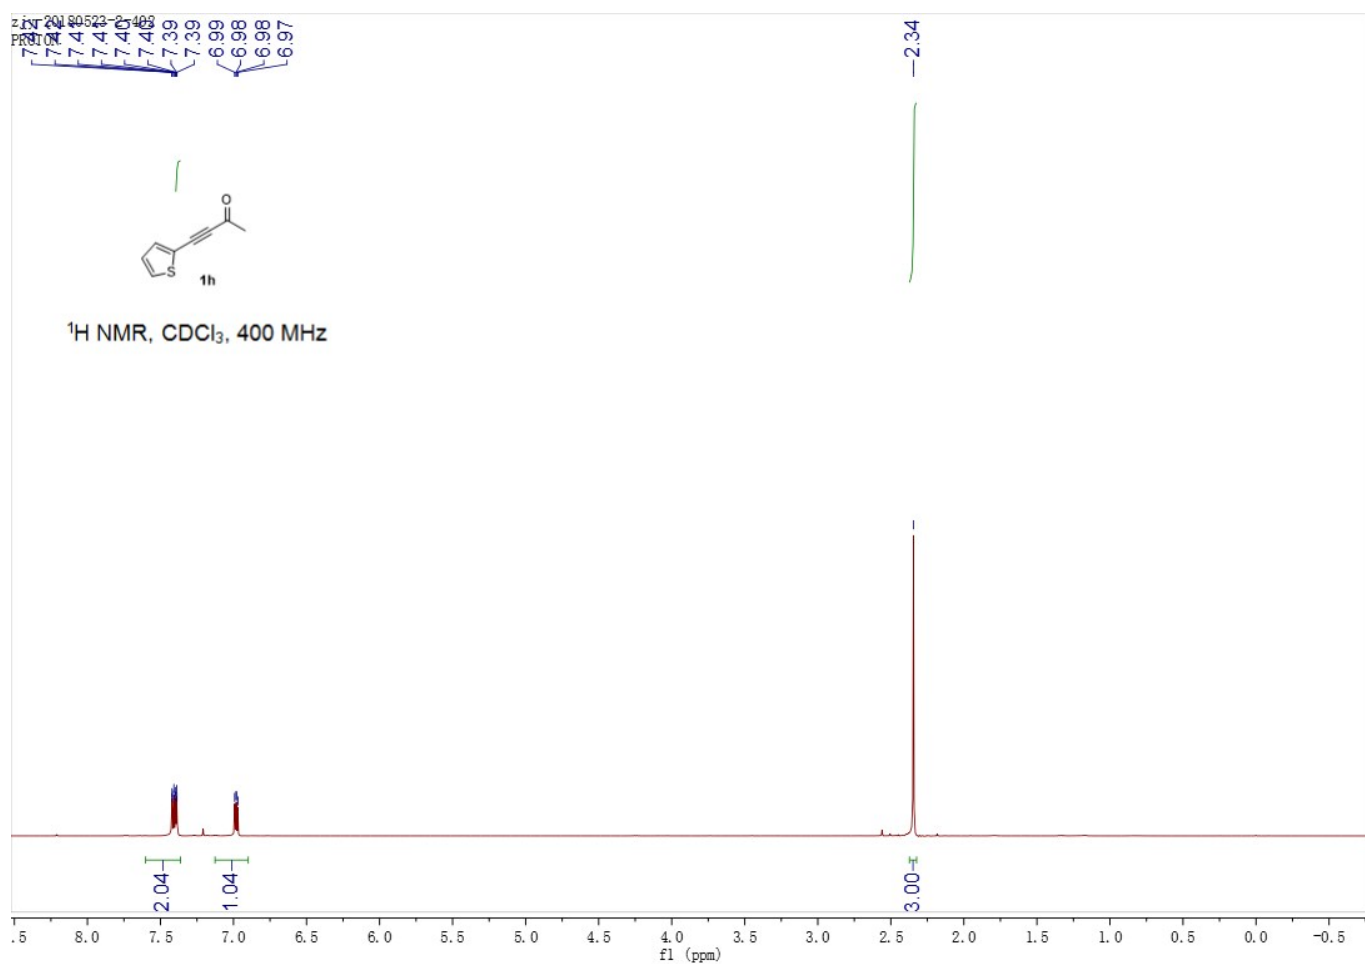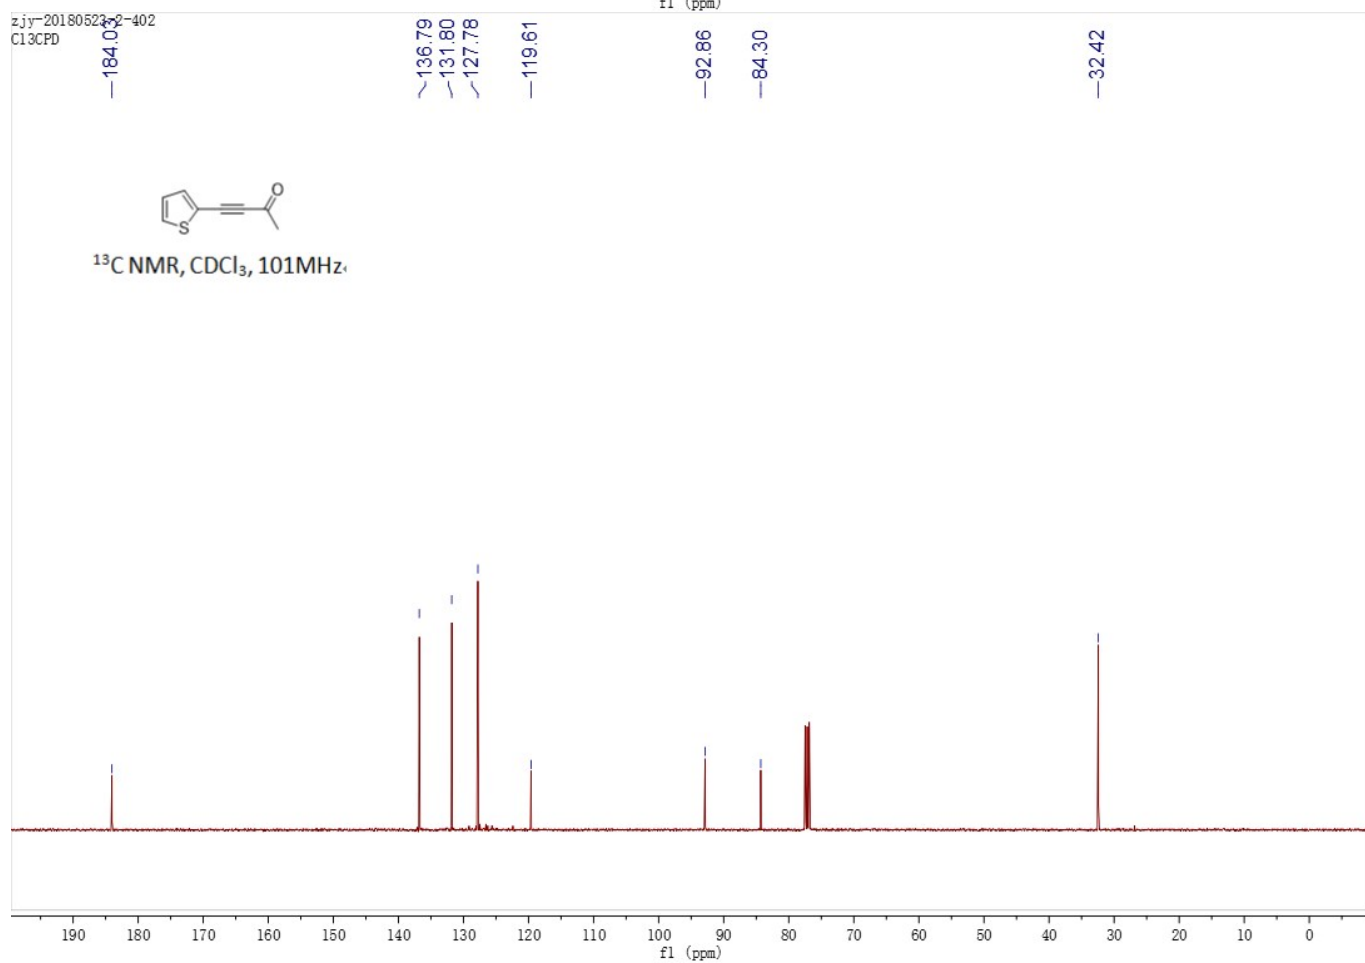

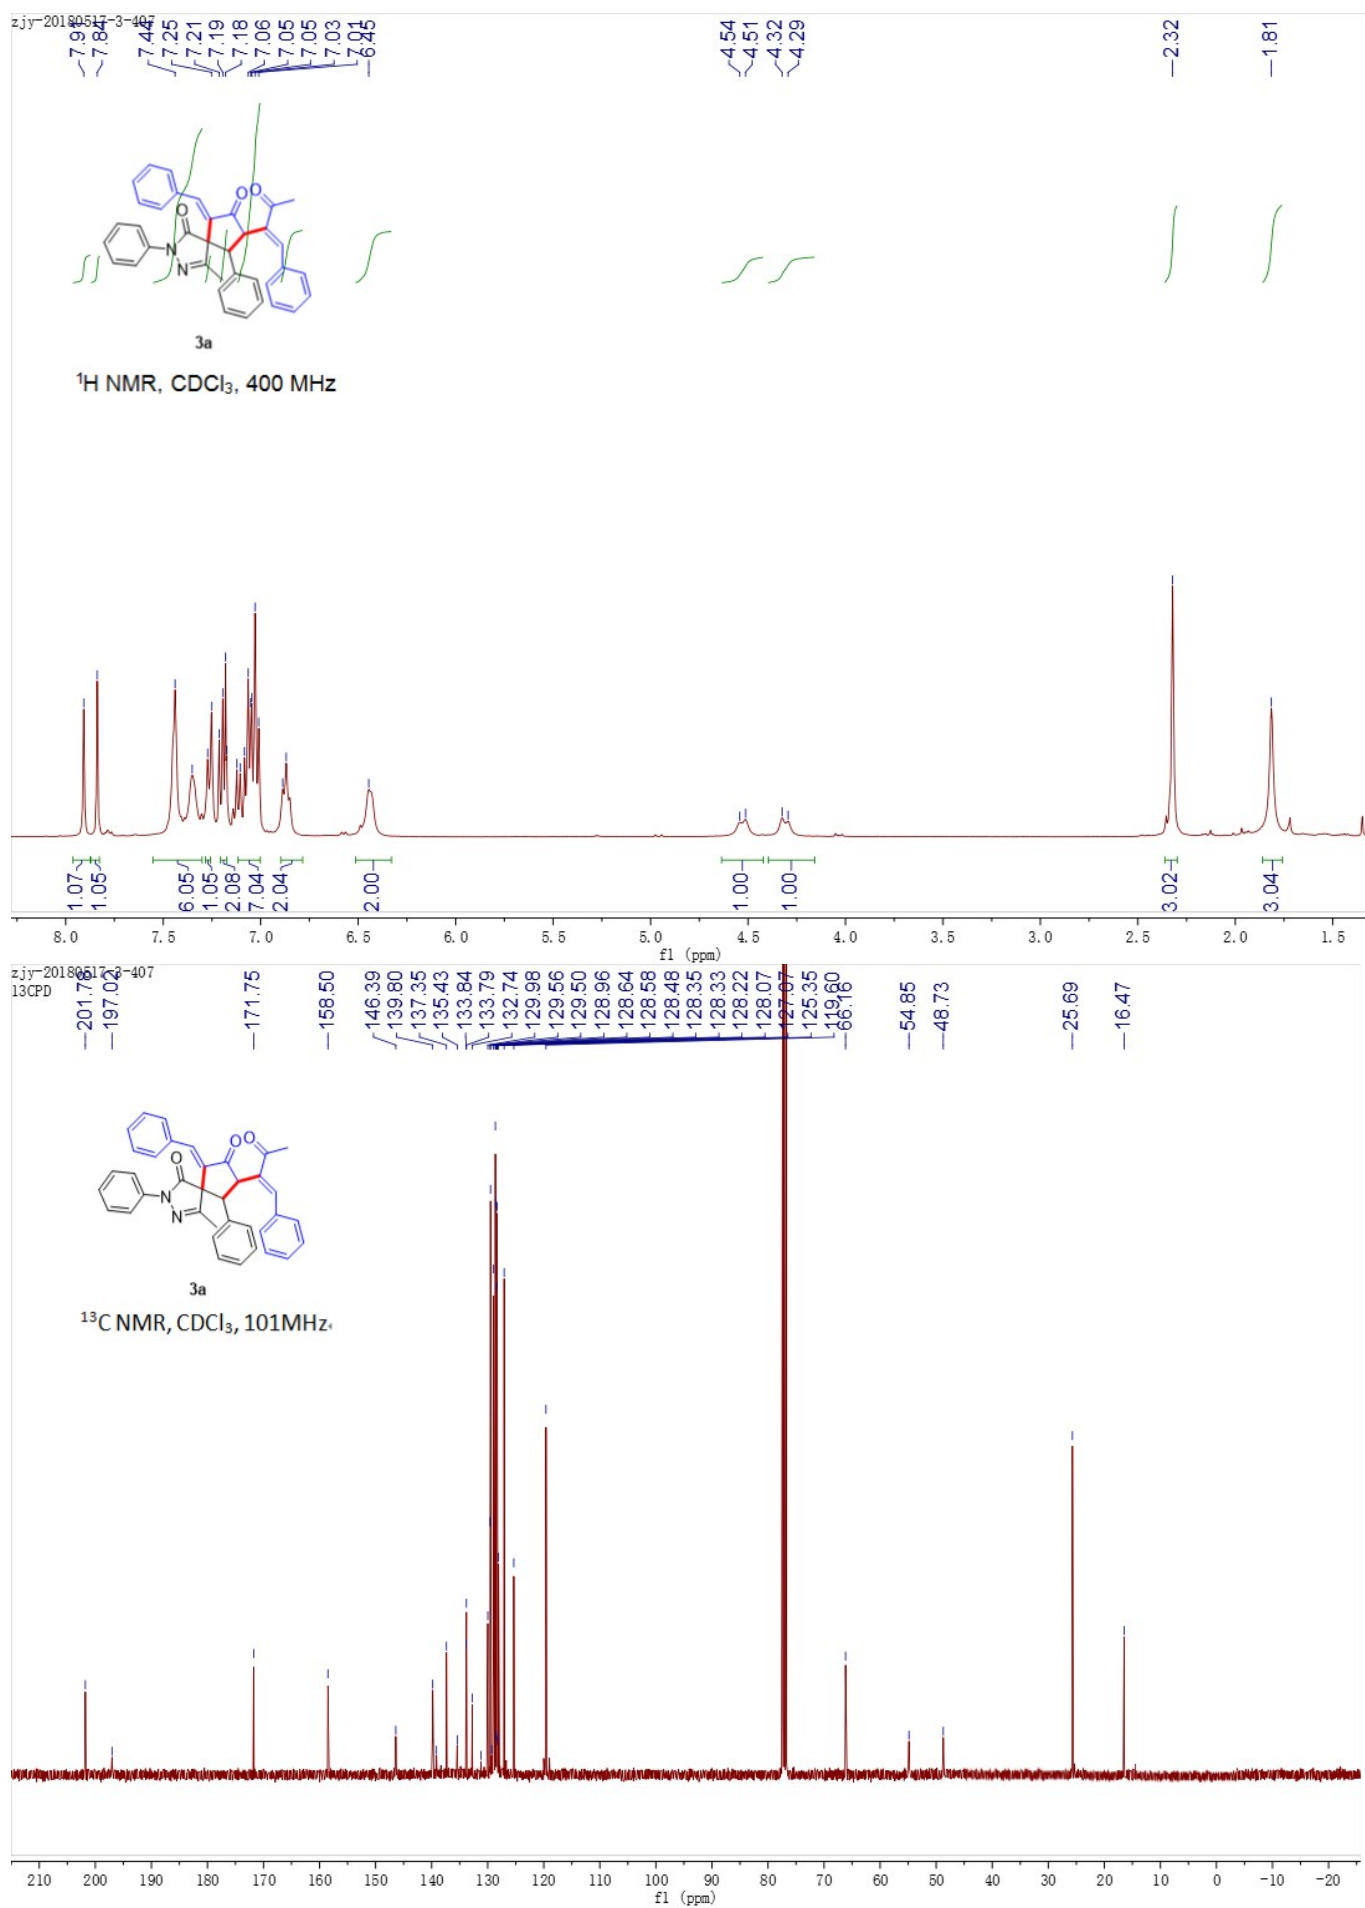

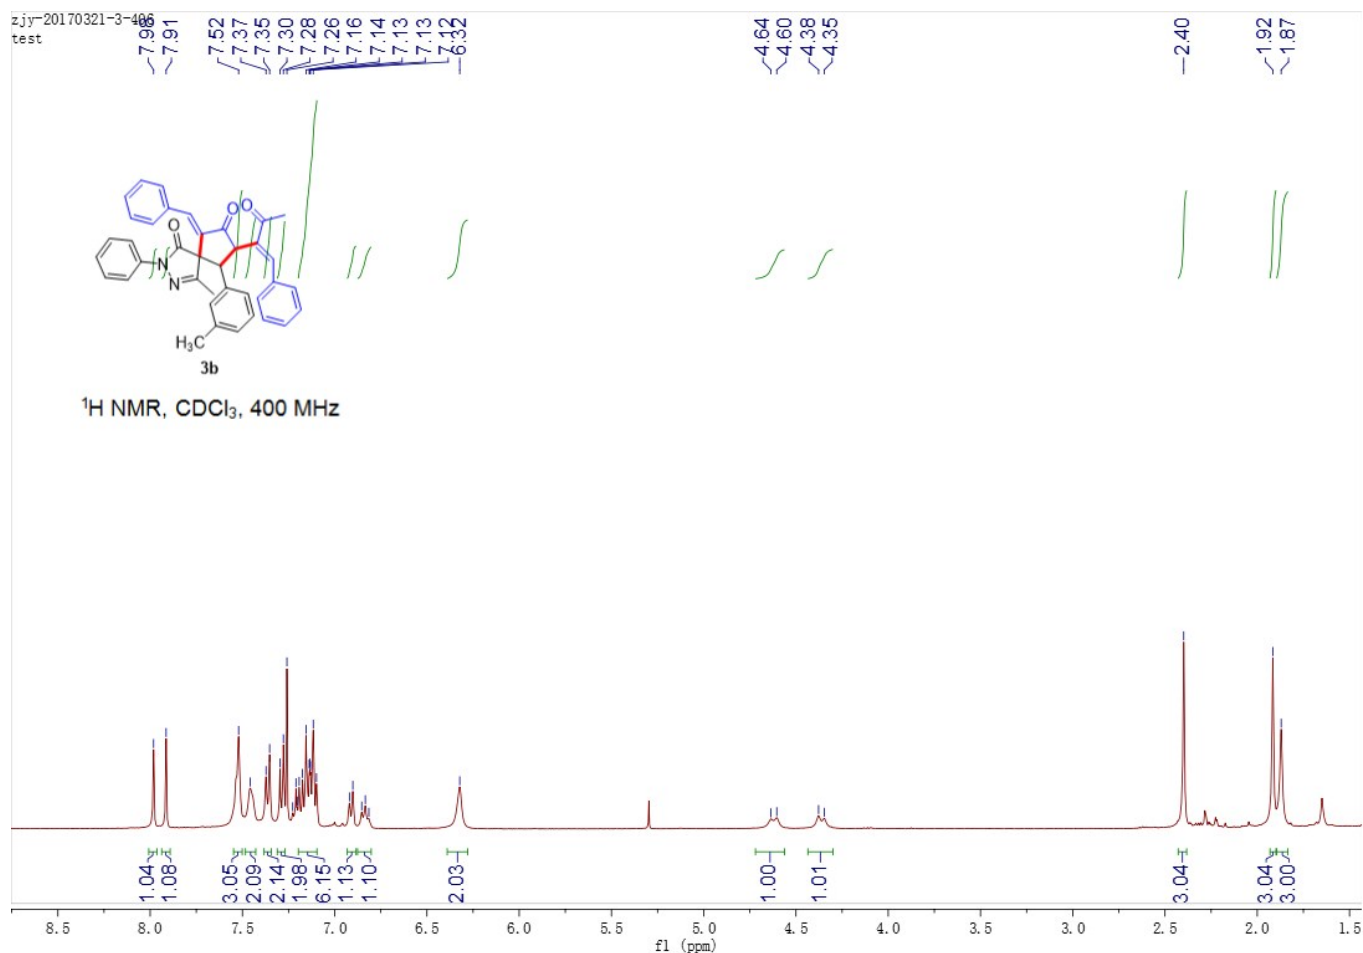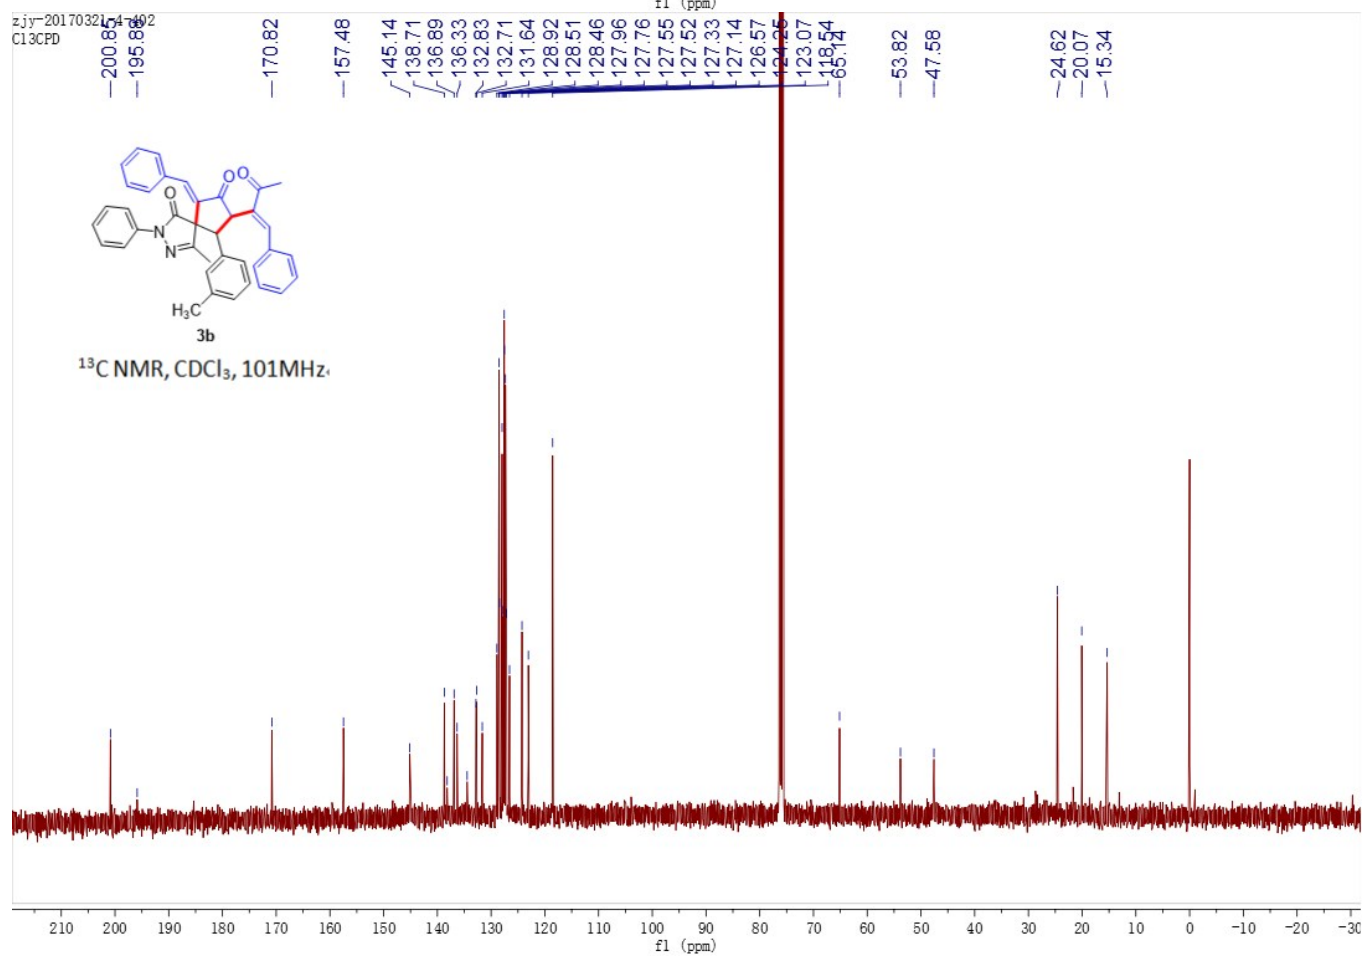

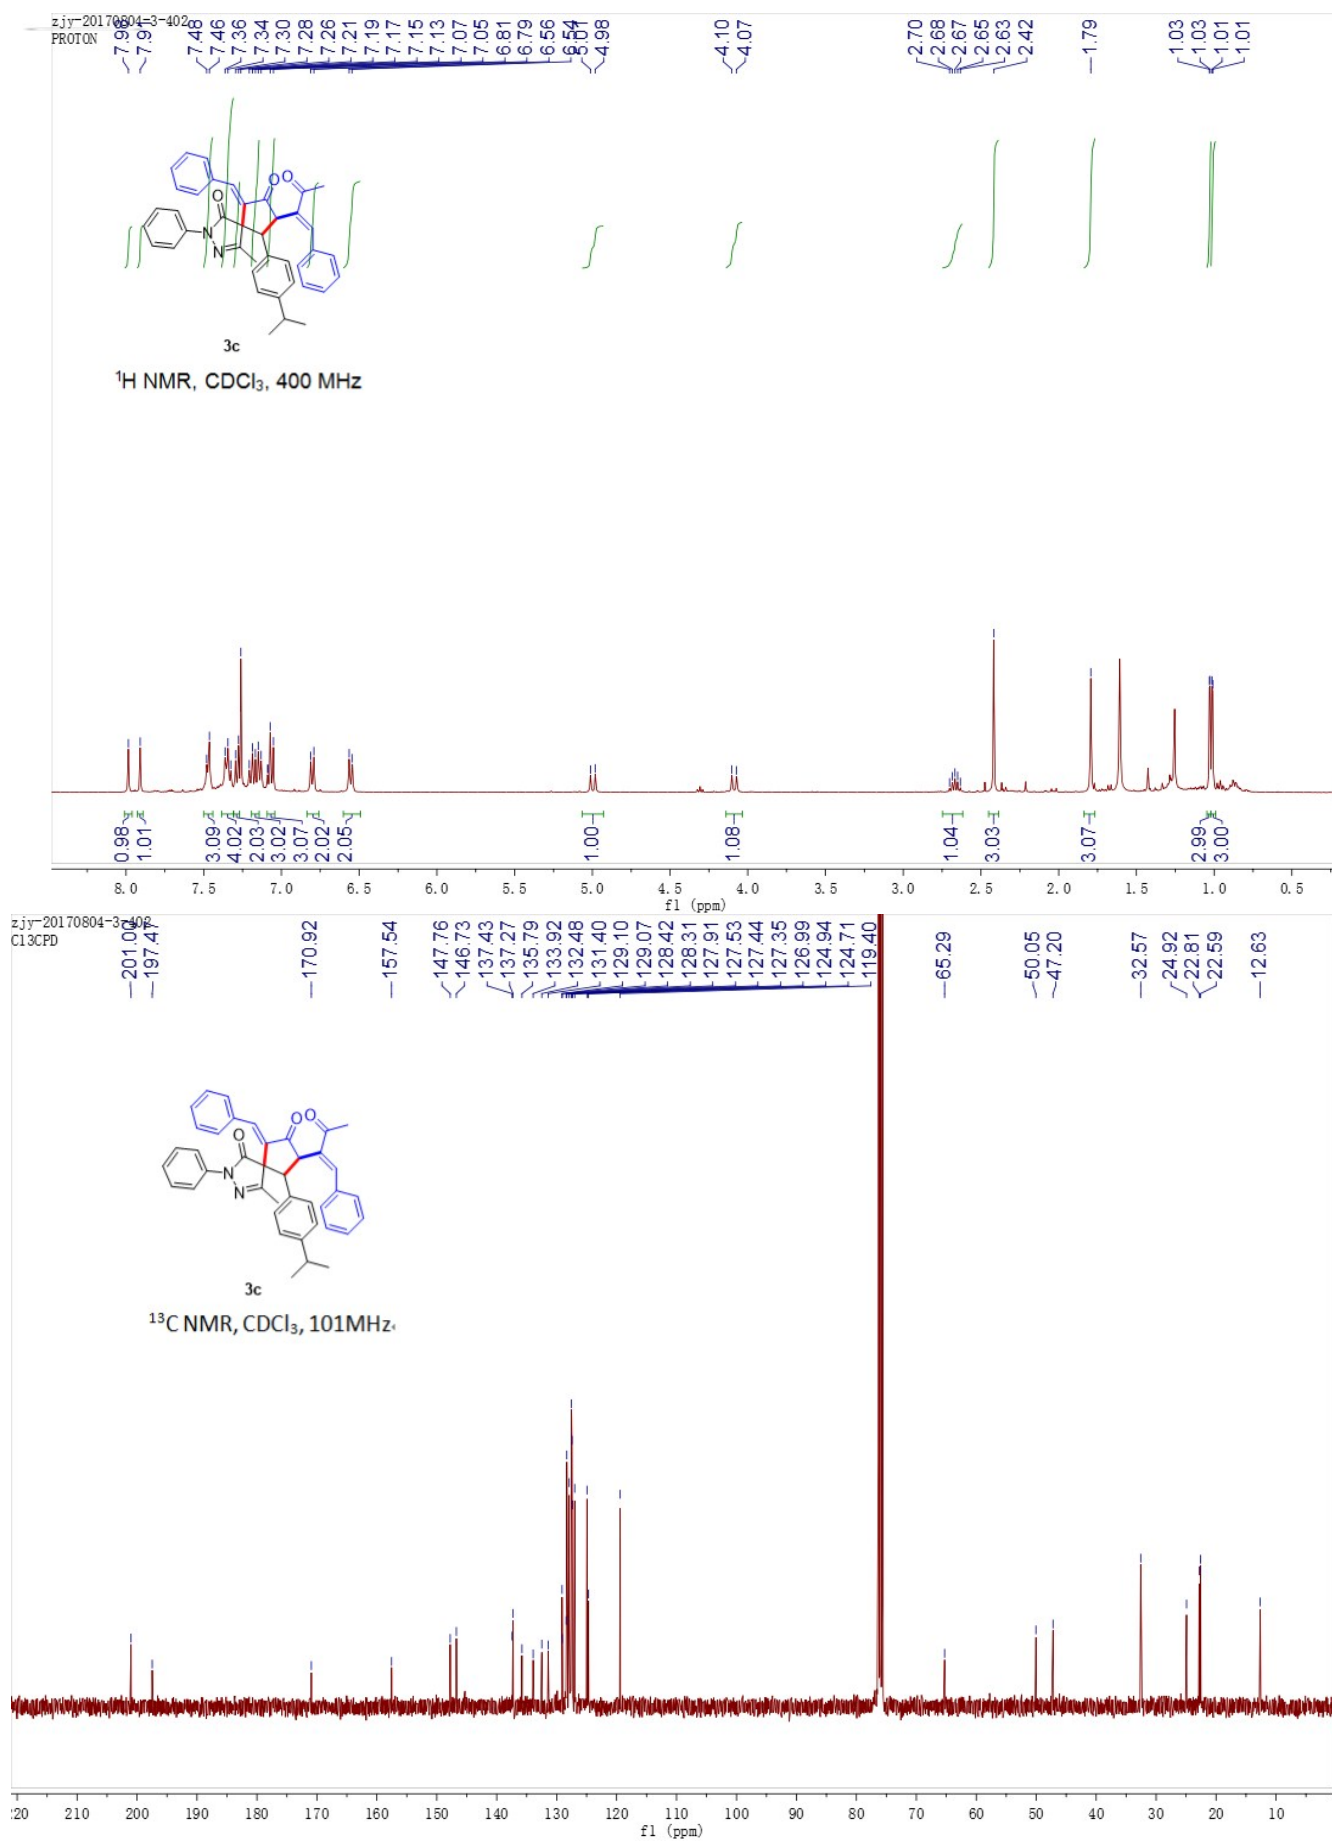

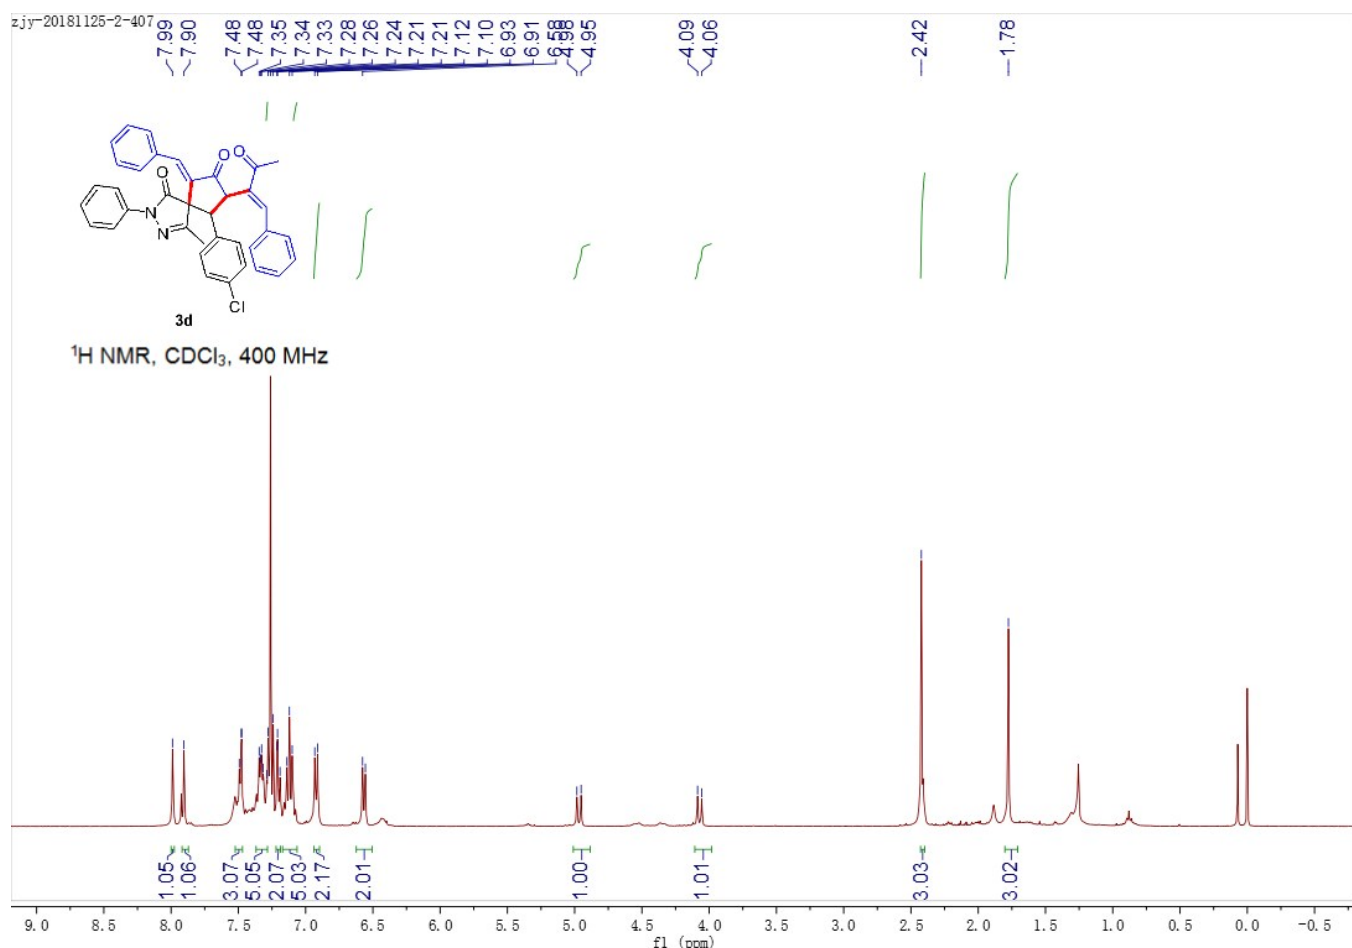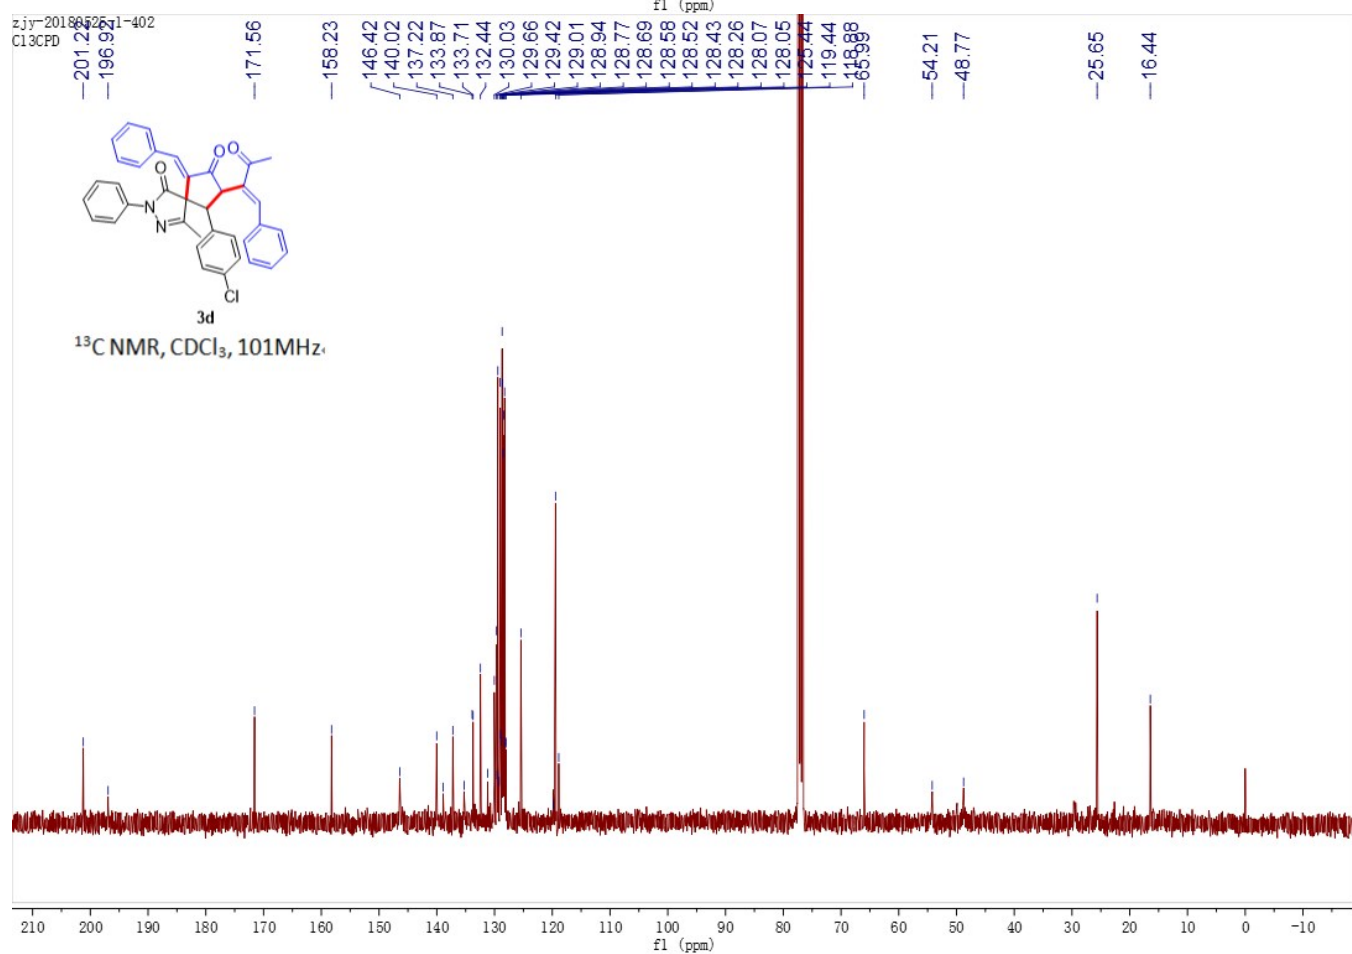

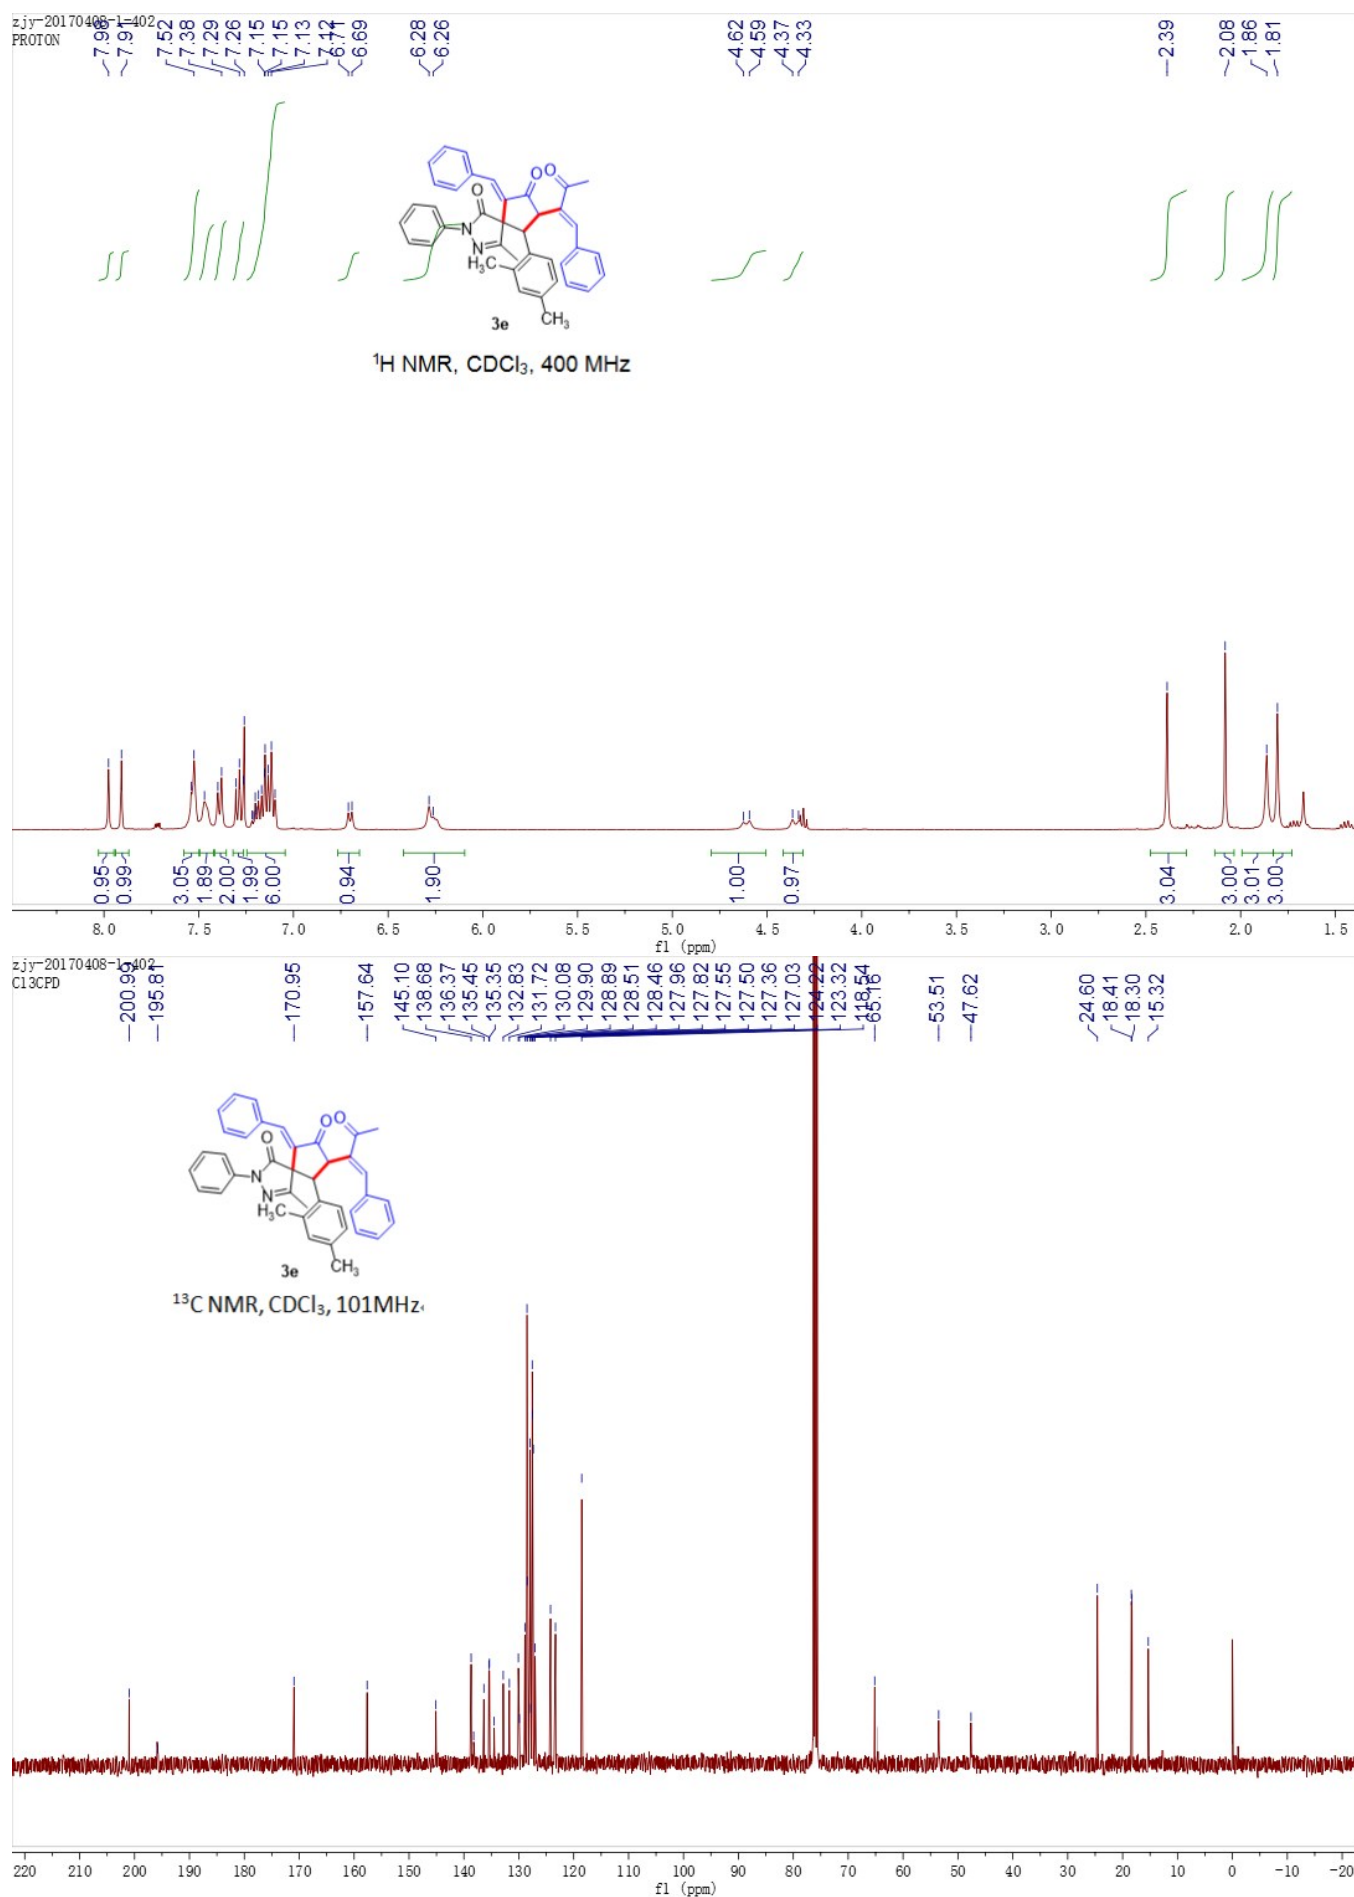

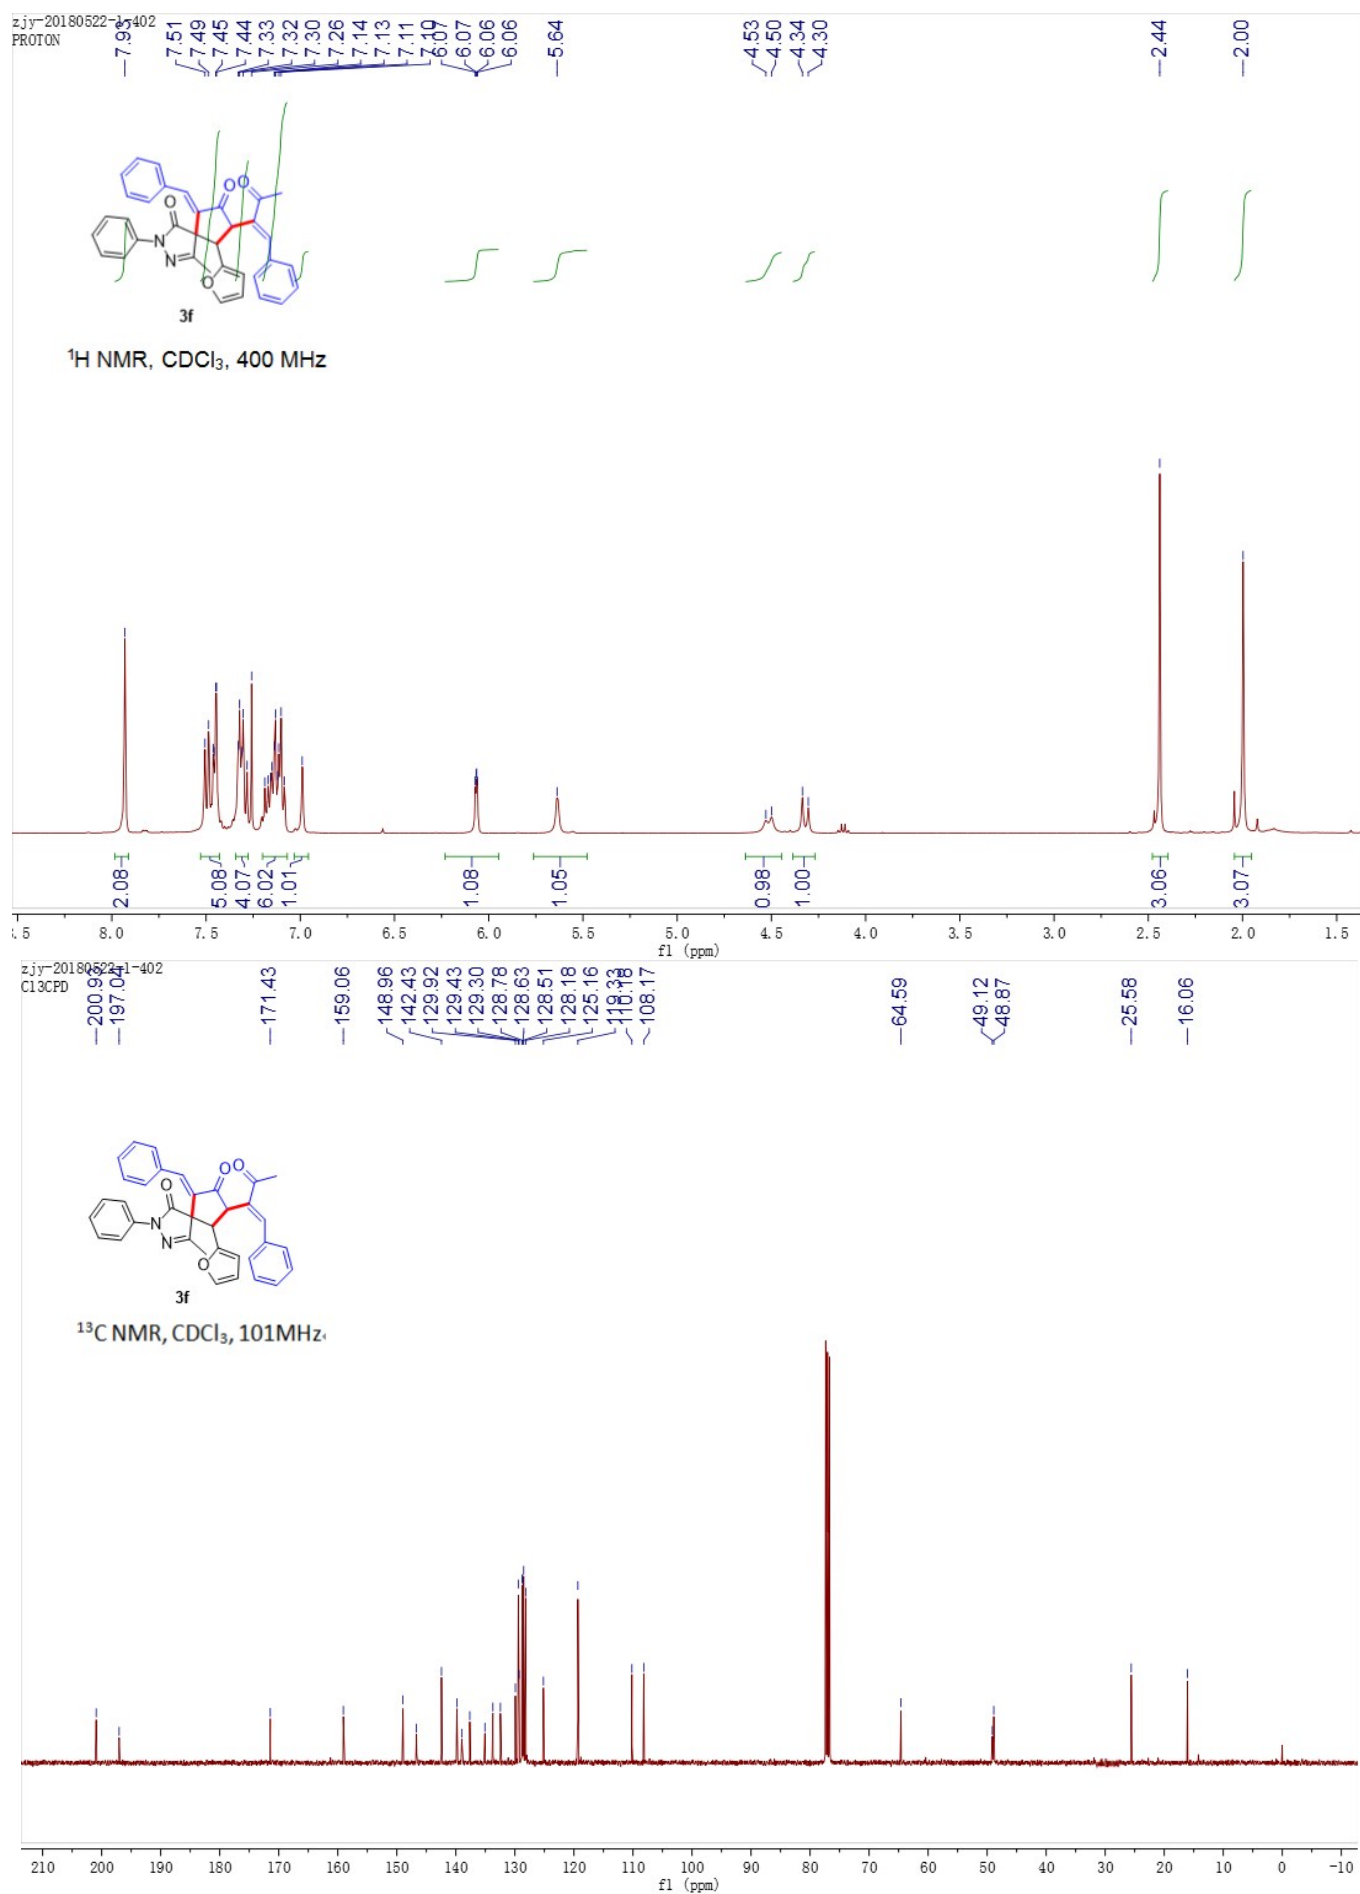



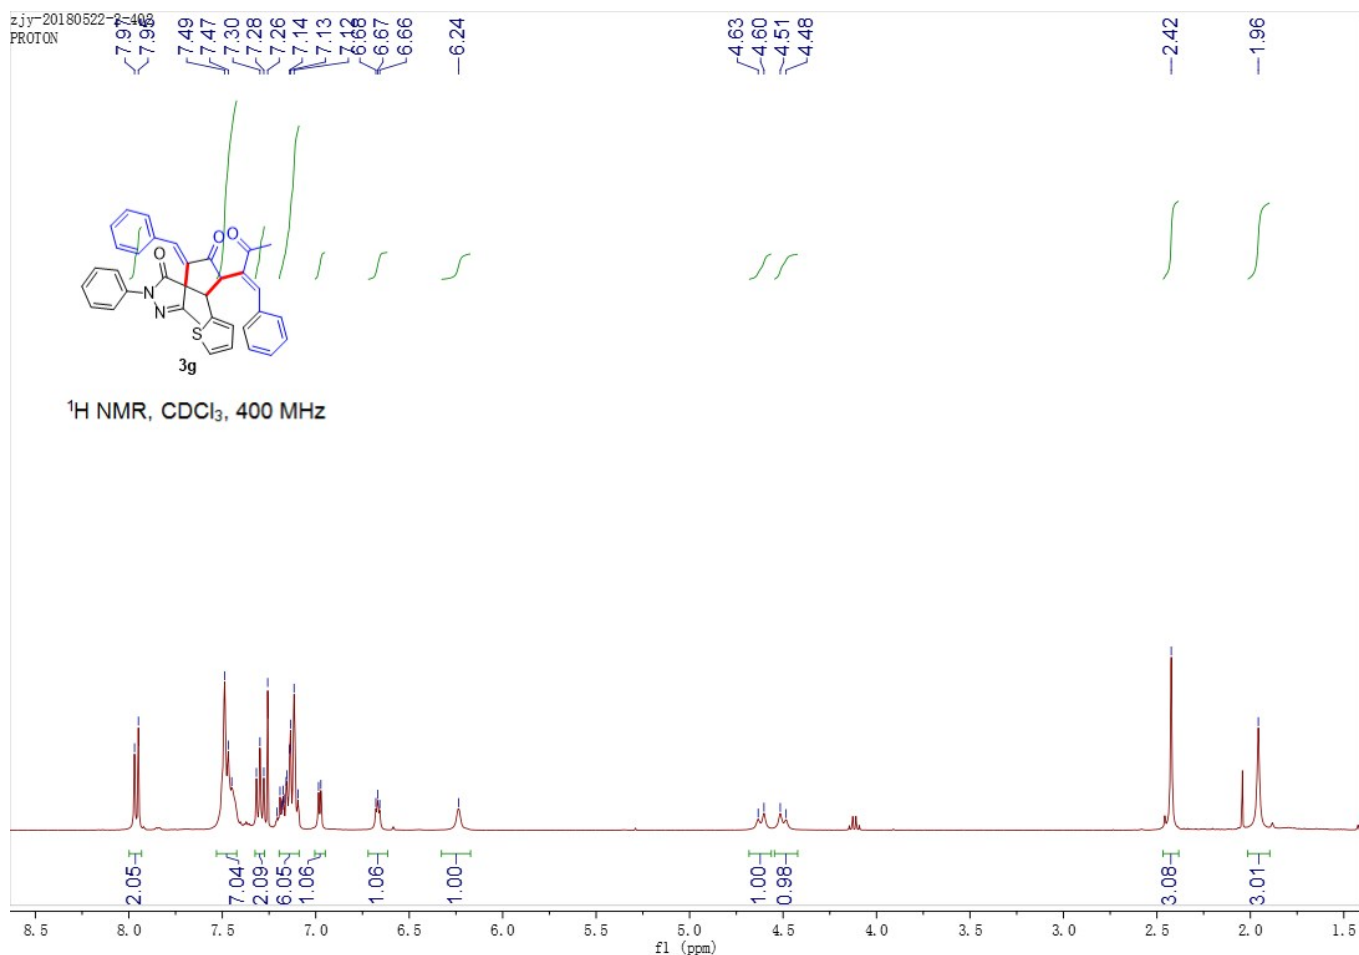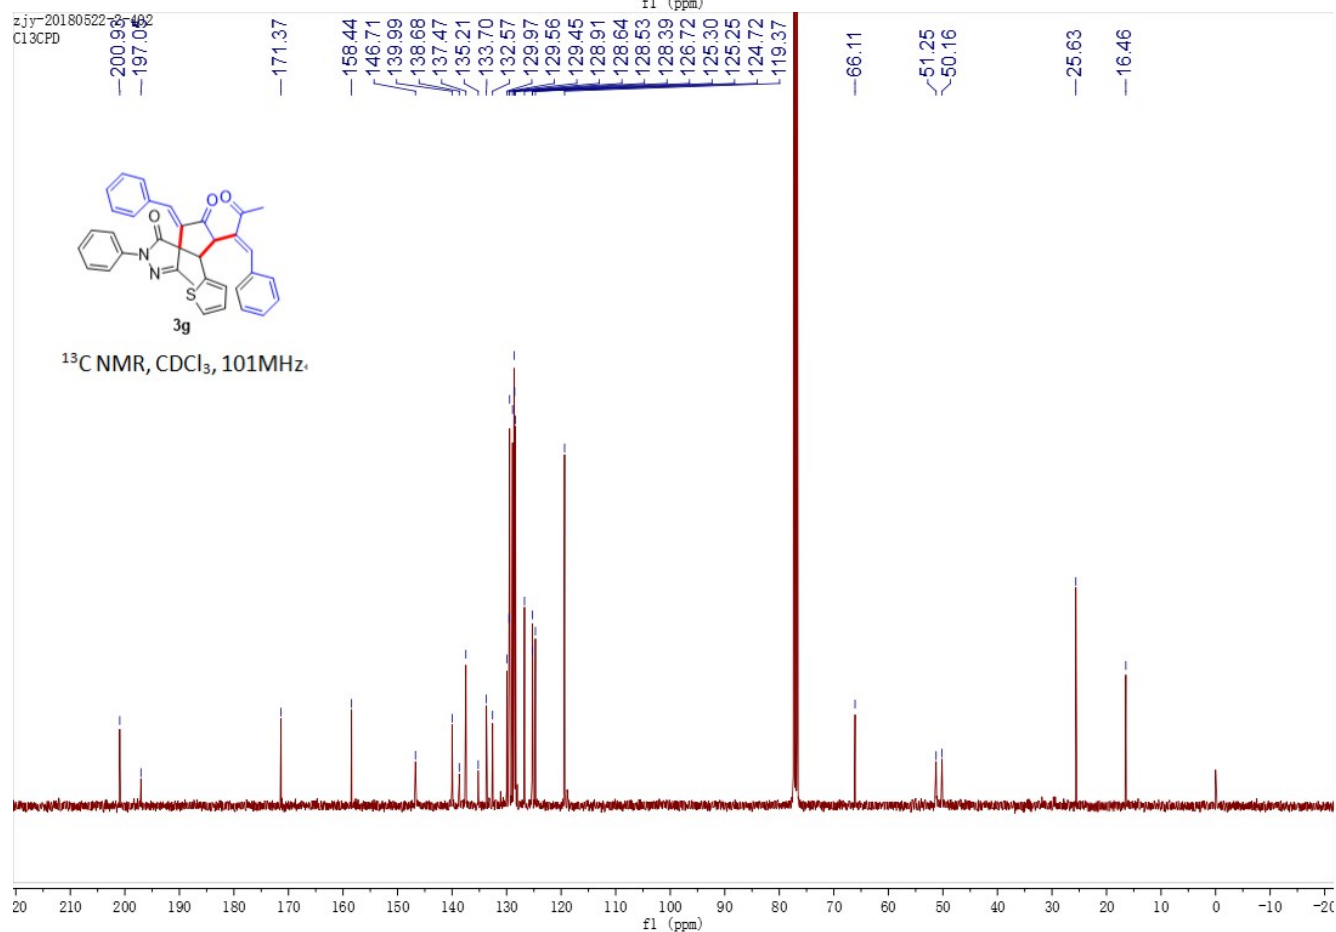



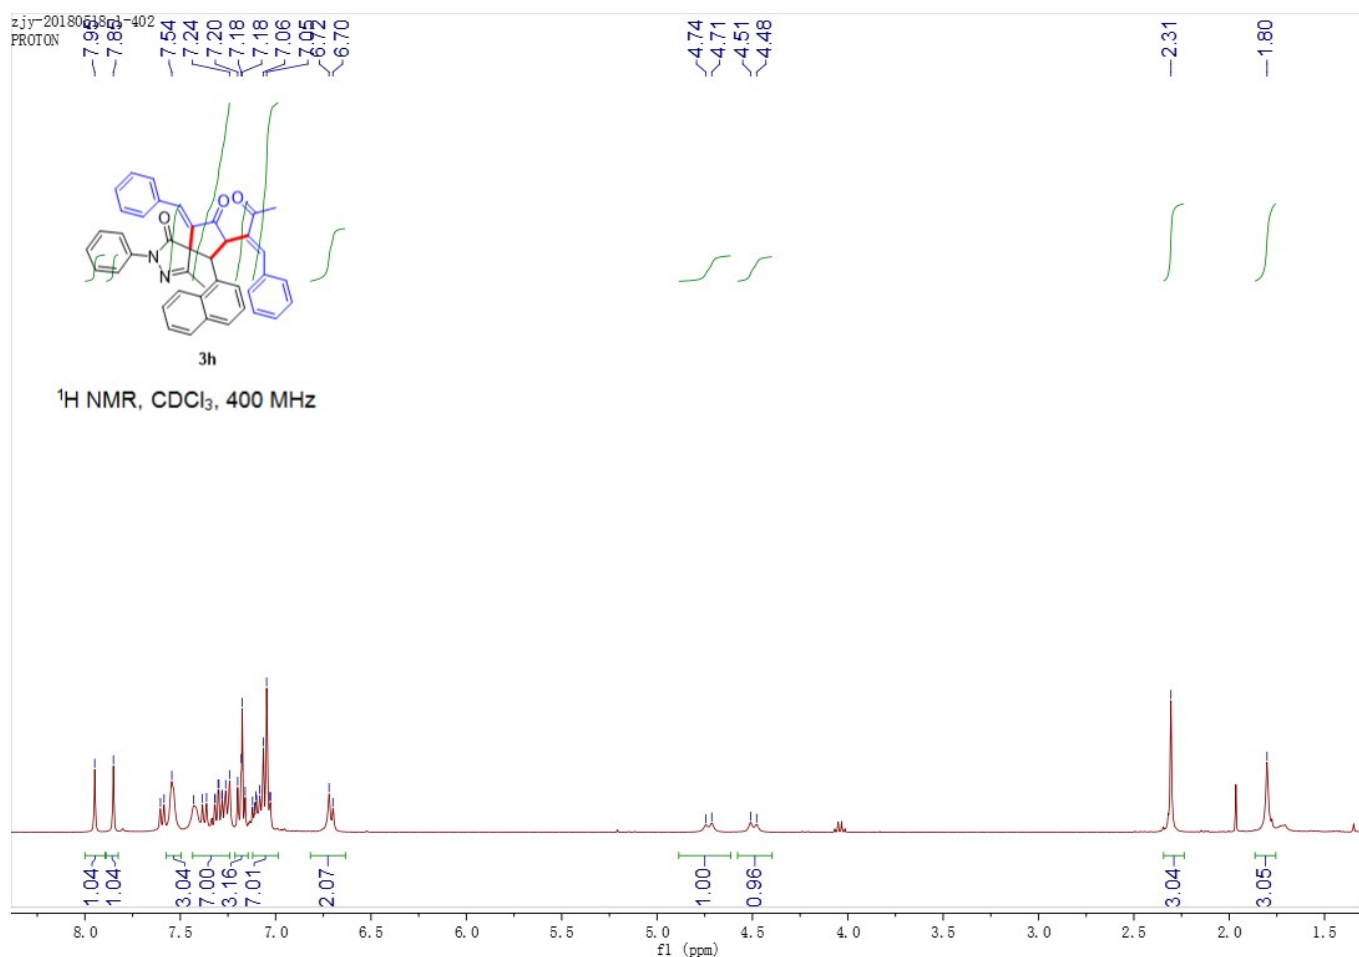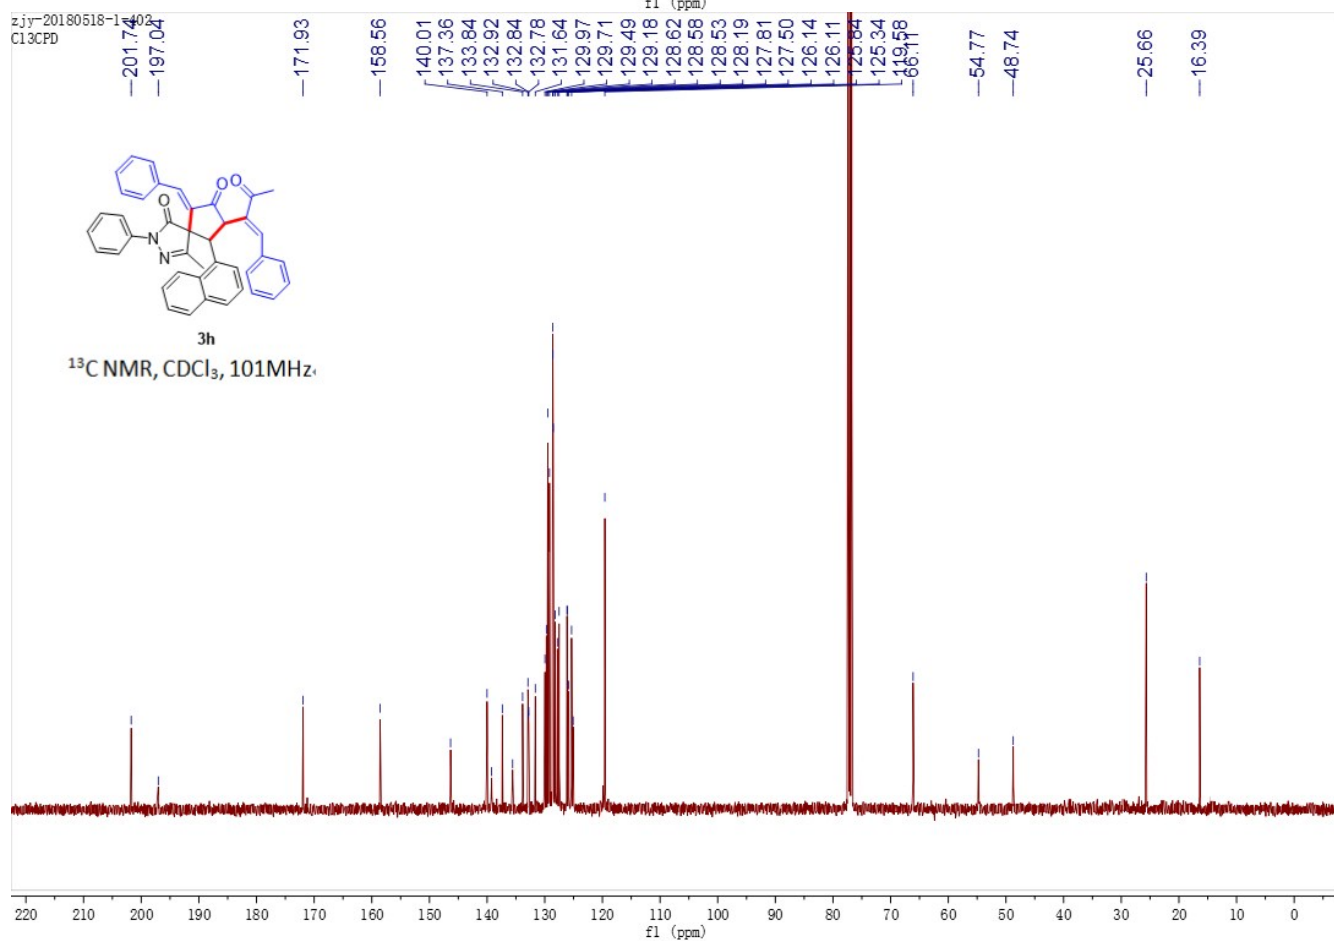

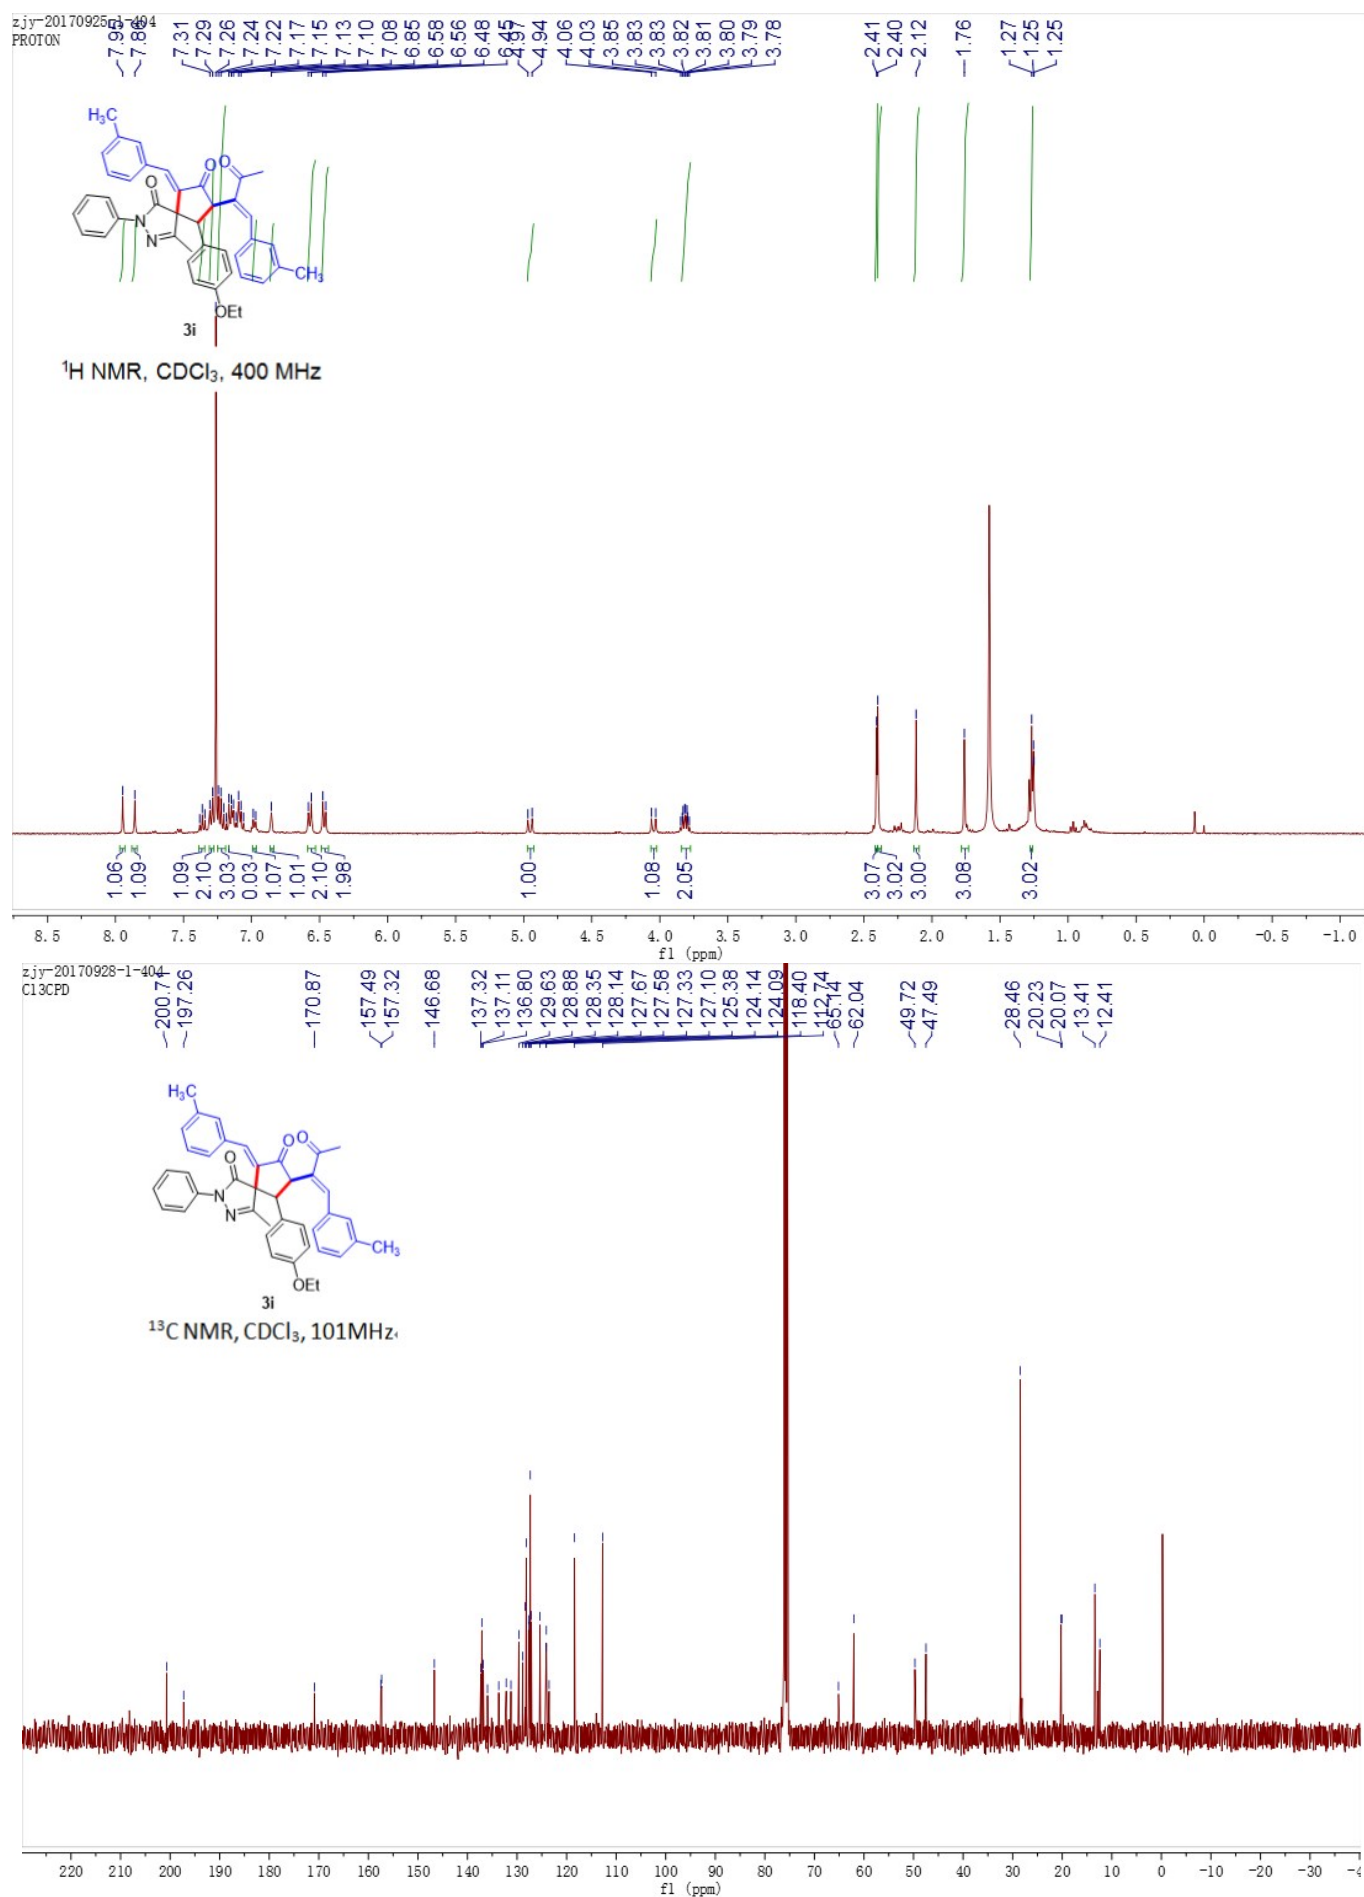

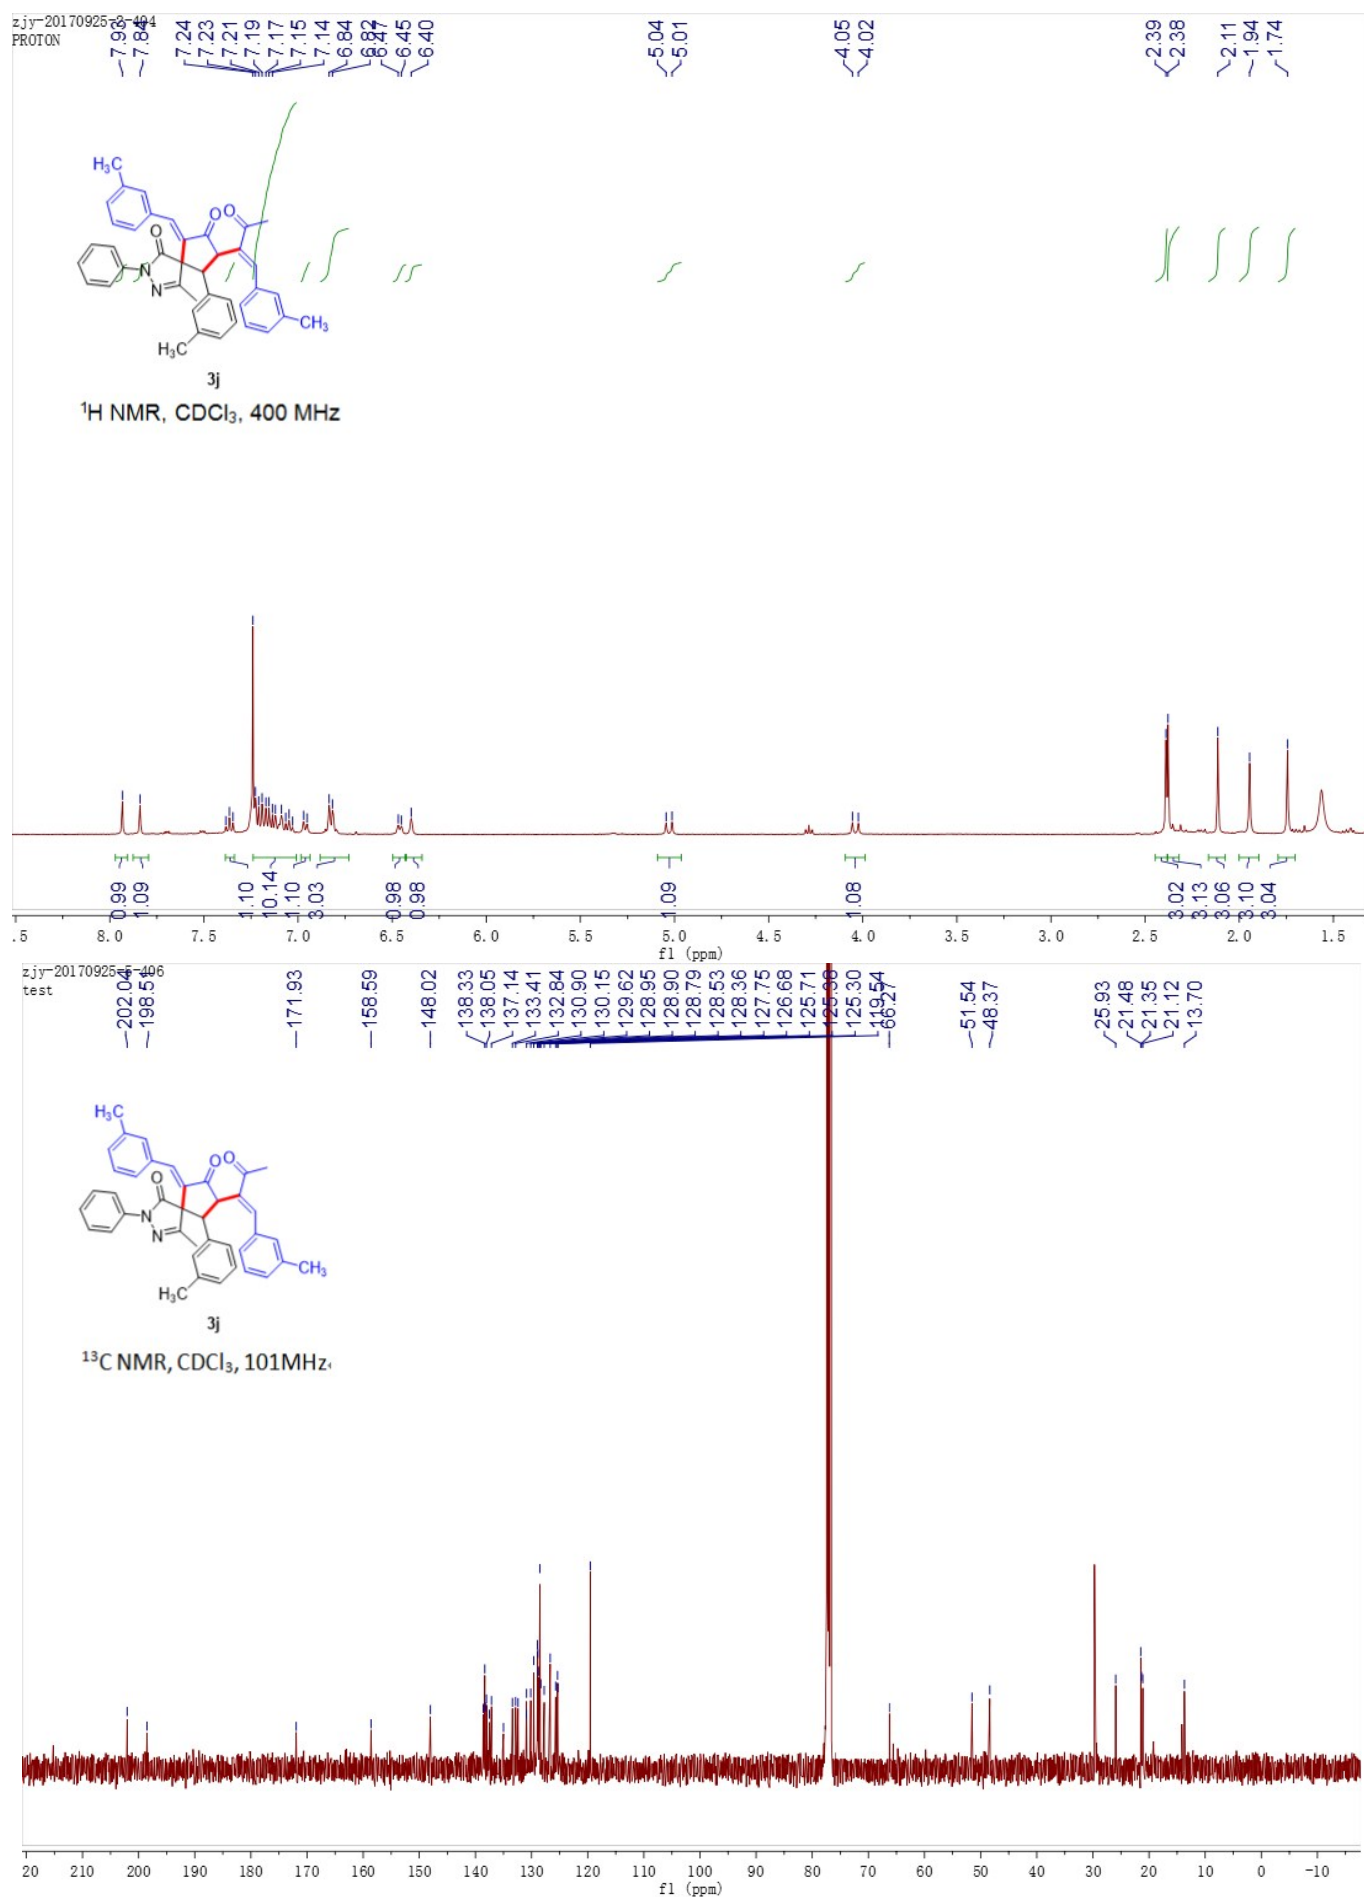

zjy-20160526-1-402  
PROTON

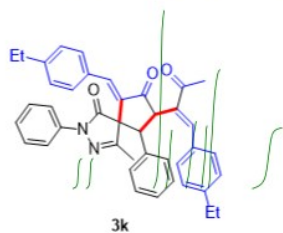

$^1\text{H}$  NMR,  $\text{CDCl}_3$ , 400 MHz

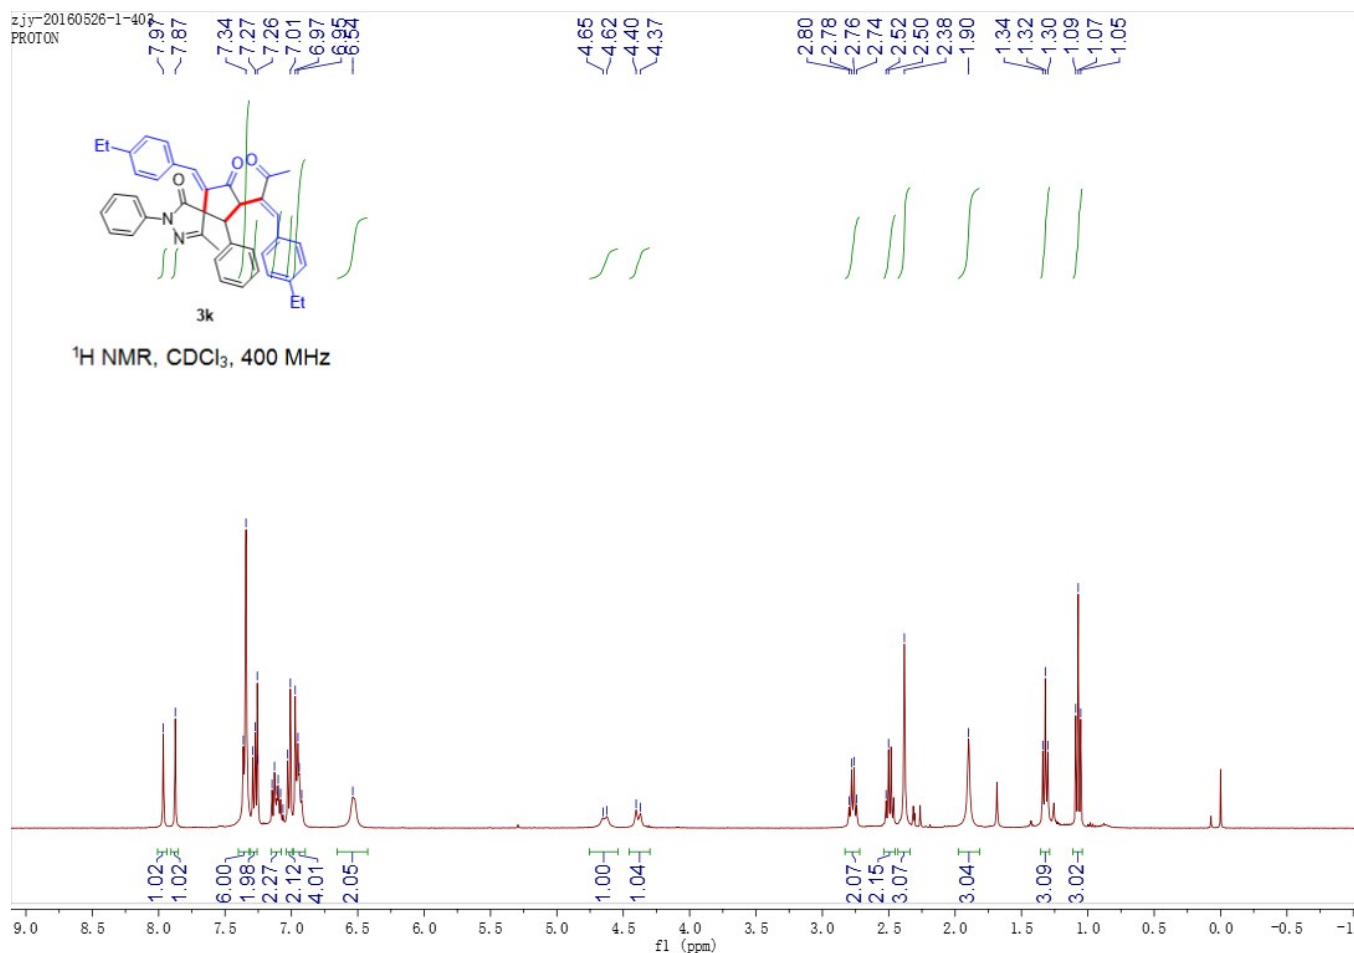

zjy-20181126-1-402  
Cl3CPD

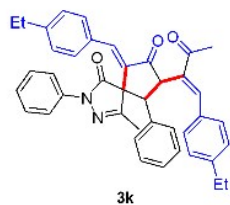

$^{13}\text{C}$  NMR,  $\text{CDCl}_3$ , 101MHz

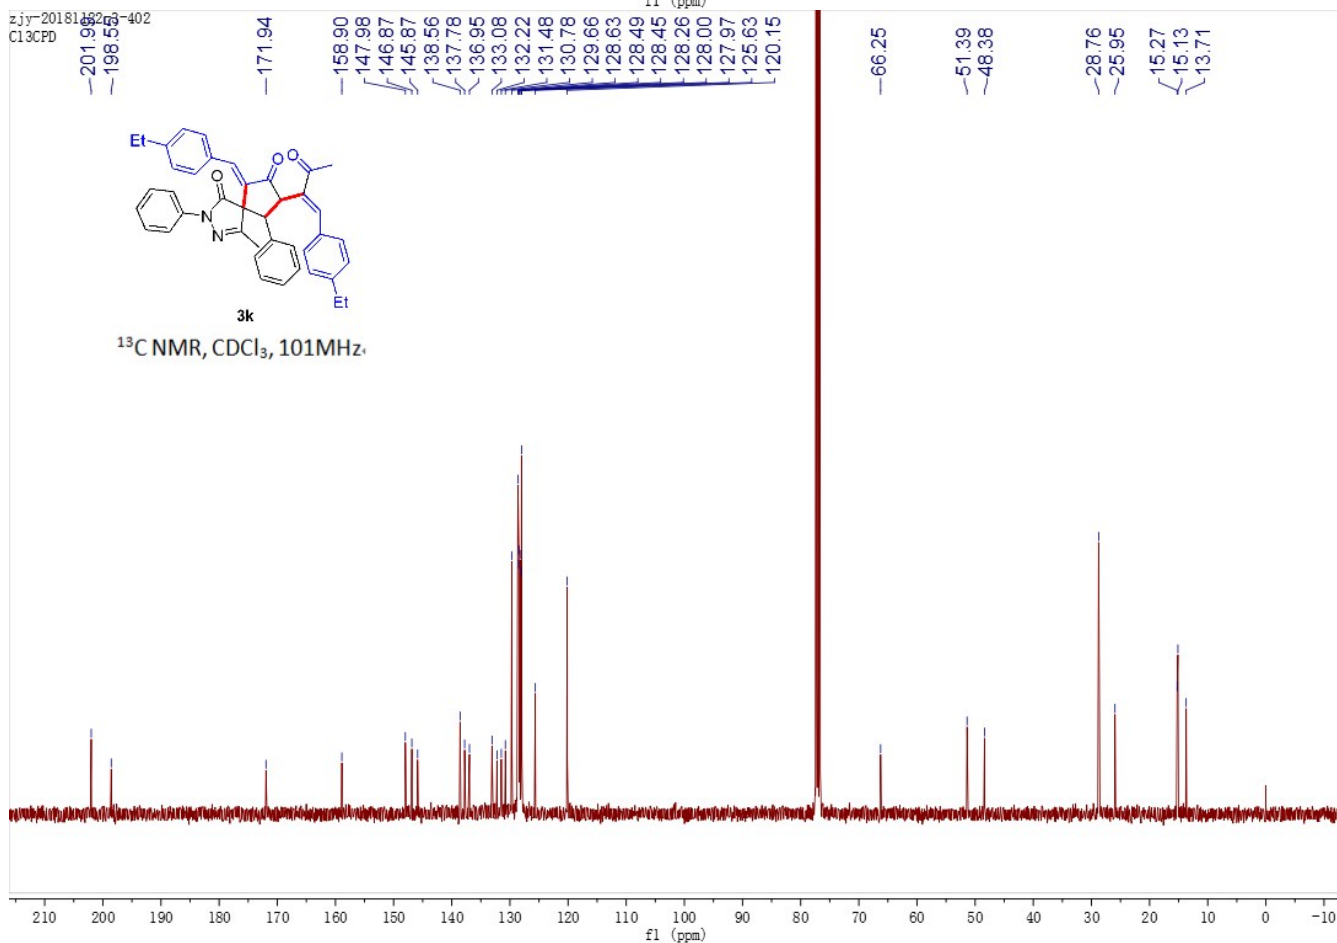

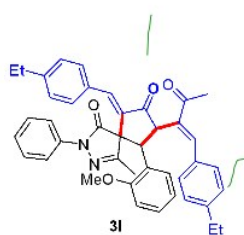
 $^1\text{H}$  NMR,  $\text{CDCl}_3$ , 400 MHz
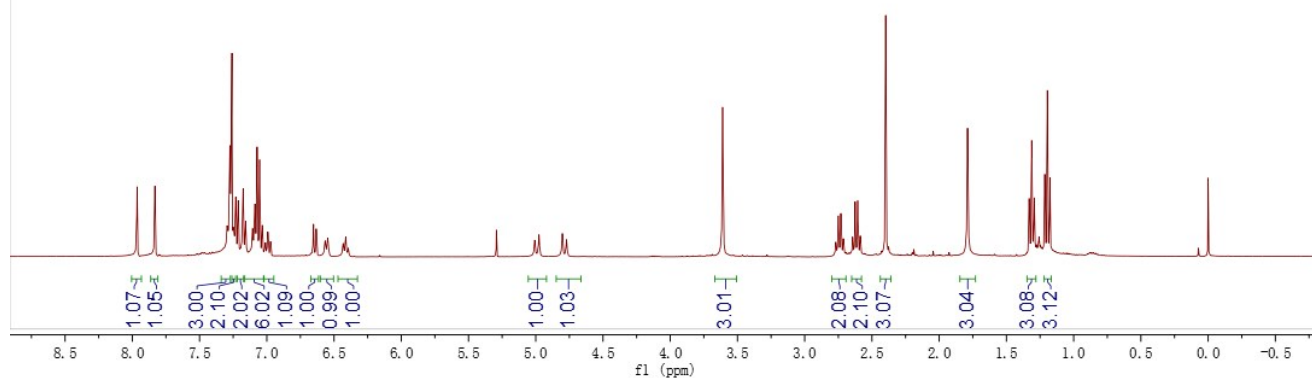zjy-20181122-1-407  
13CPD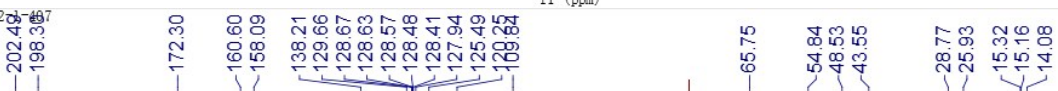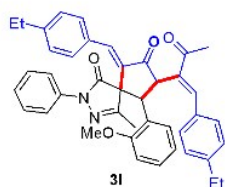
 $^{13}\text{C}$  NMR,  $\text{CDCl}_3$ , 101MHz
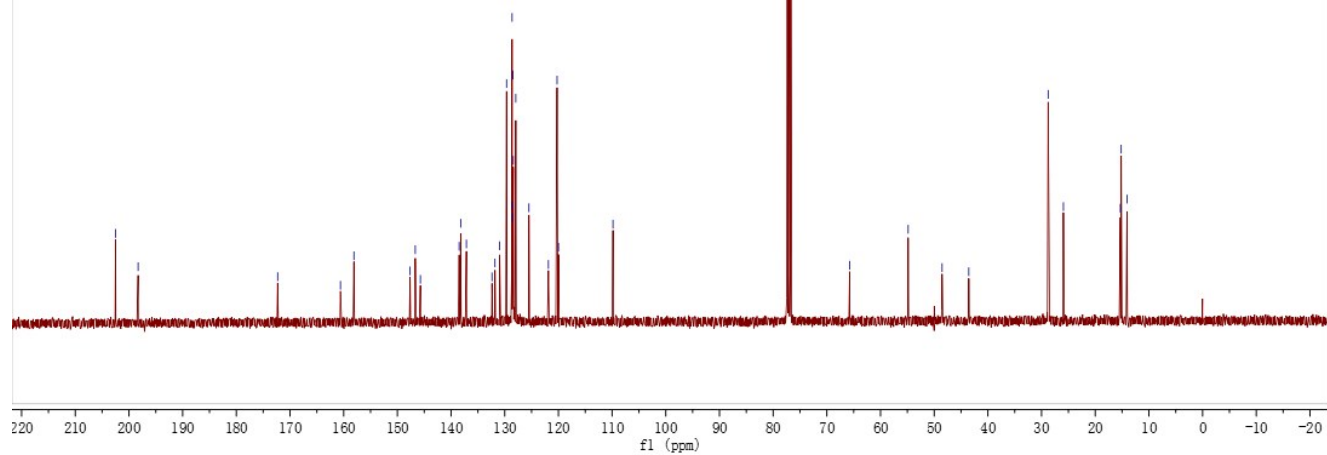

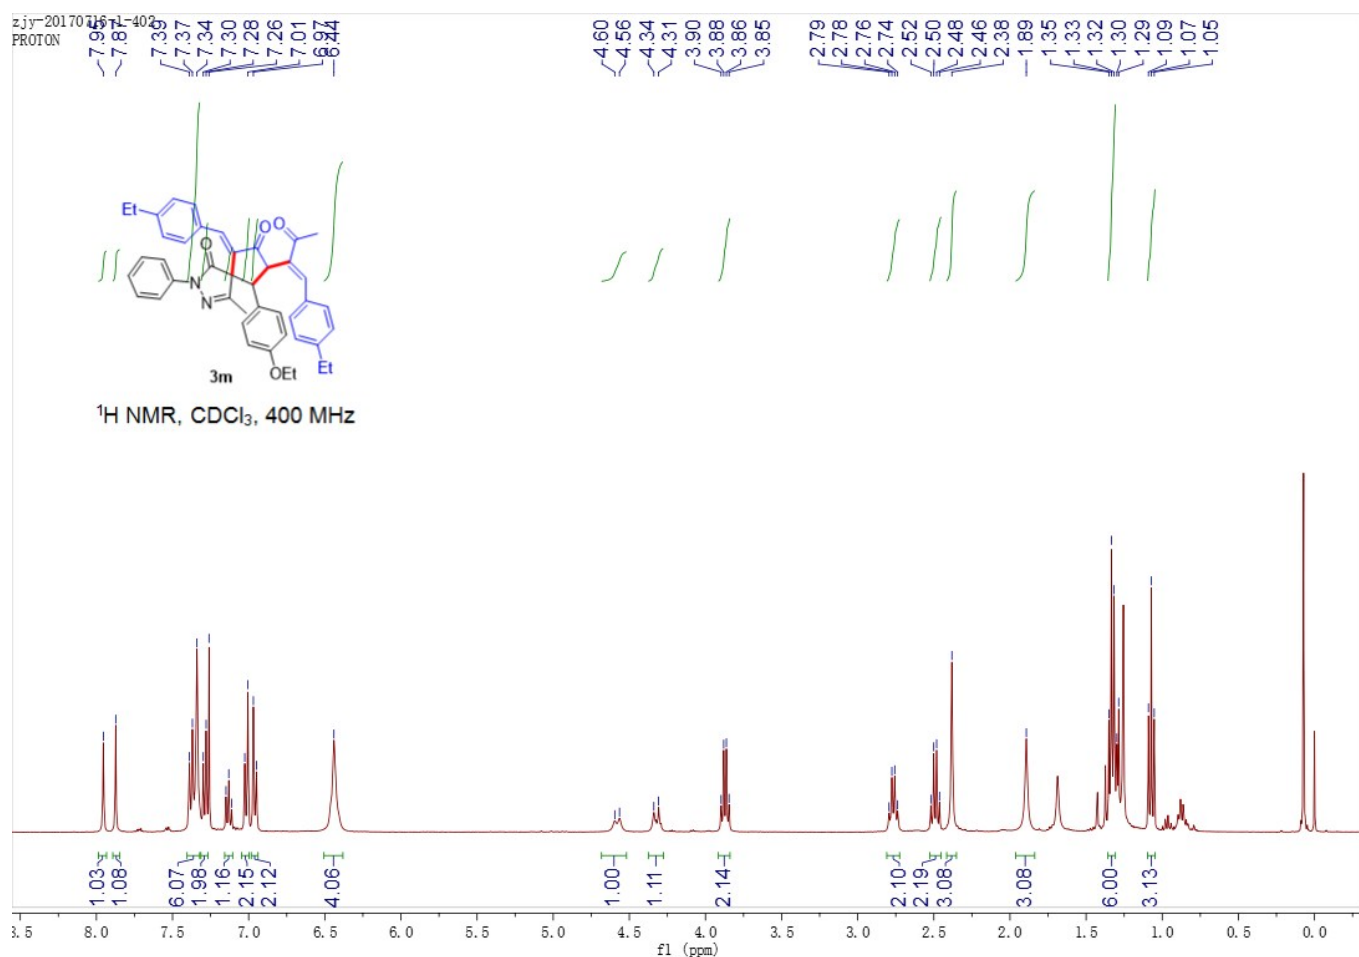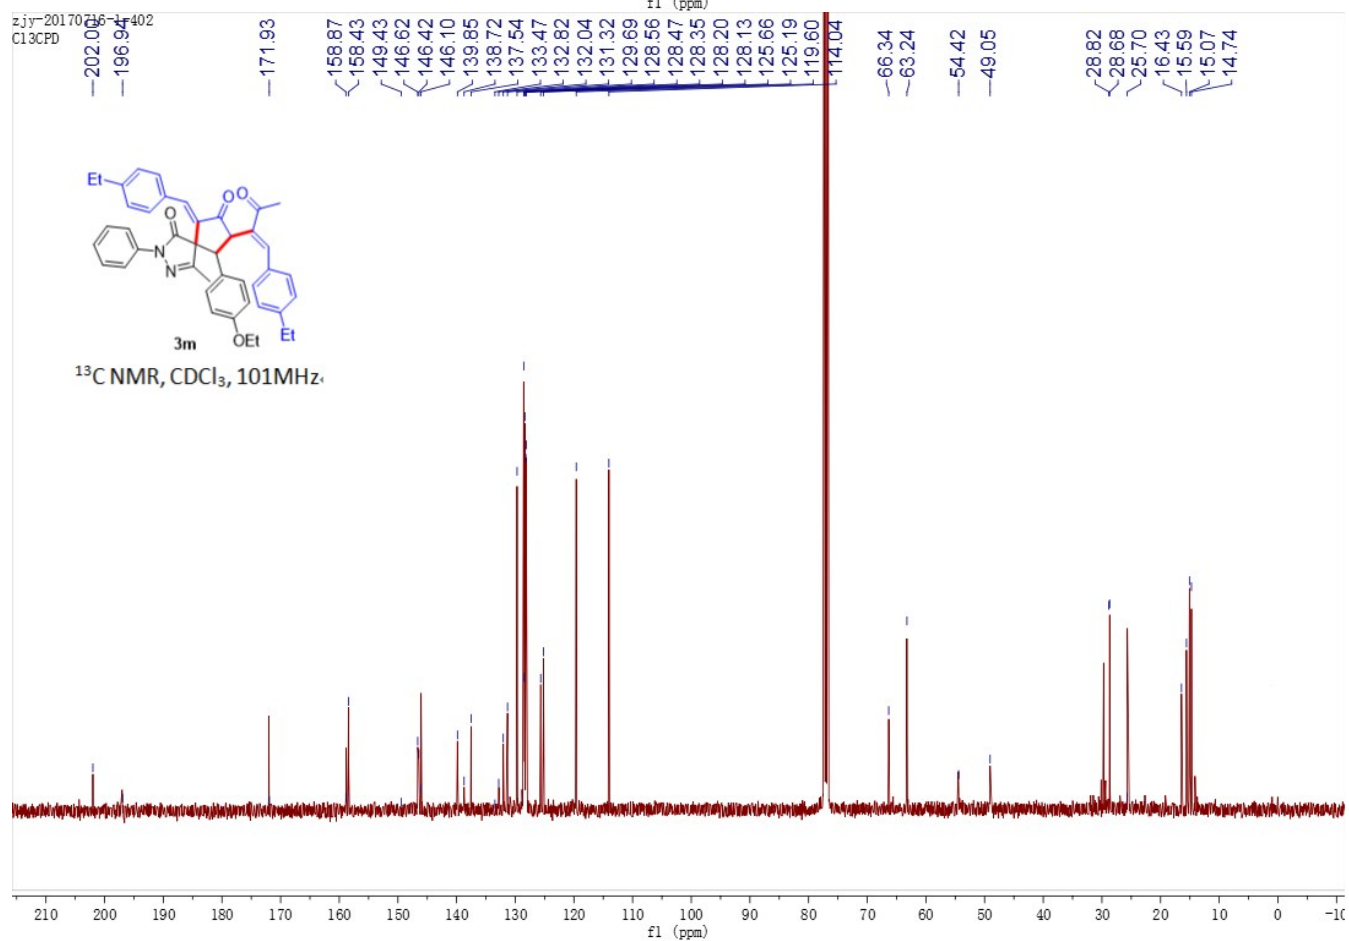



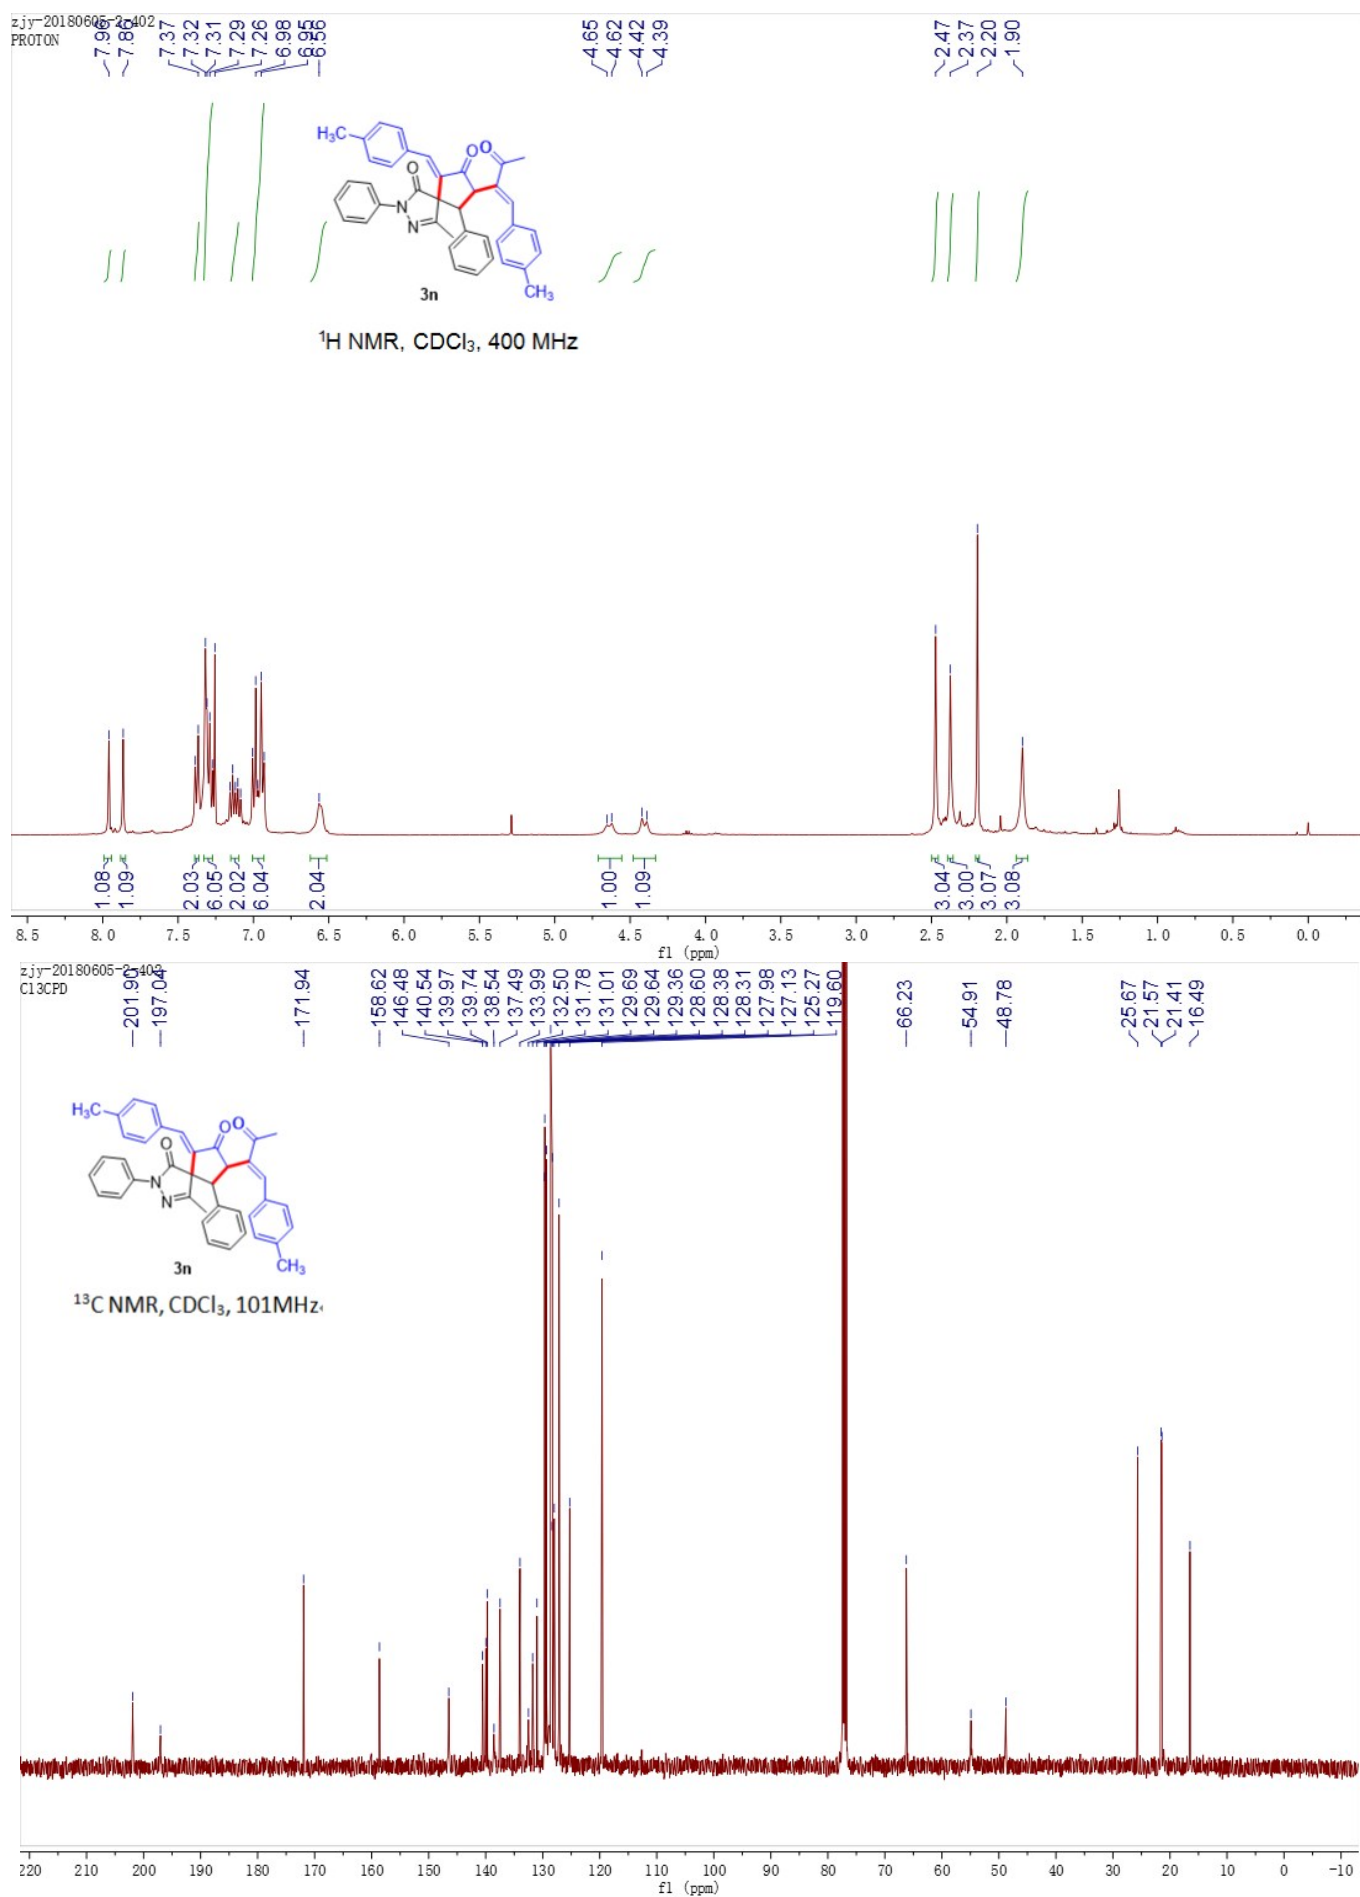

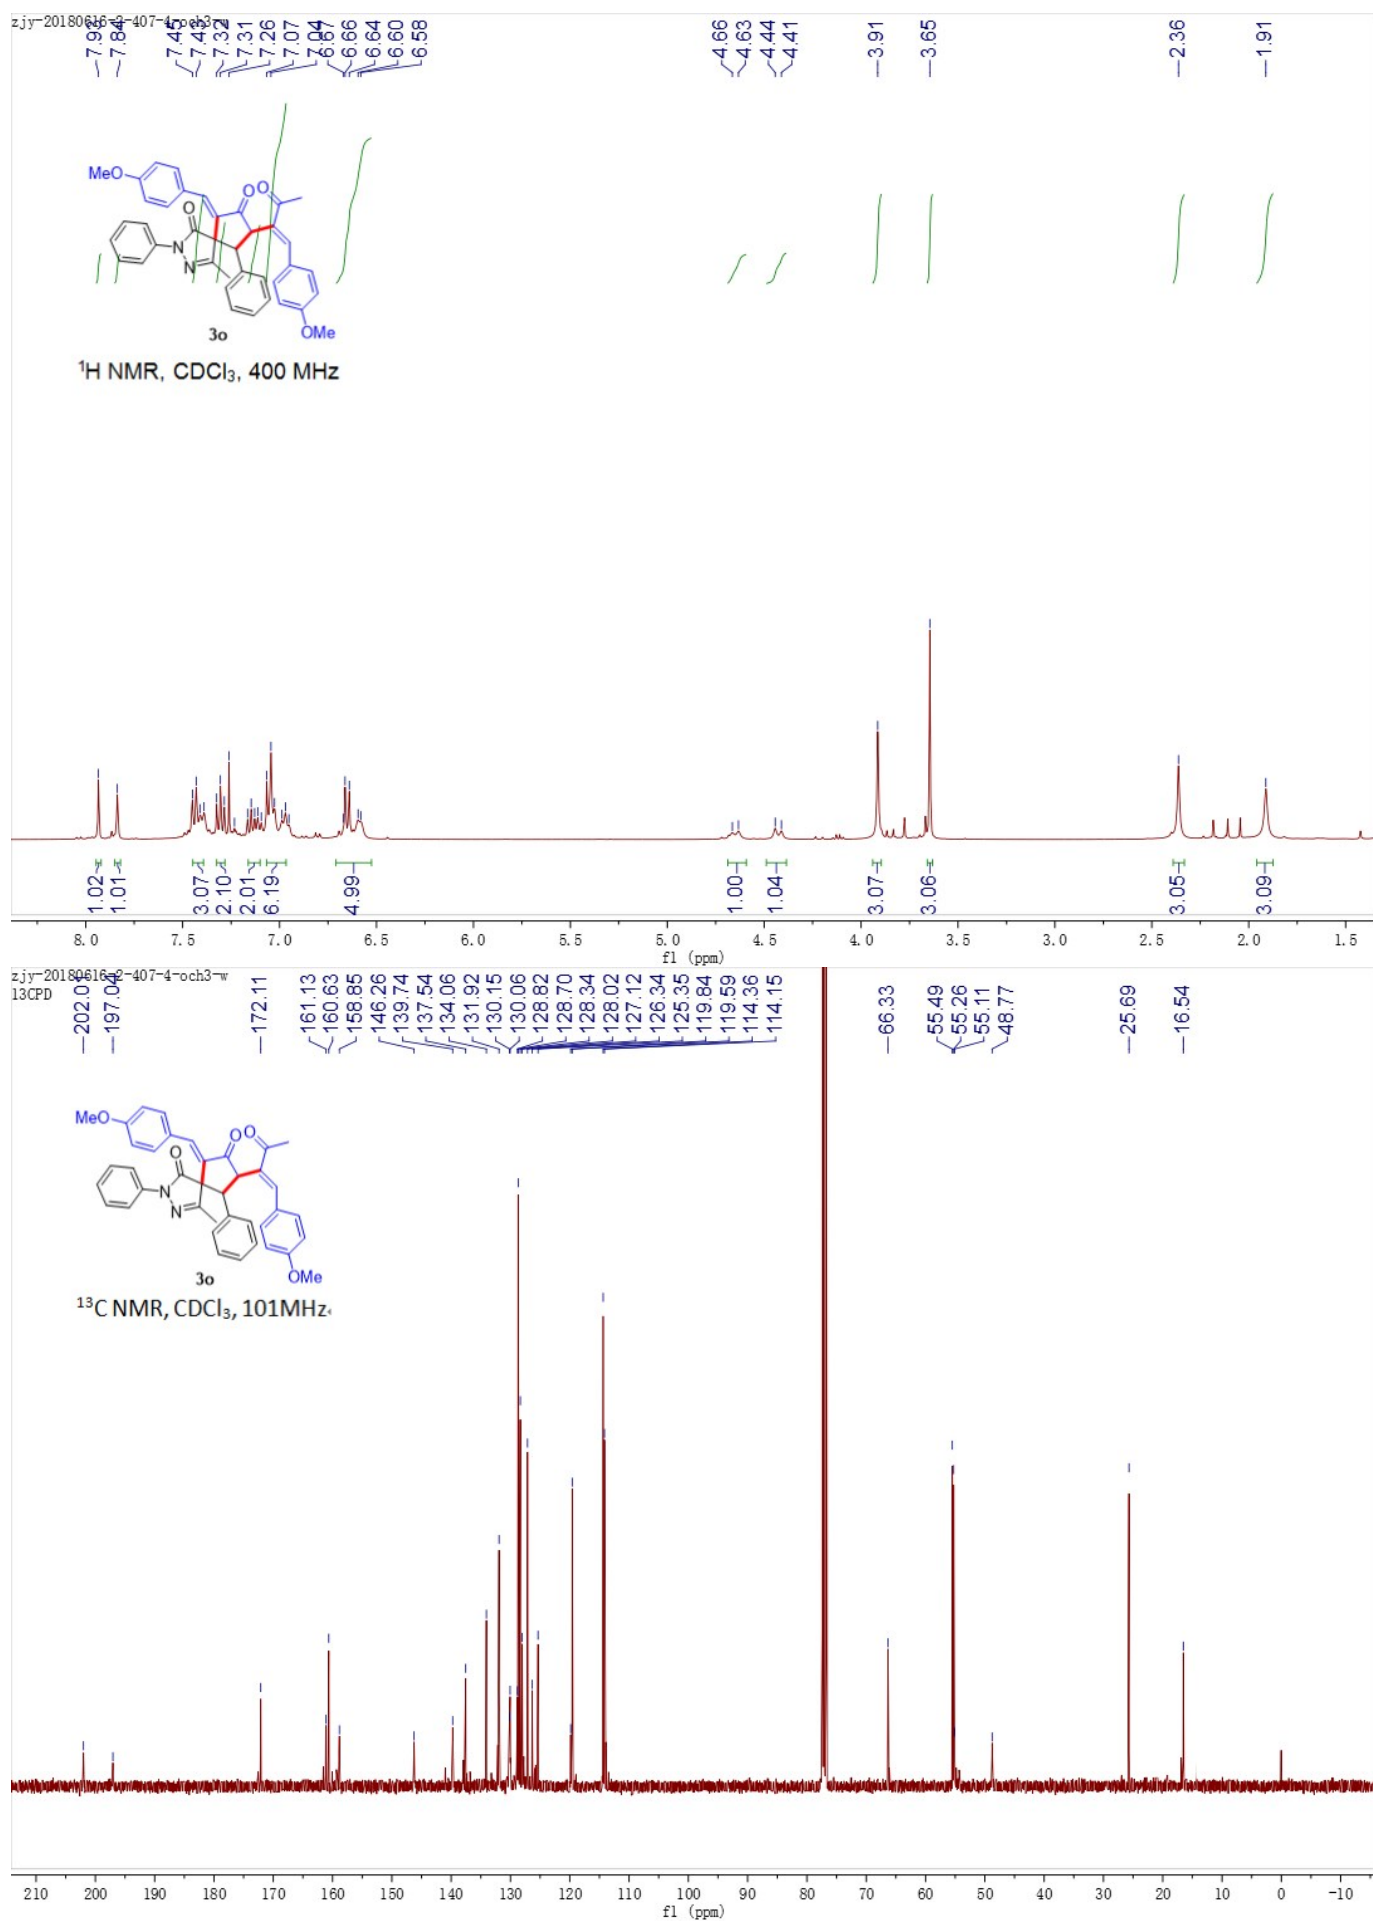



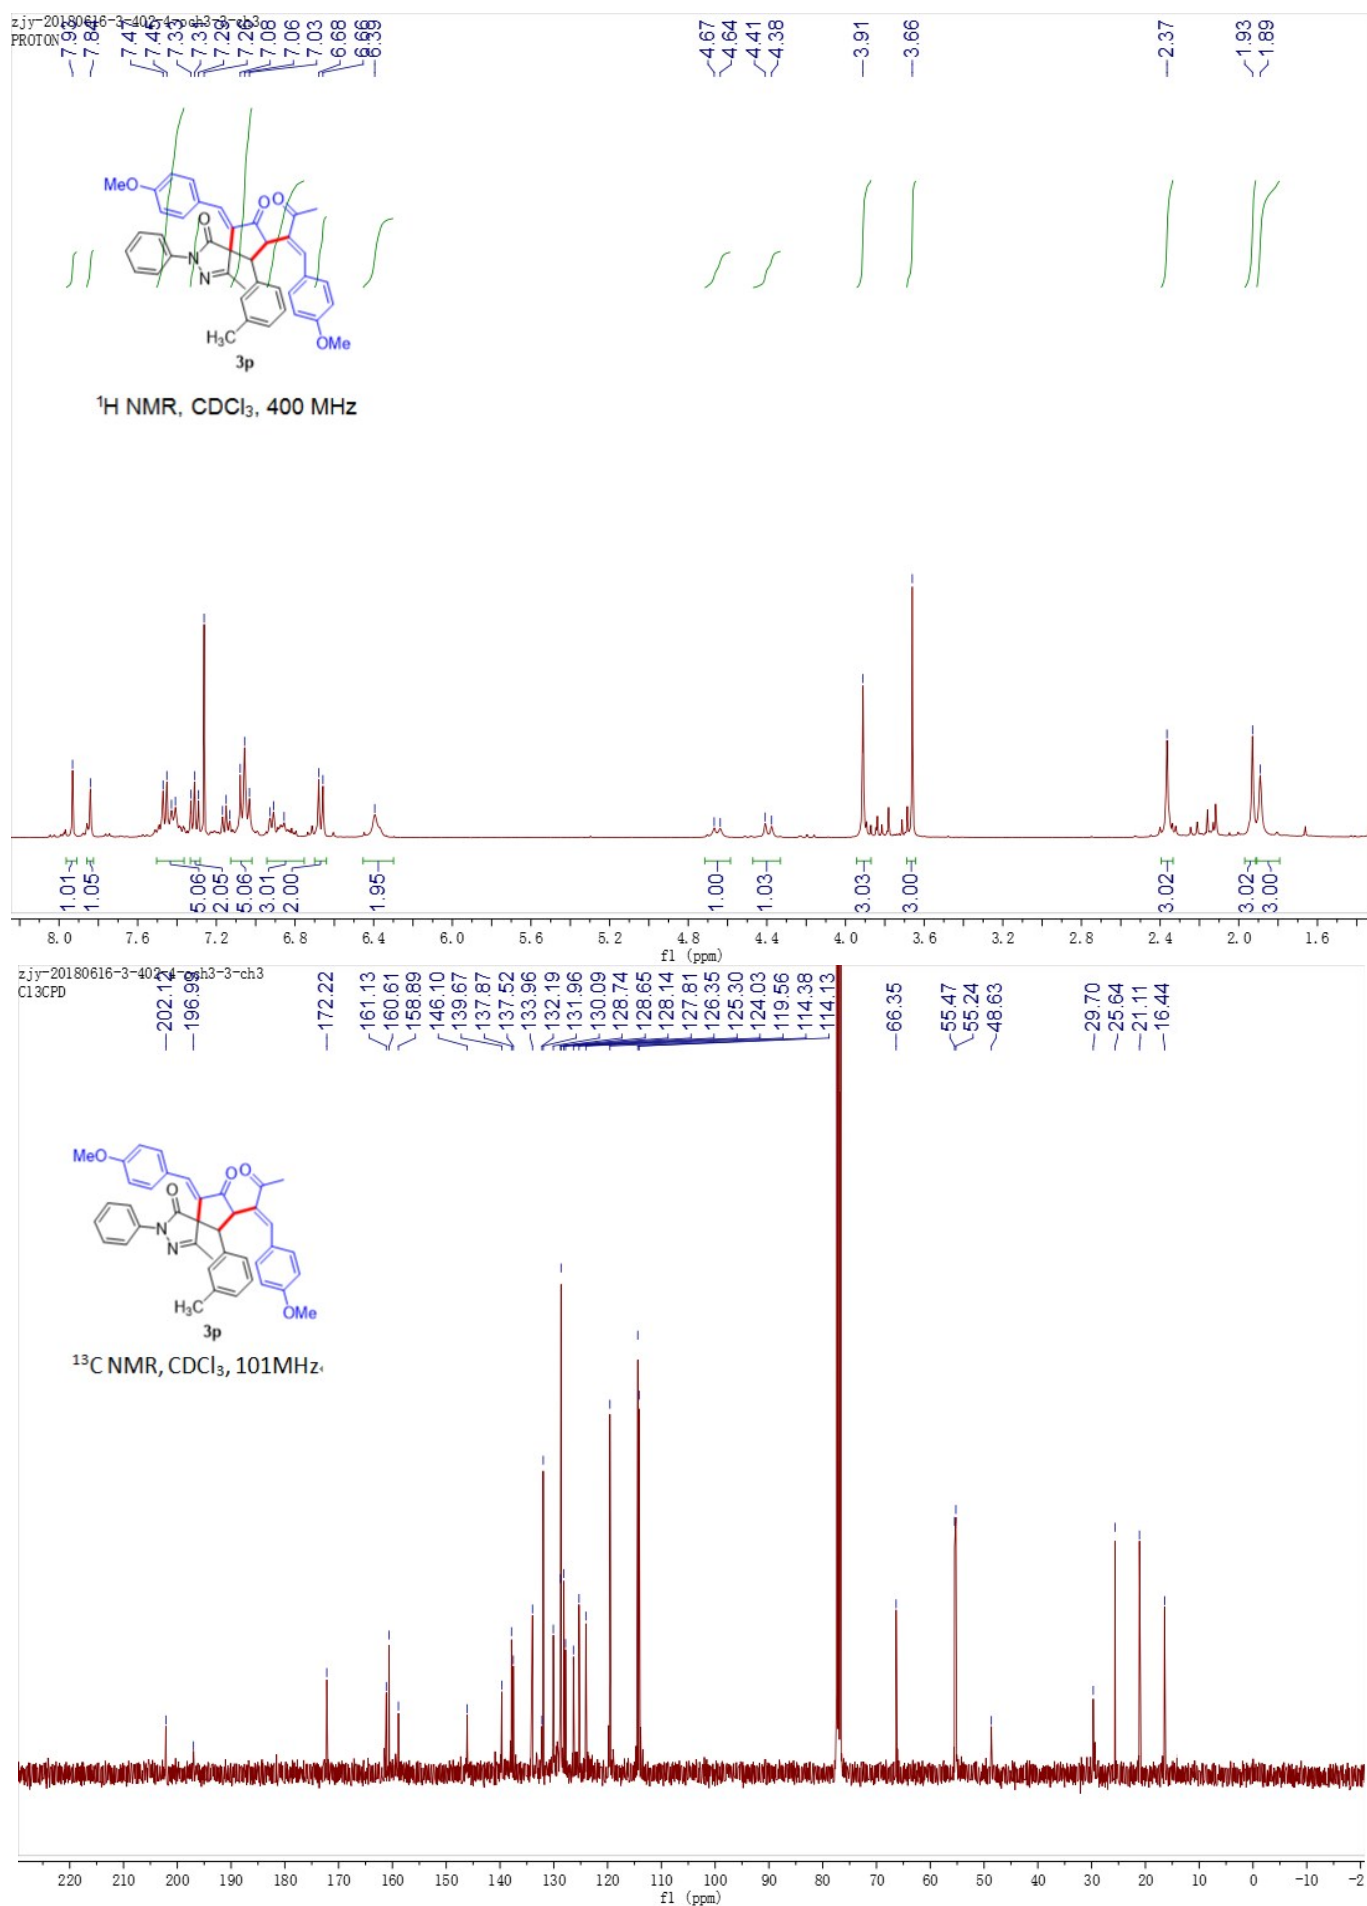

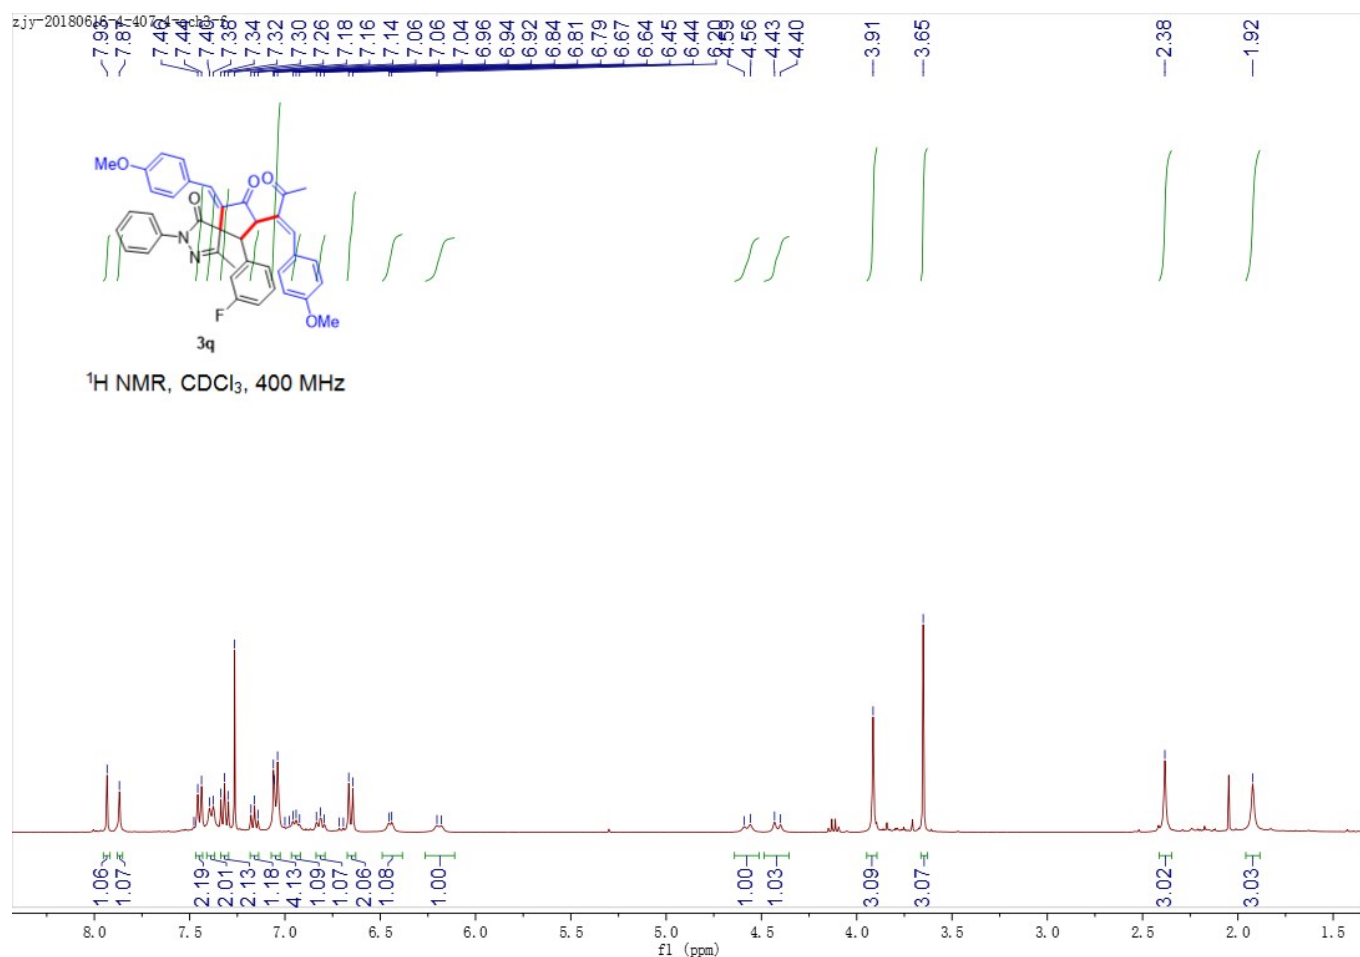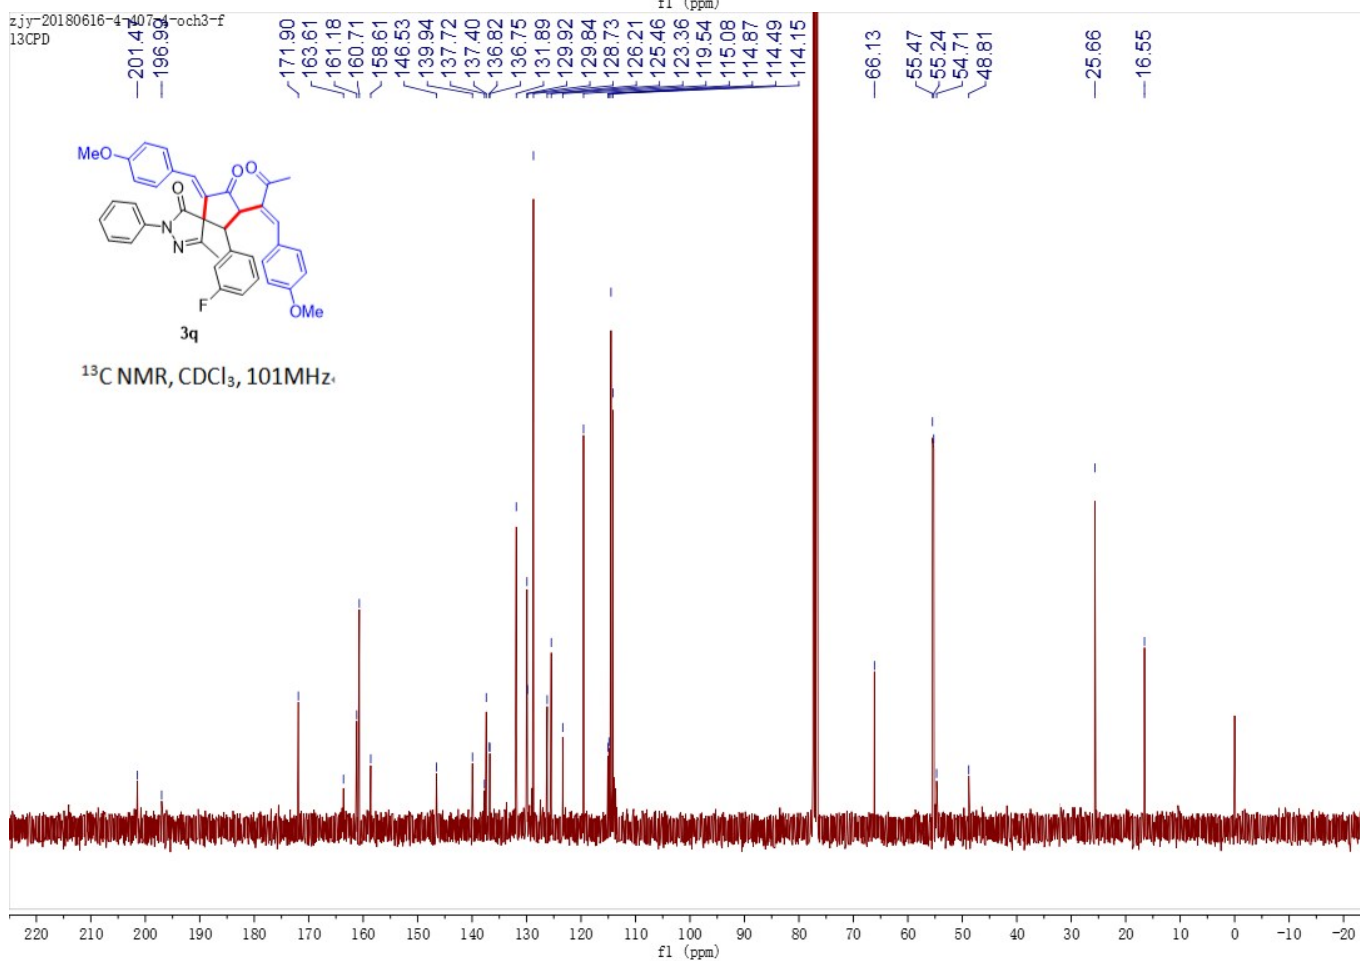

zjy-20181126-1-407

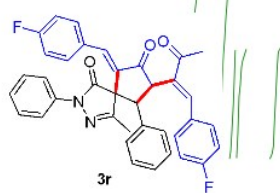

$^1\text{H}$  NMR,  $\text{CDCl}_3$ , 400 MHz

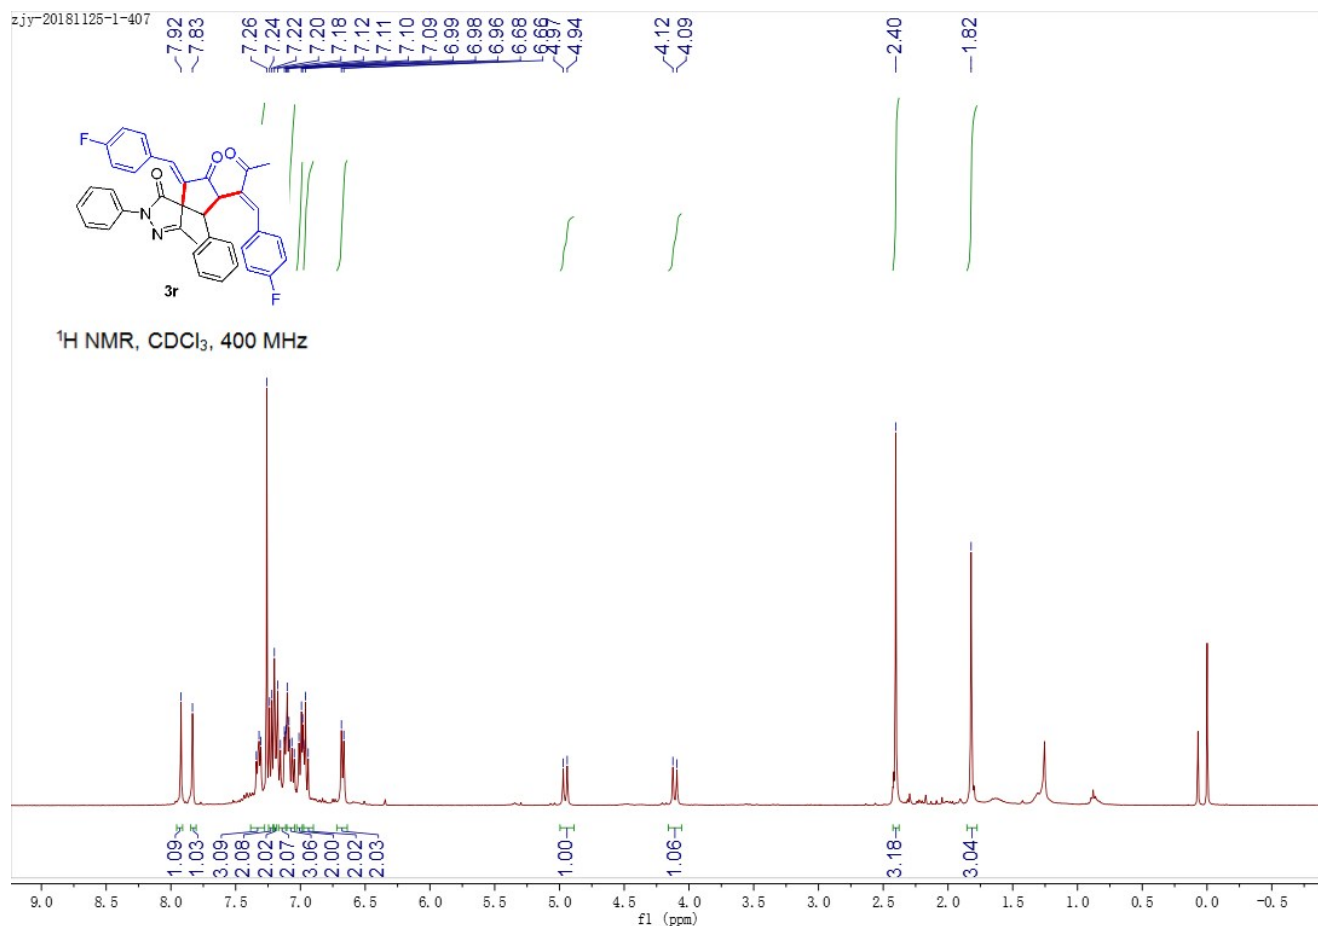

zjy-20181124-1-402  
C13CPD

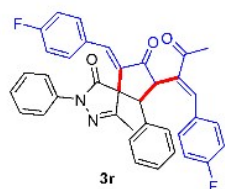

$^{13}\text{C}$  NMR,  $\text{CDCl}_3$ , 101 MHz

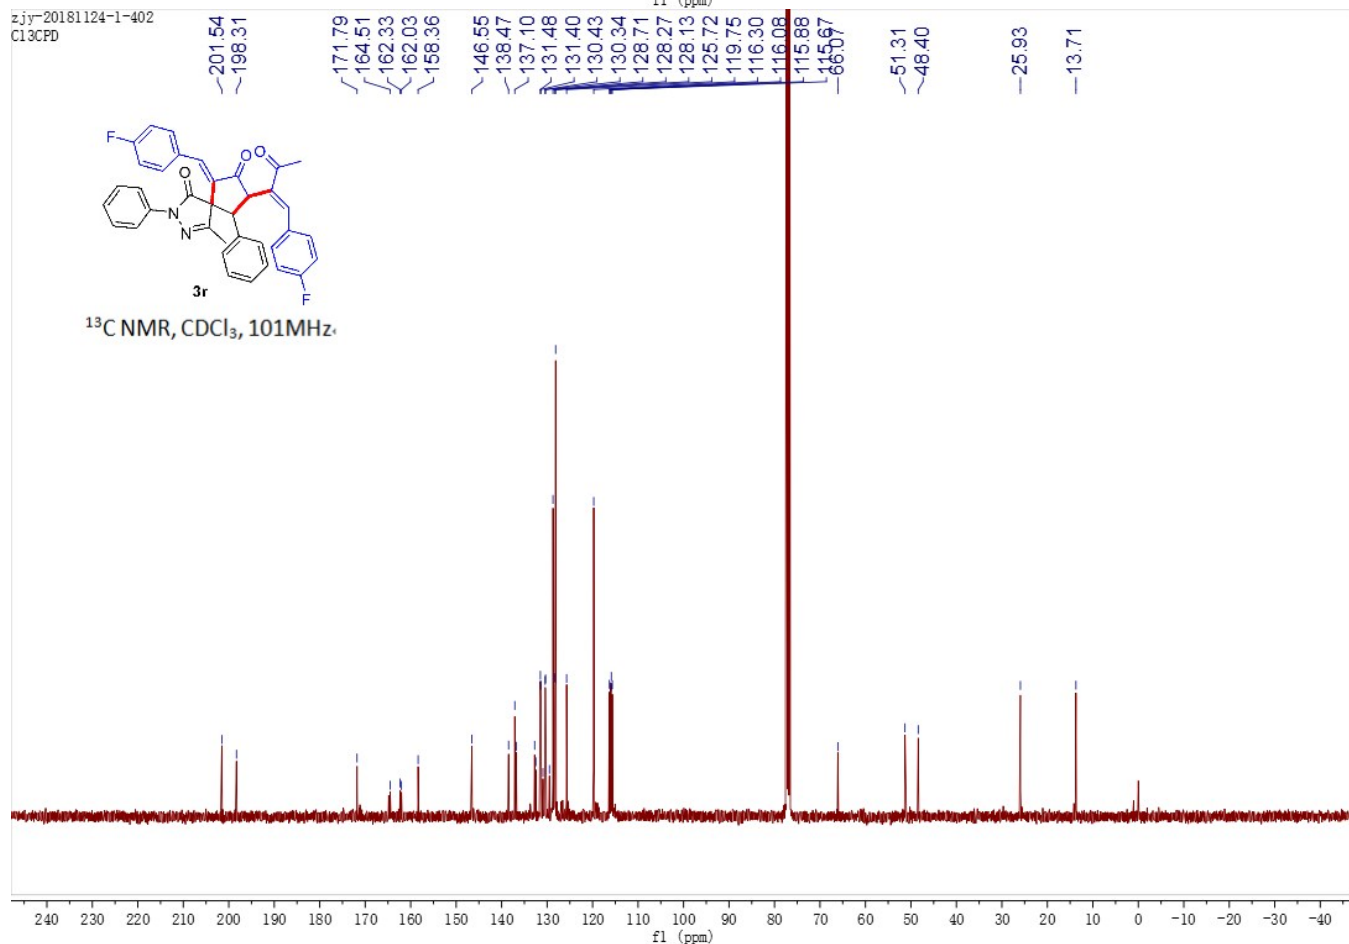

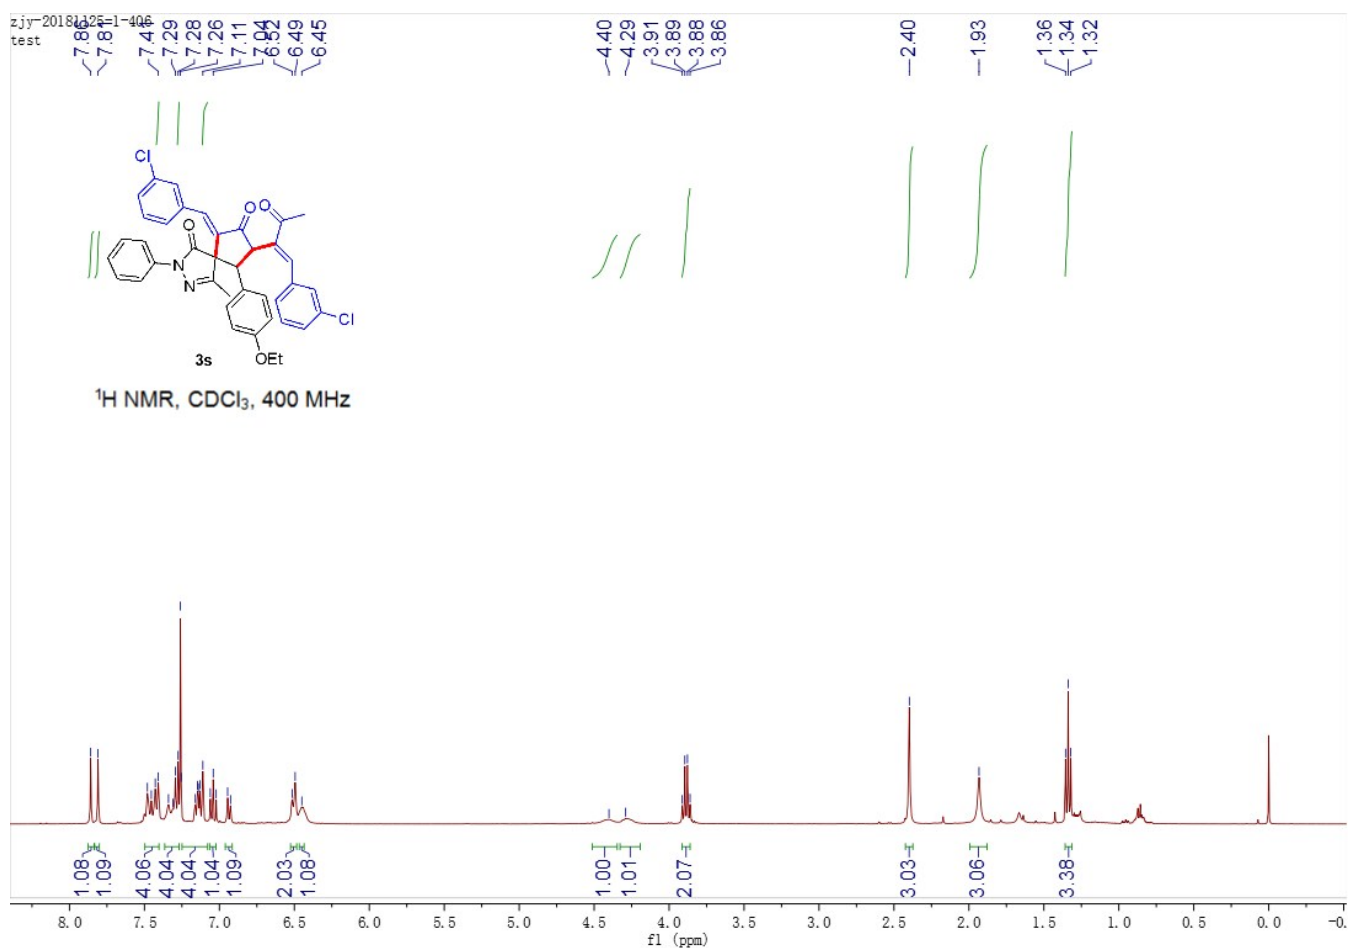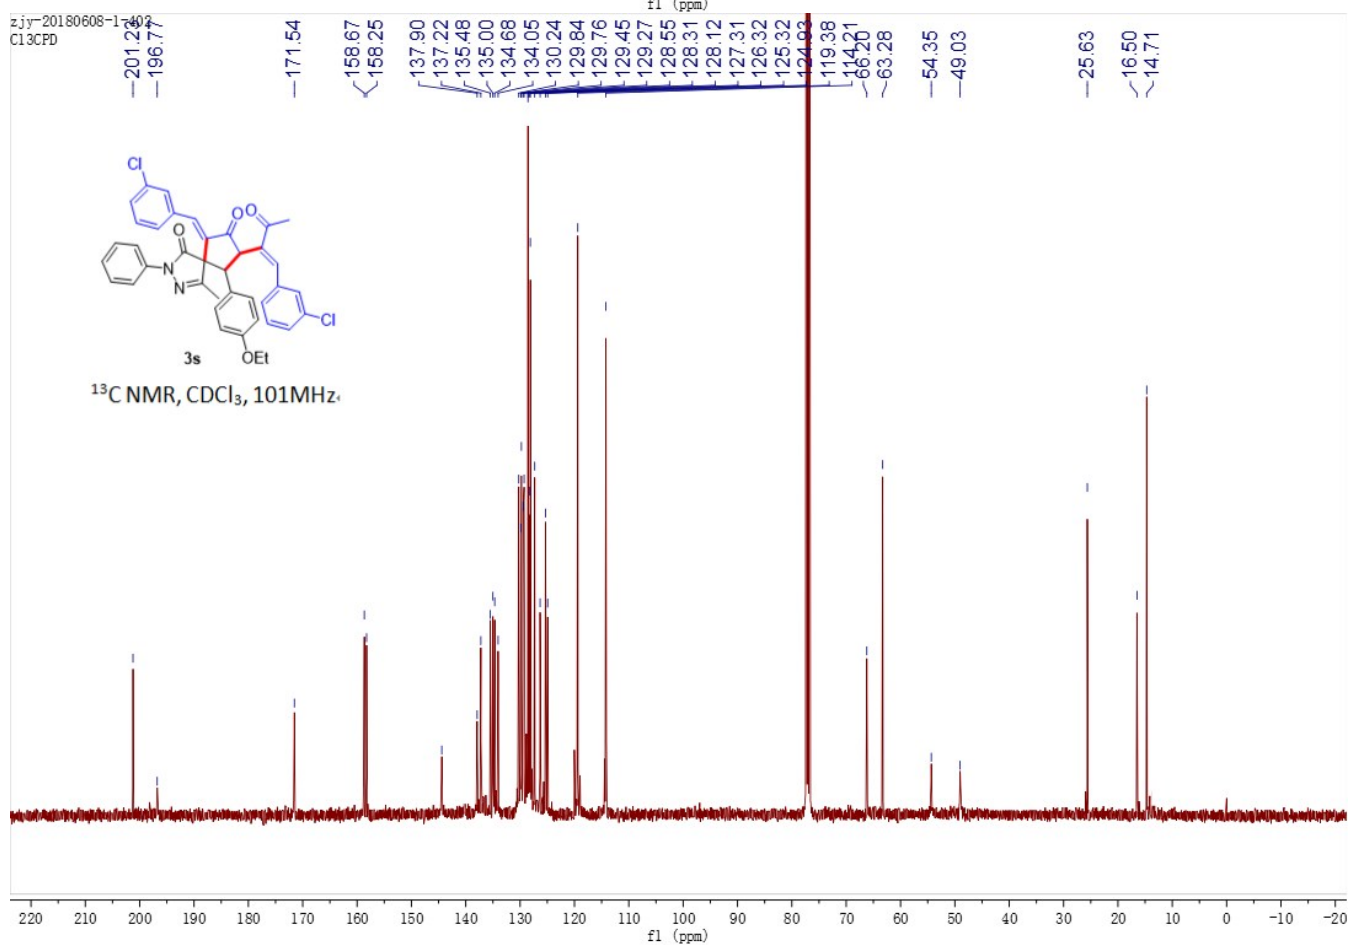

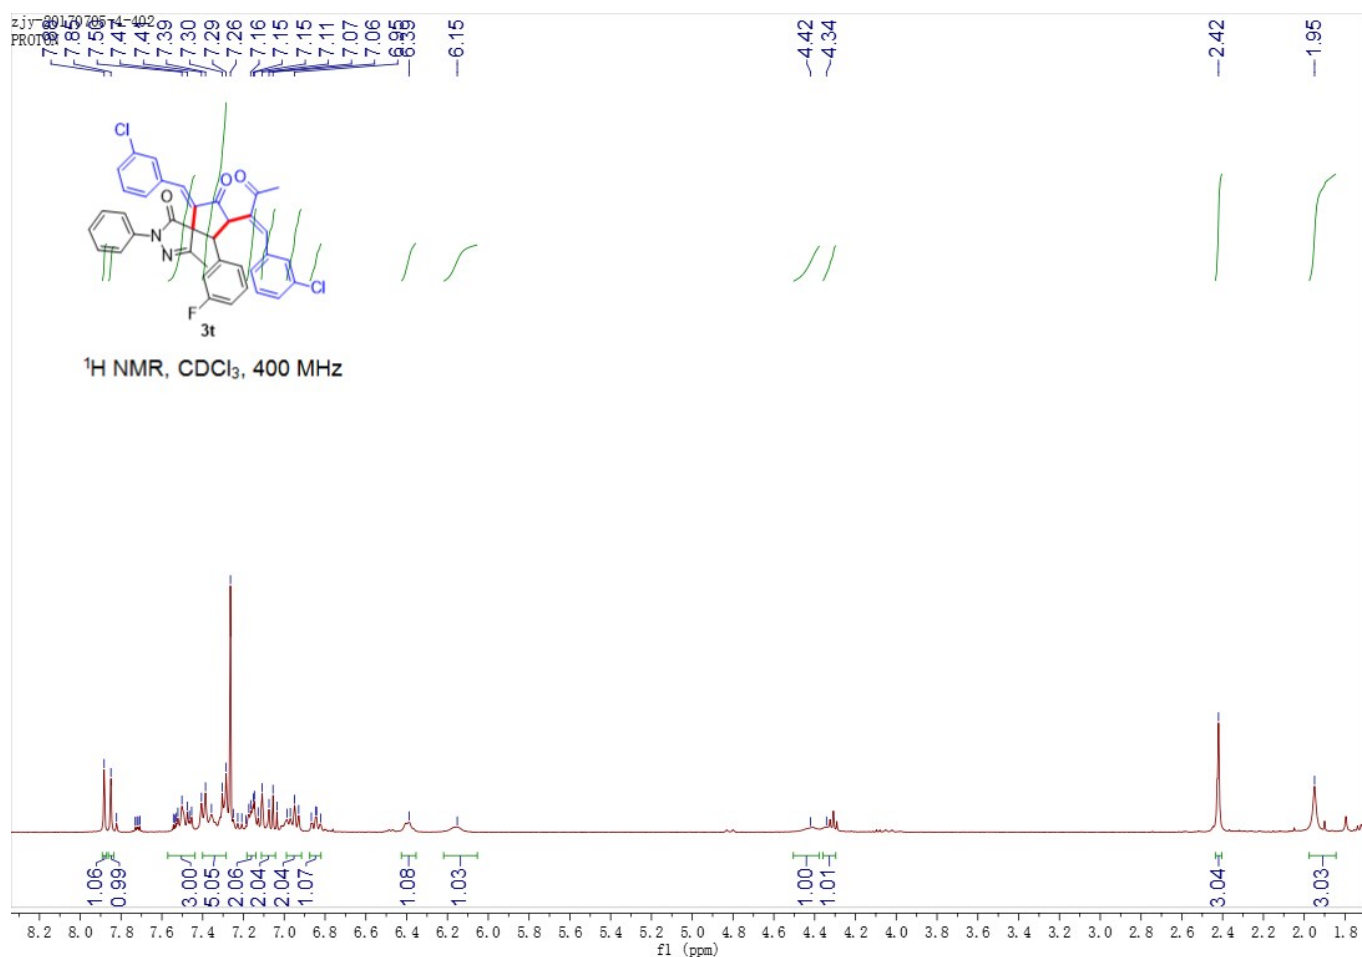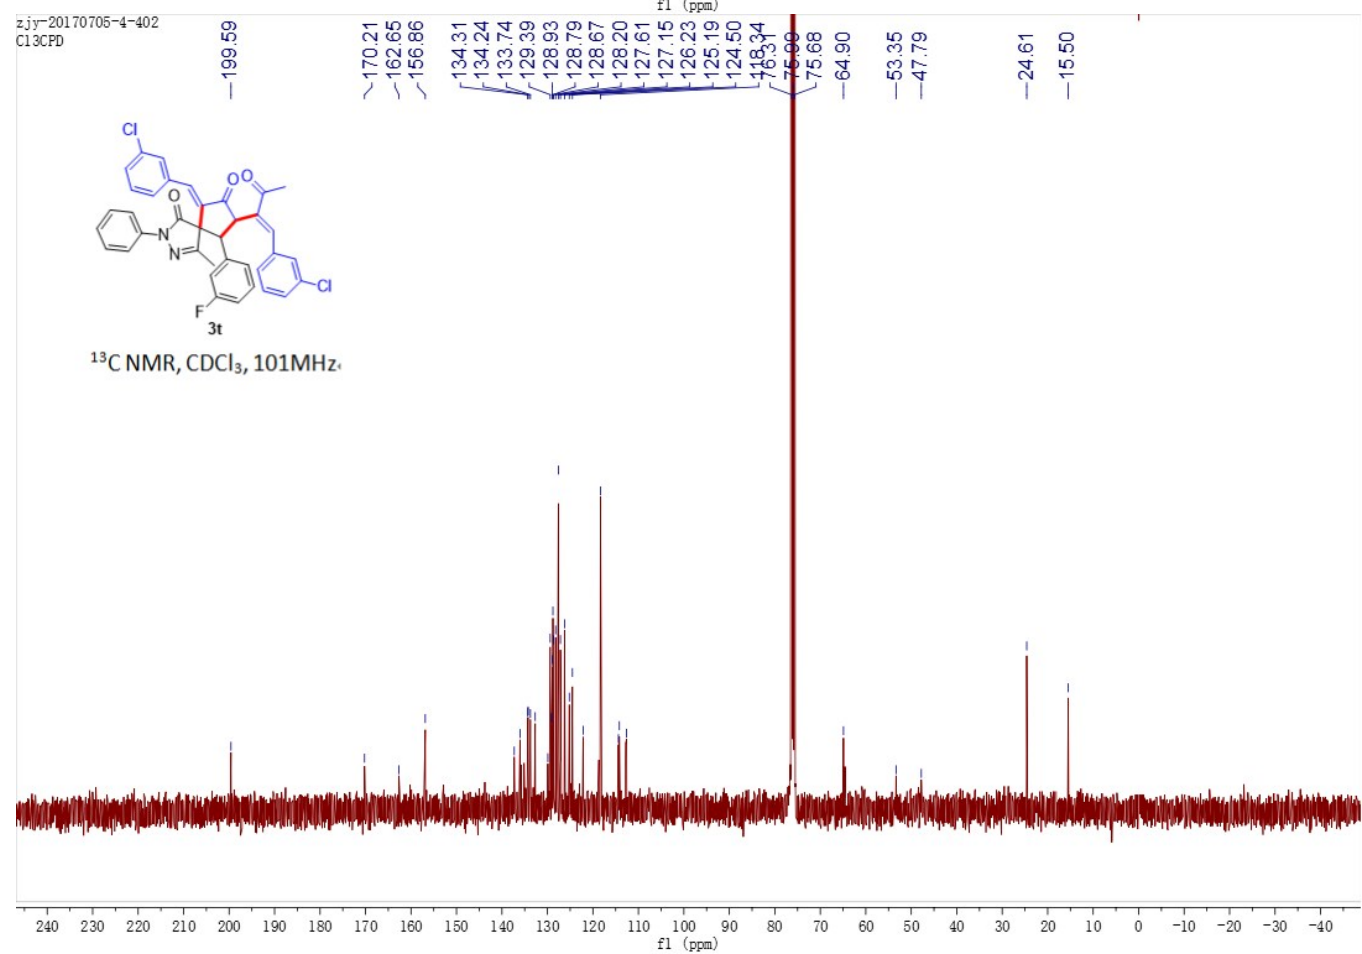

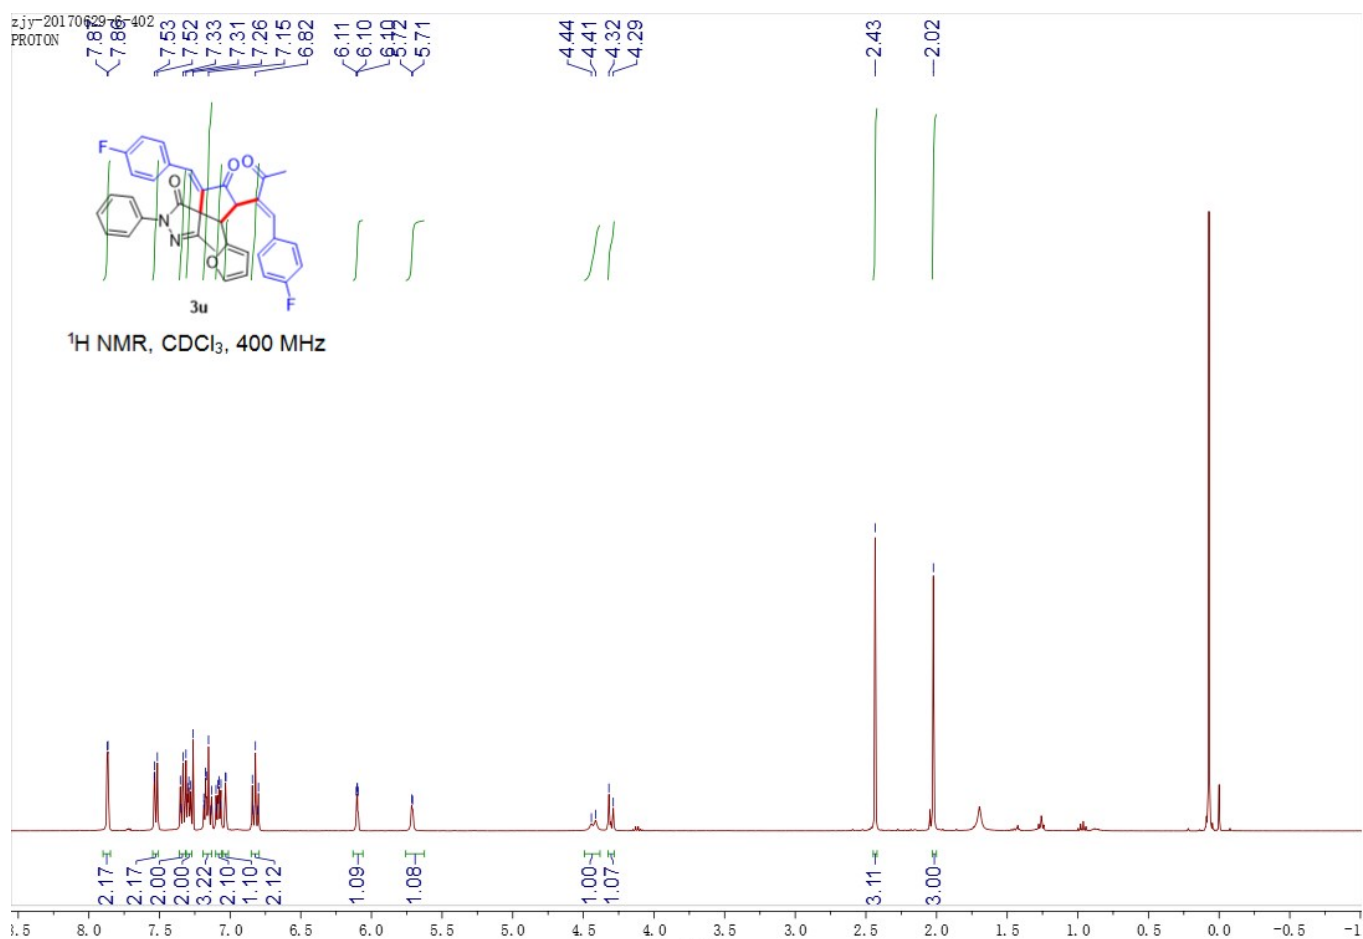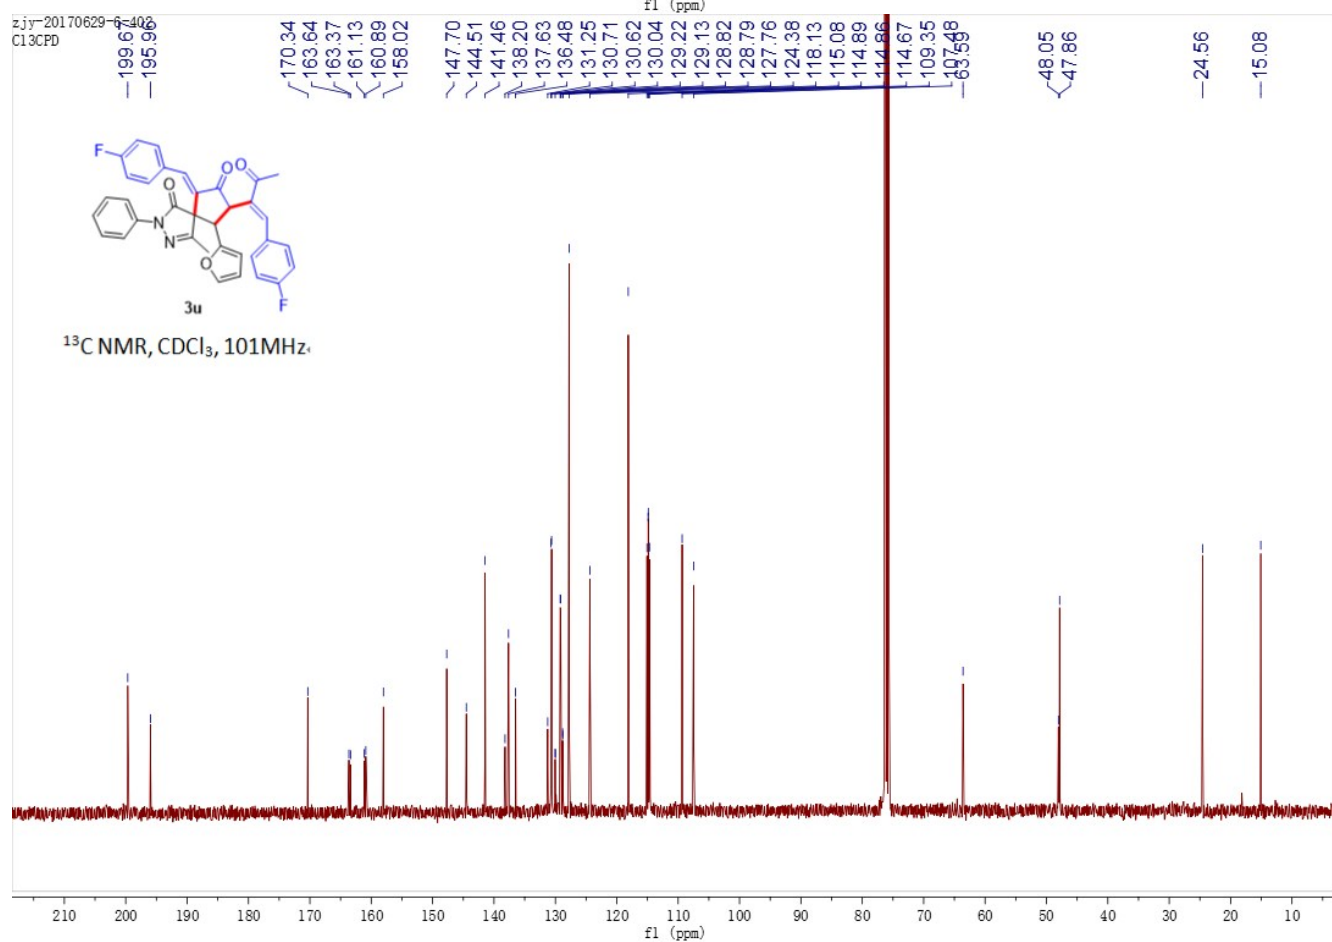



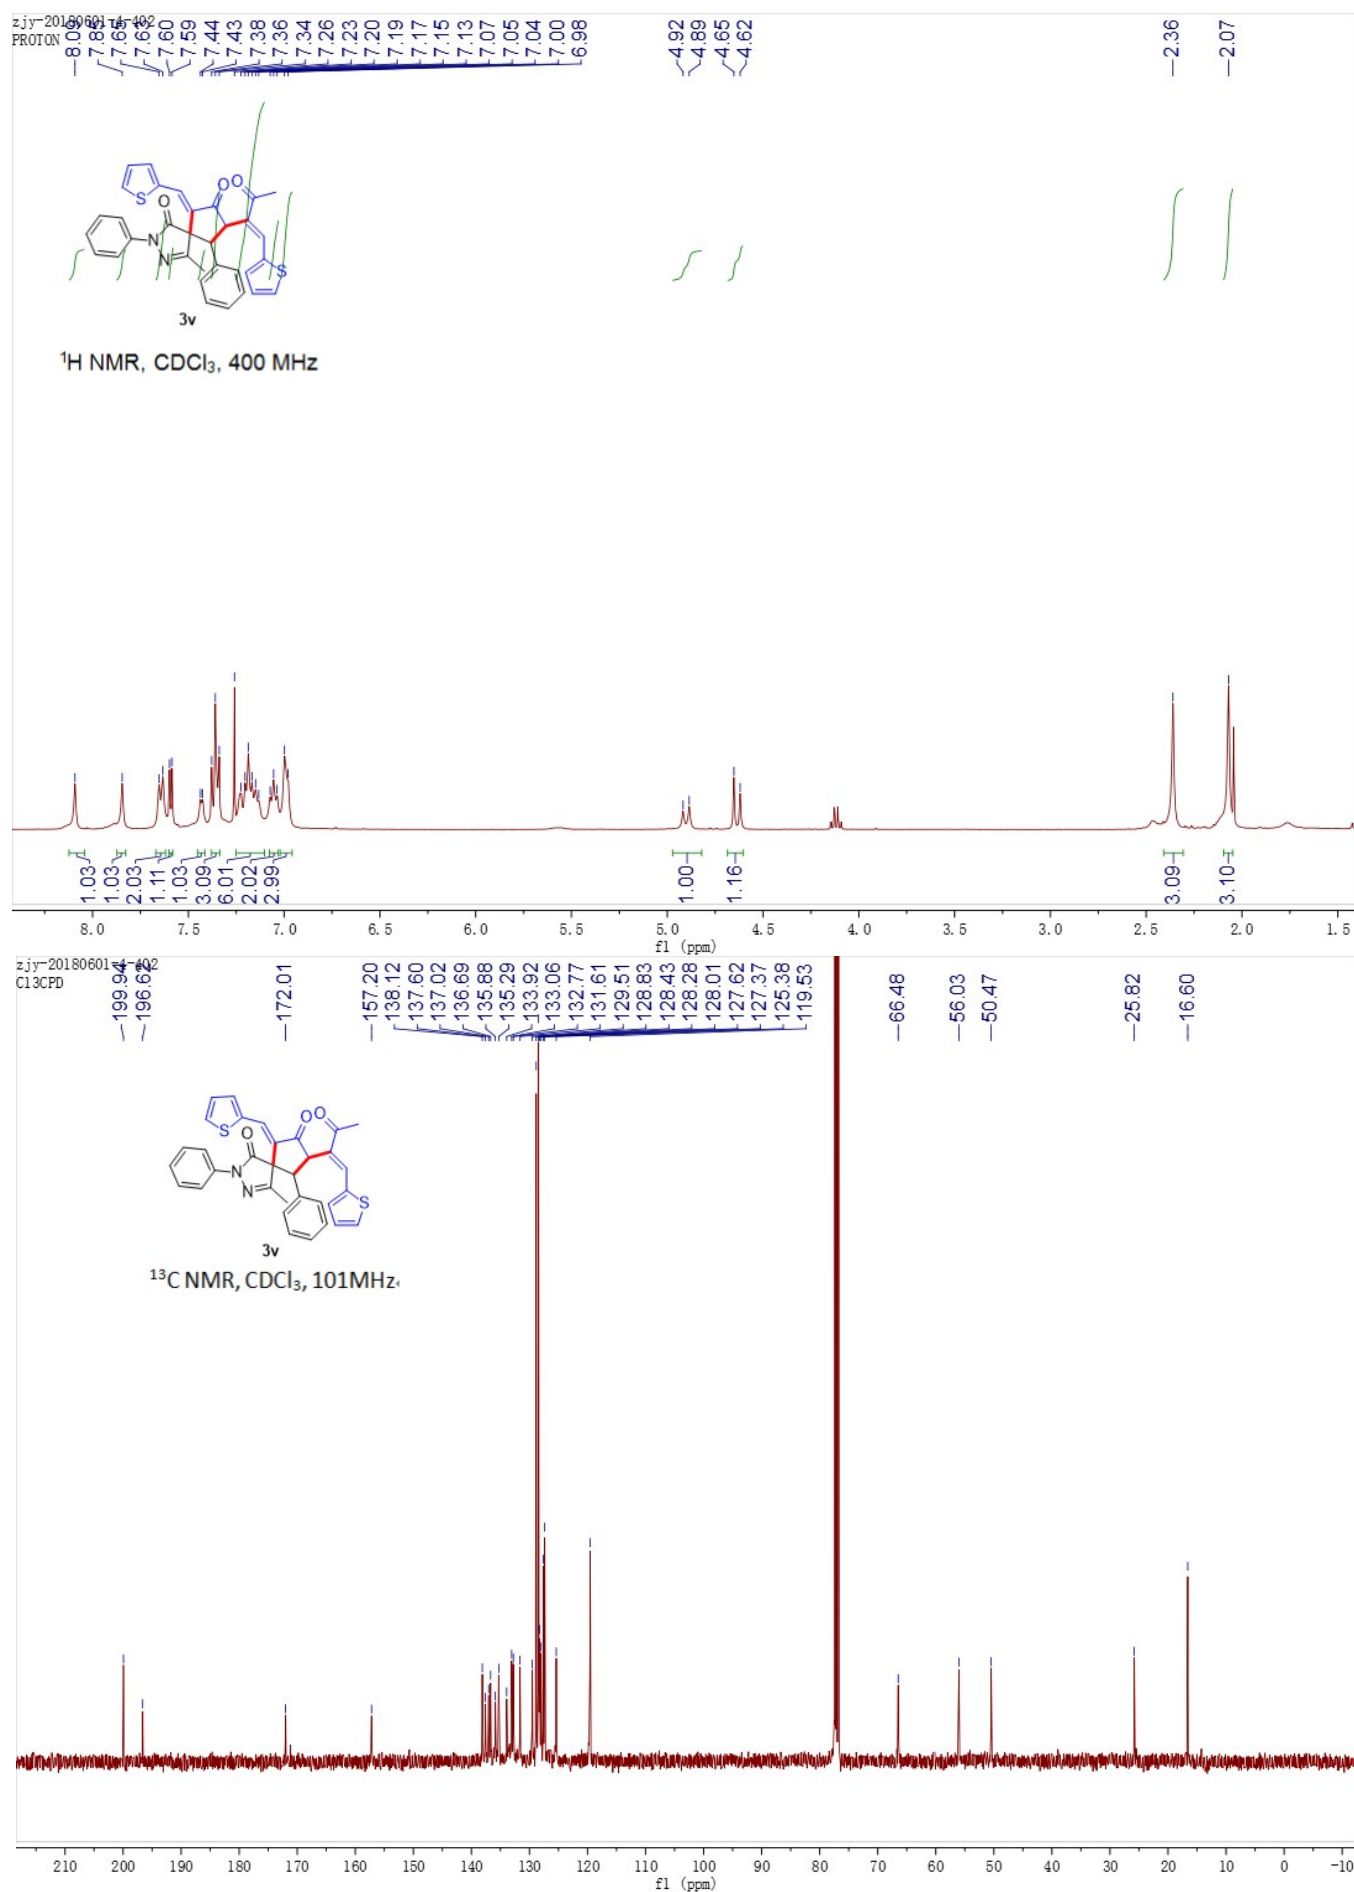

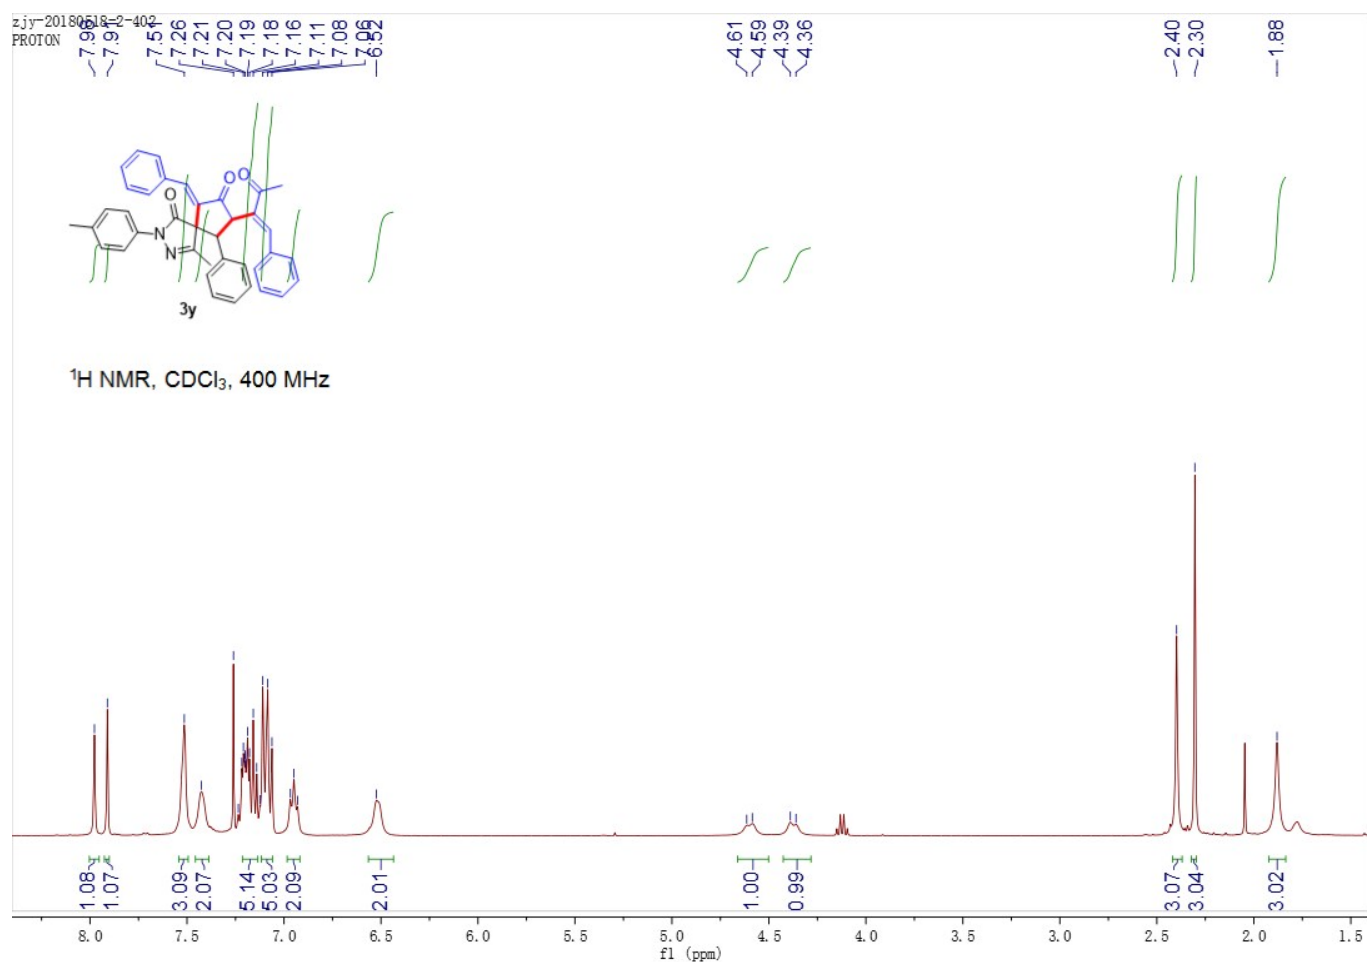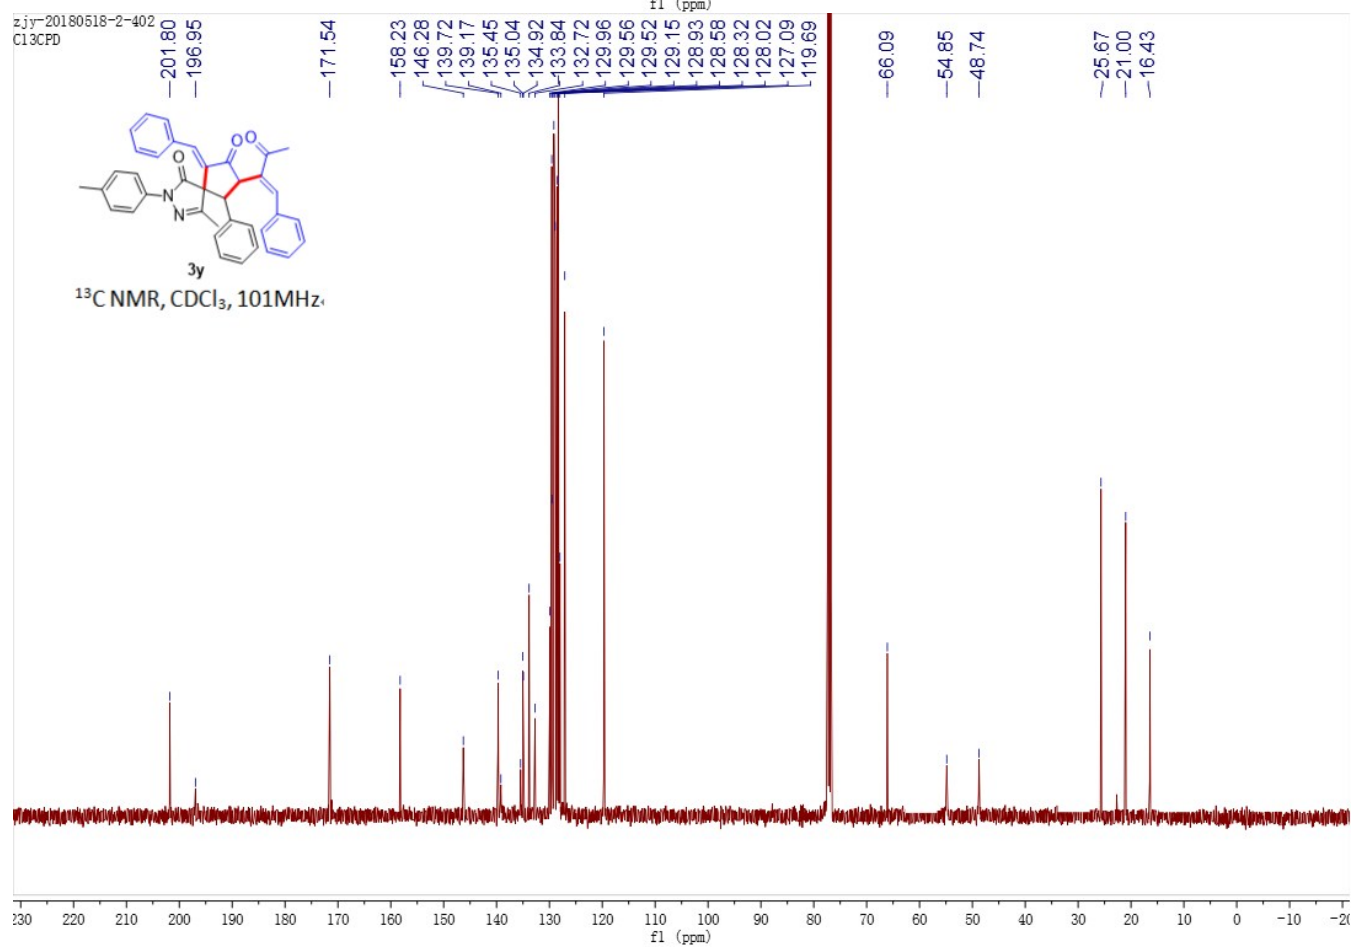



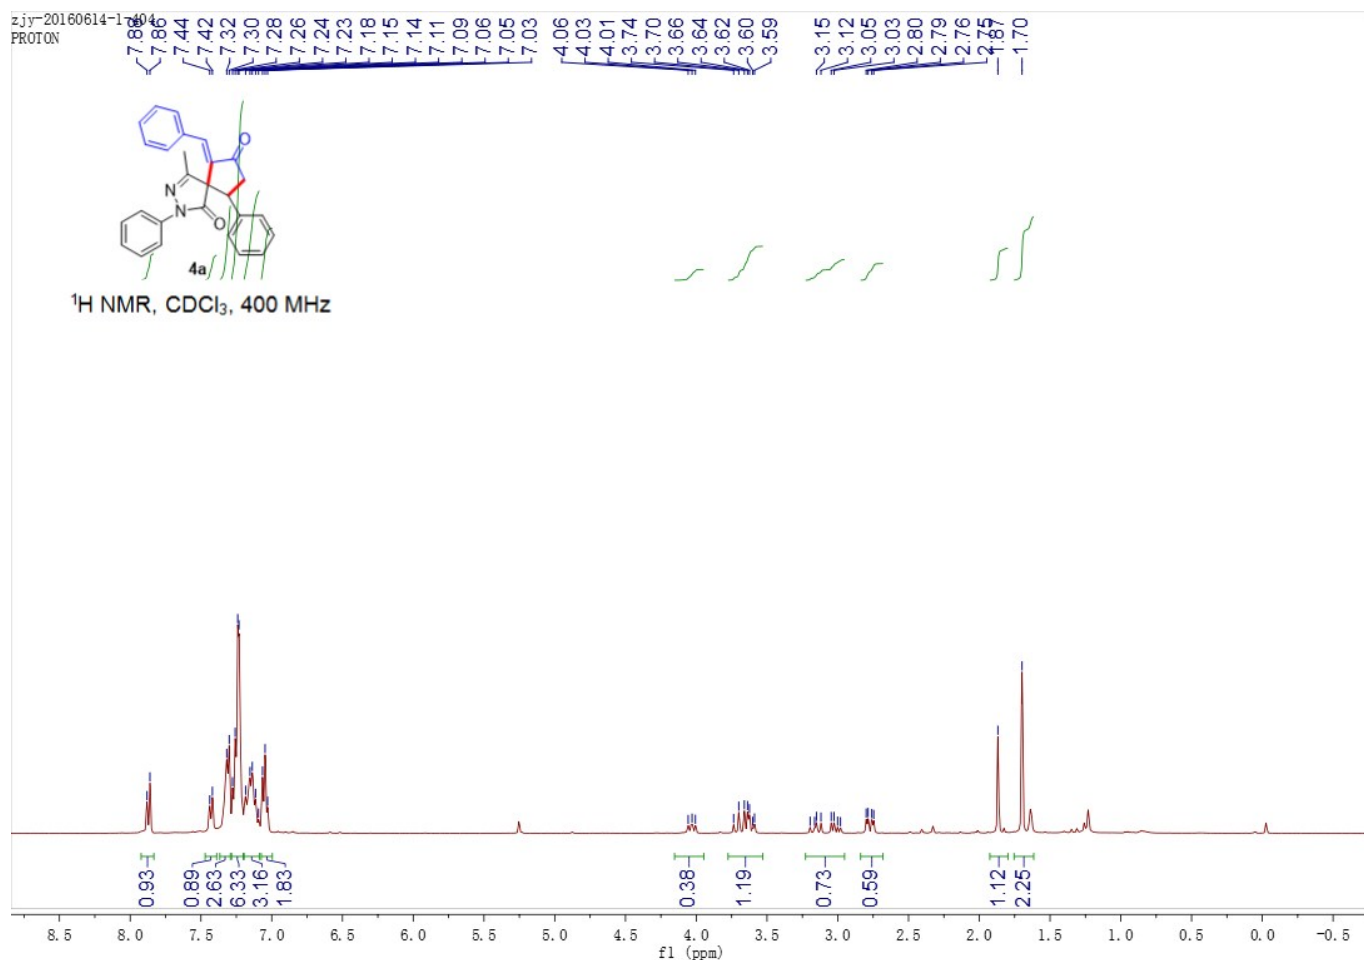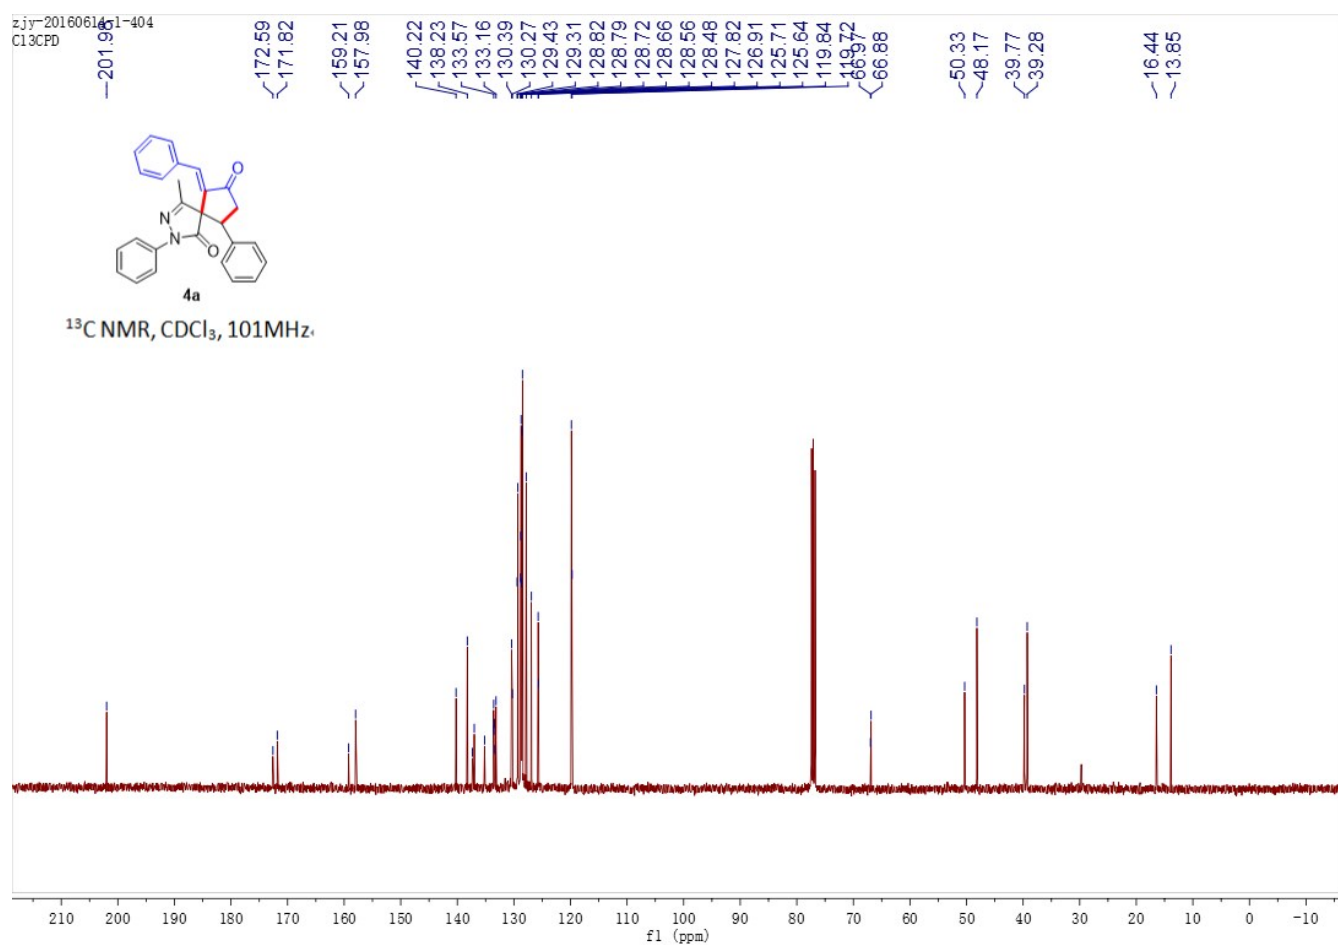

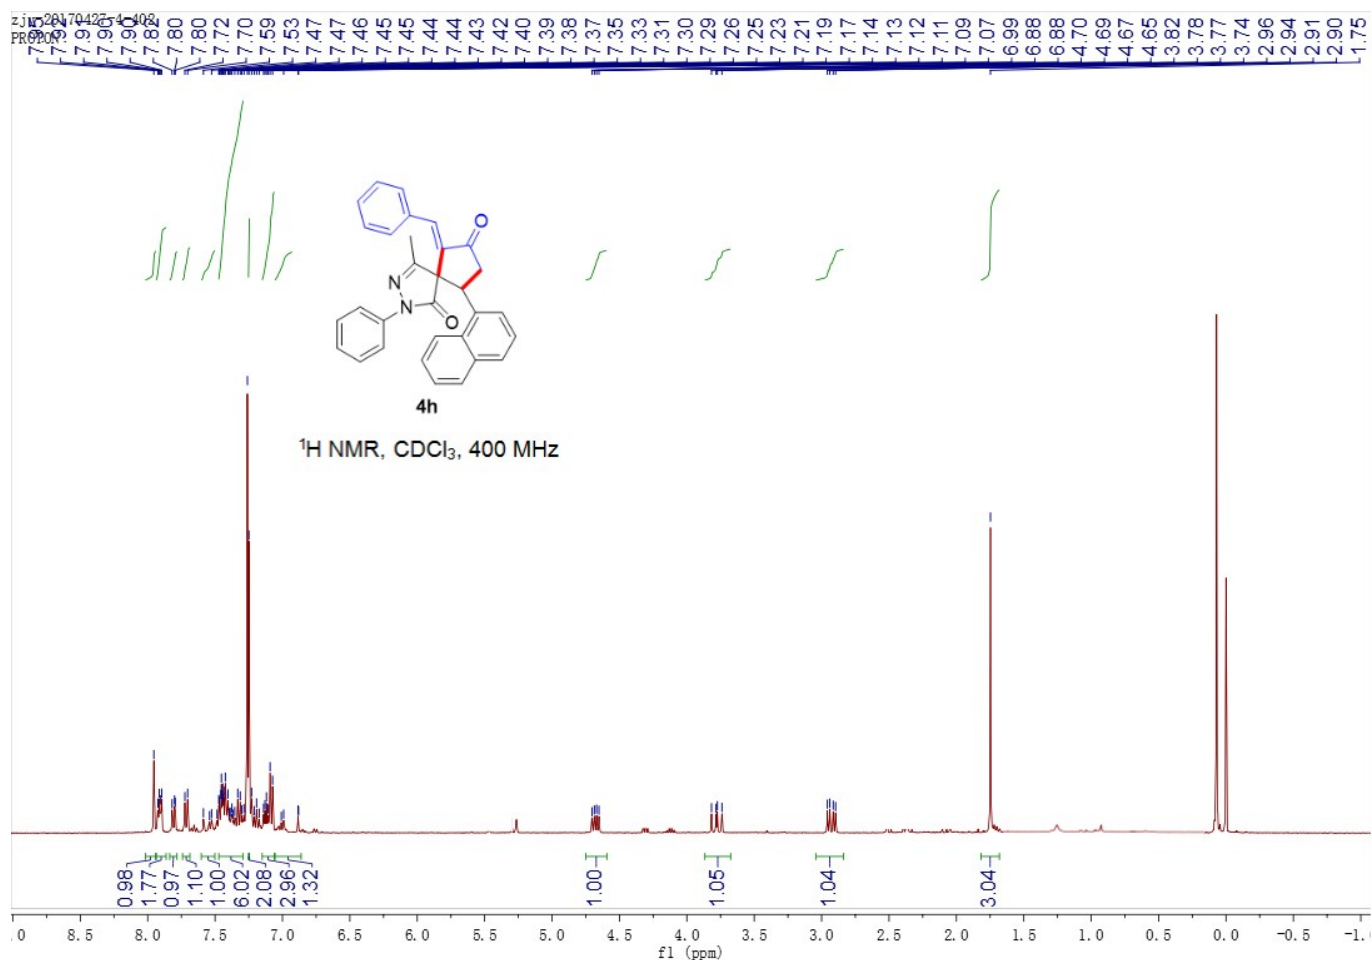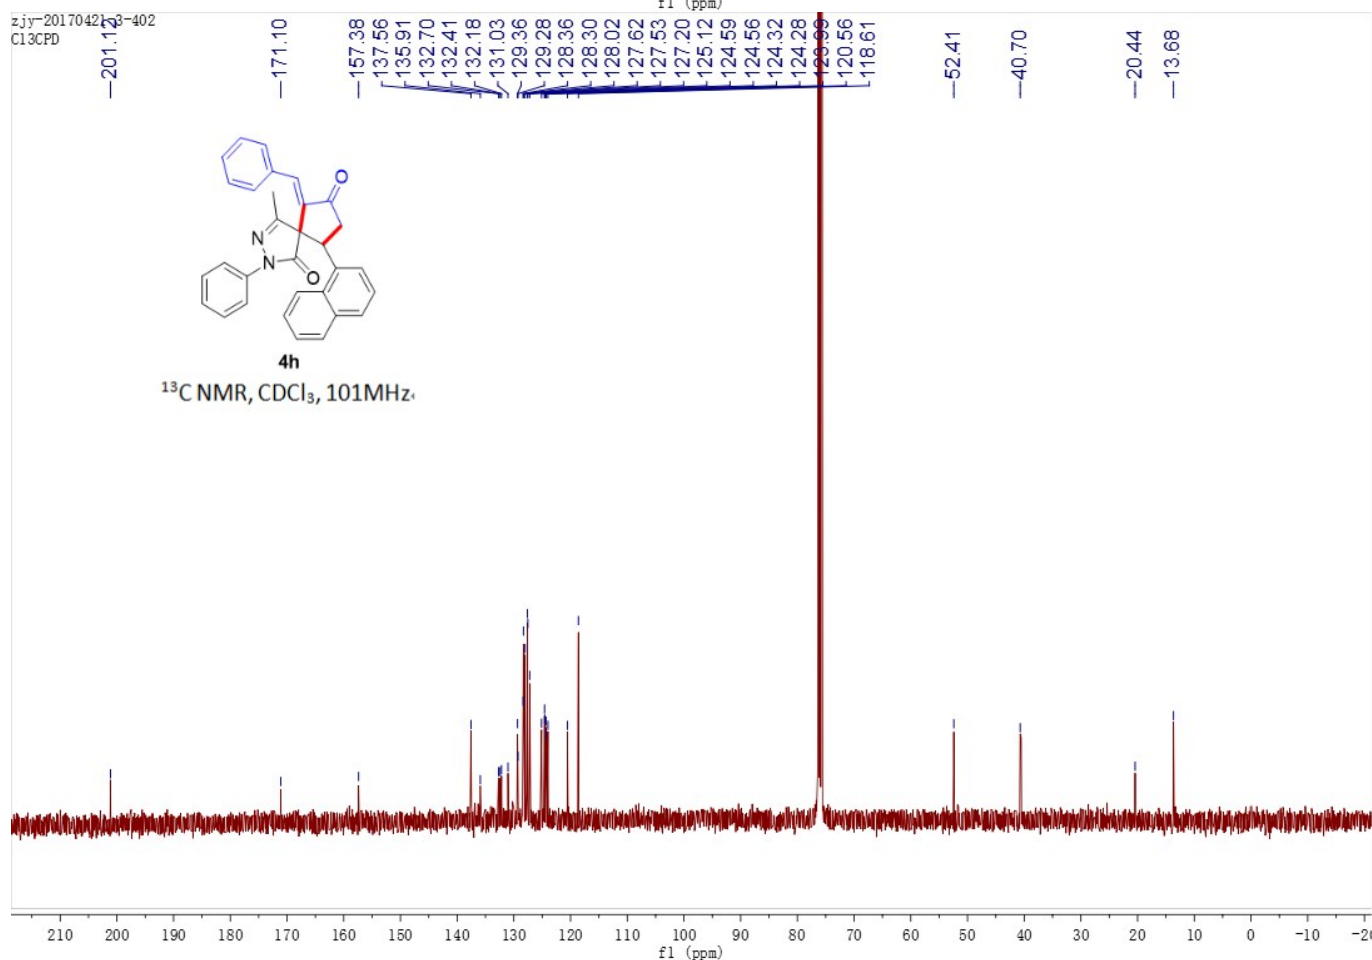

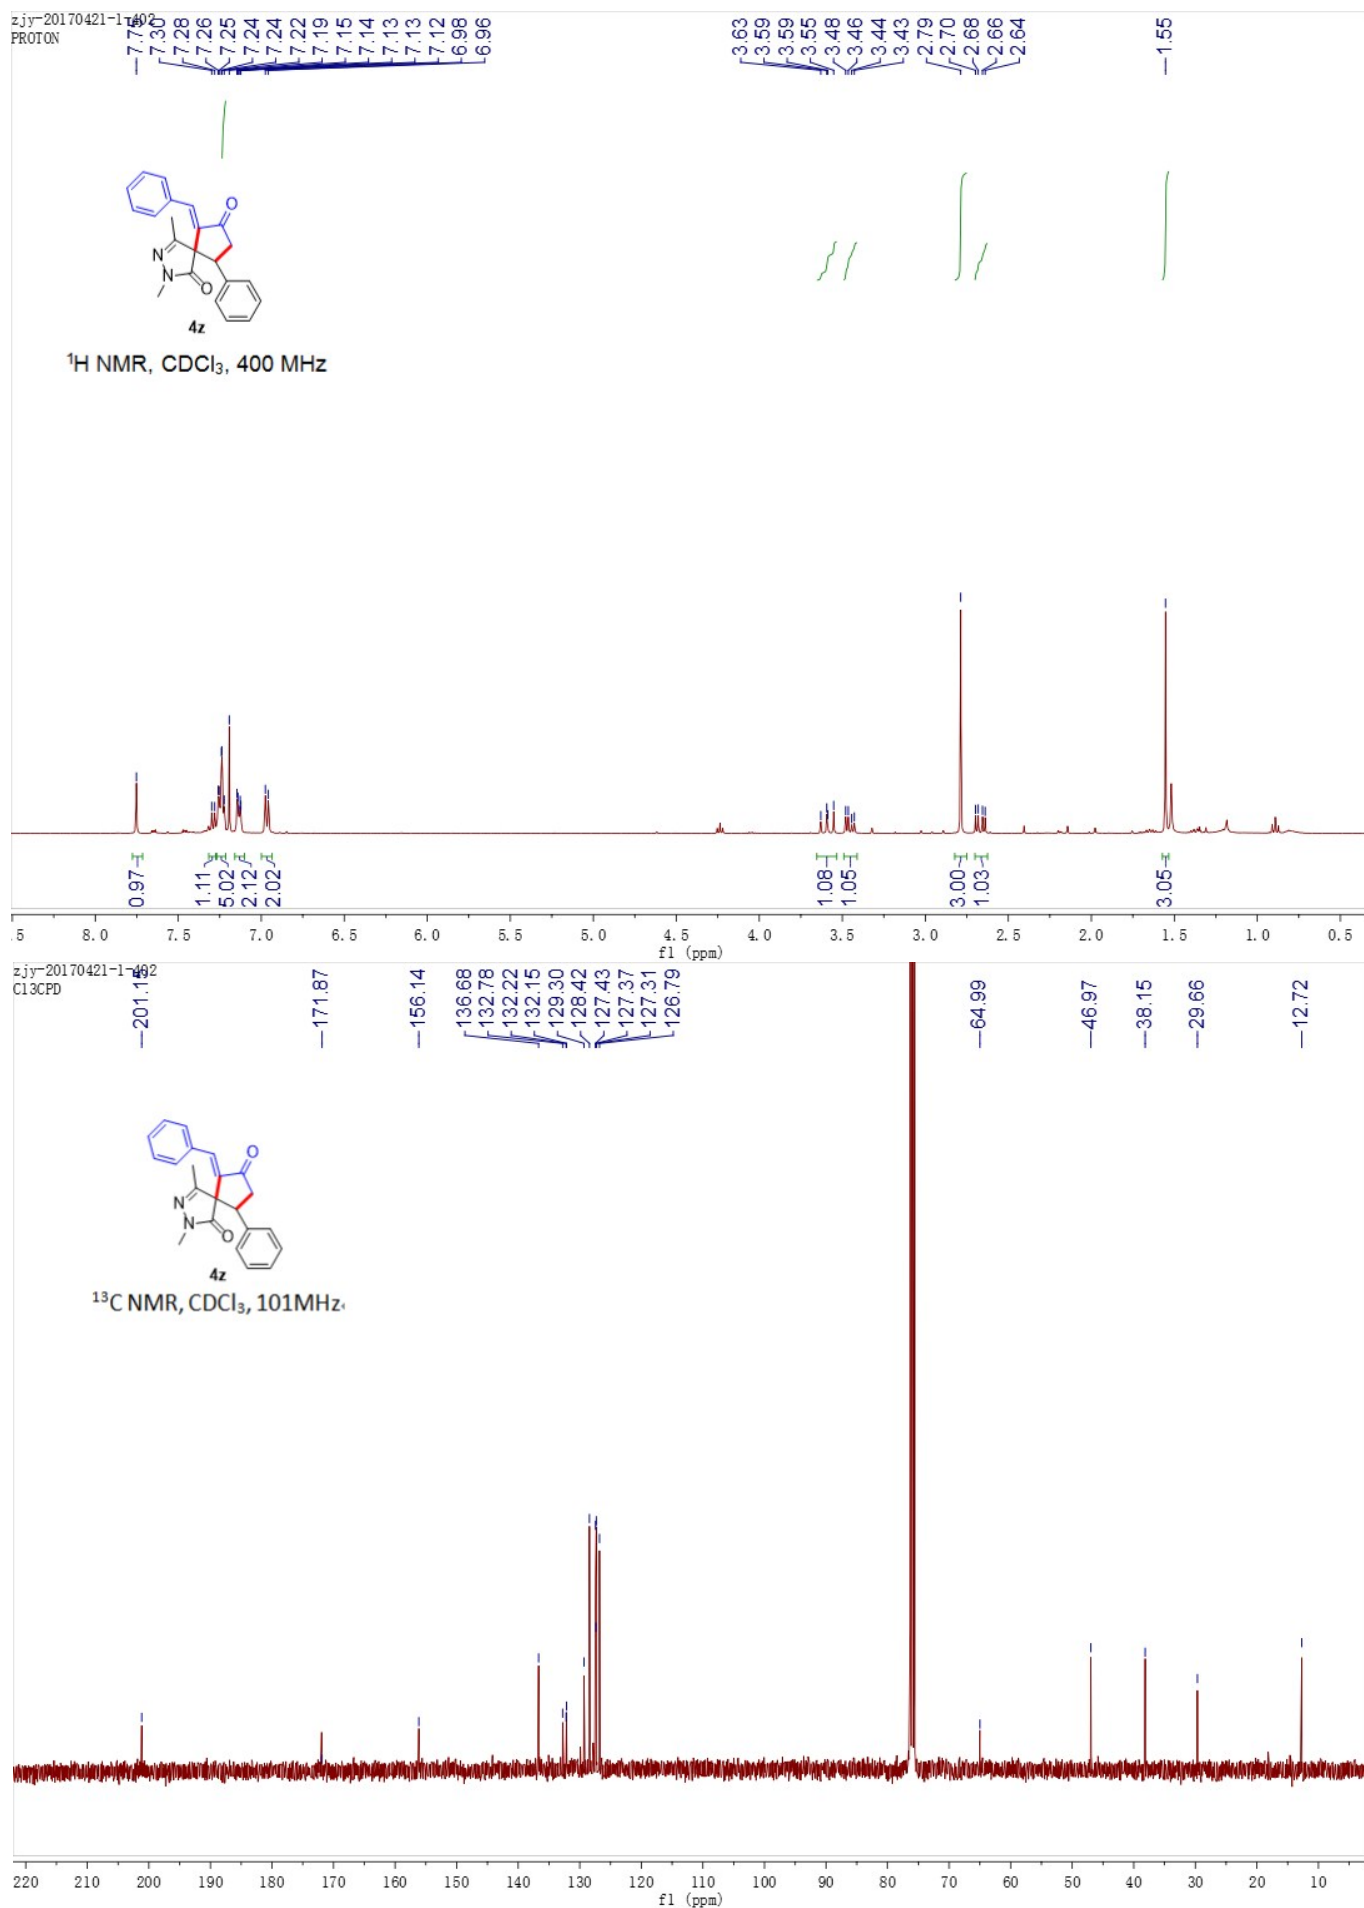

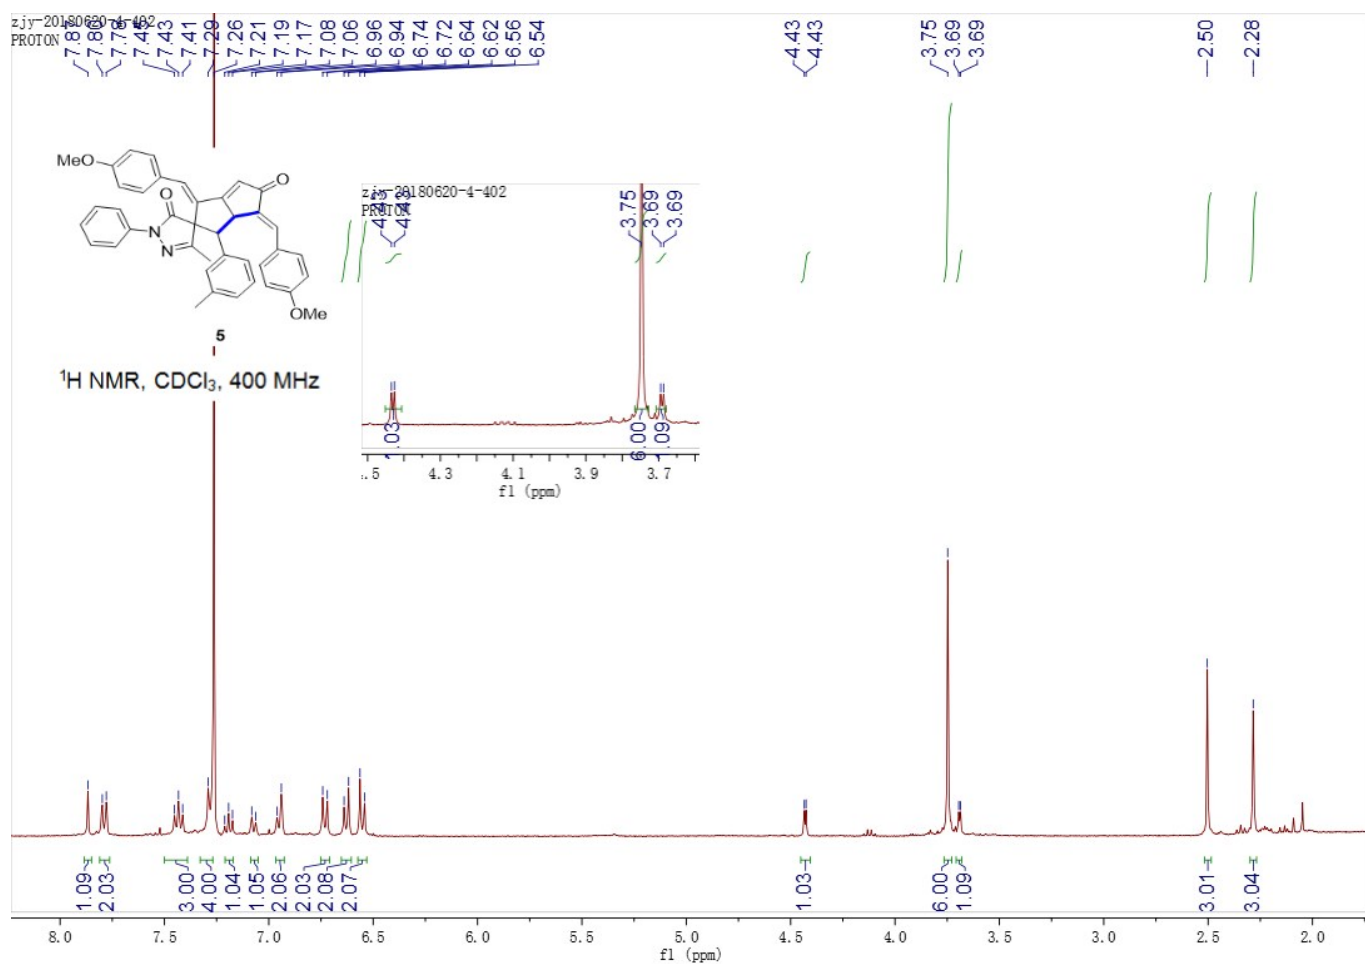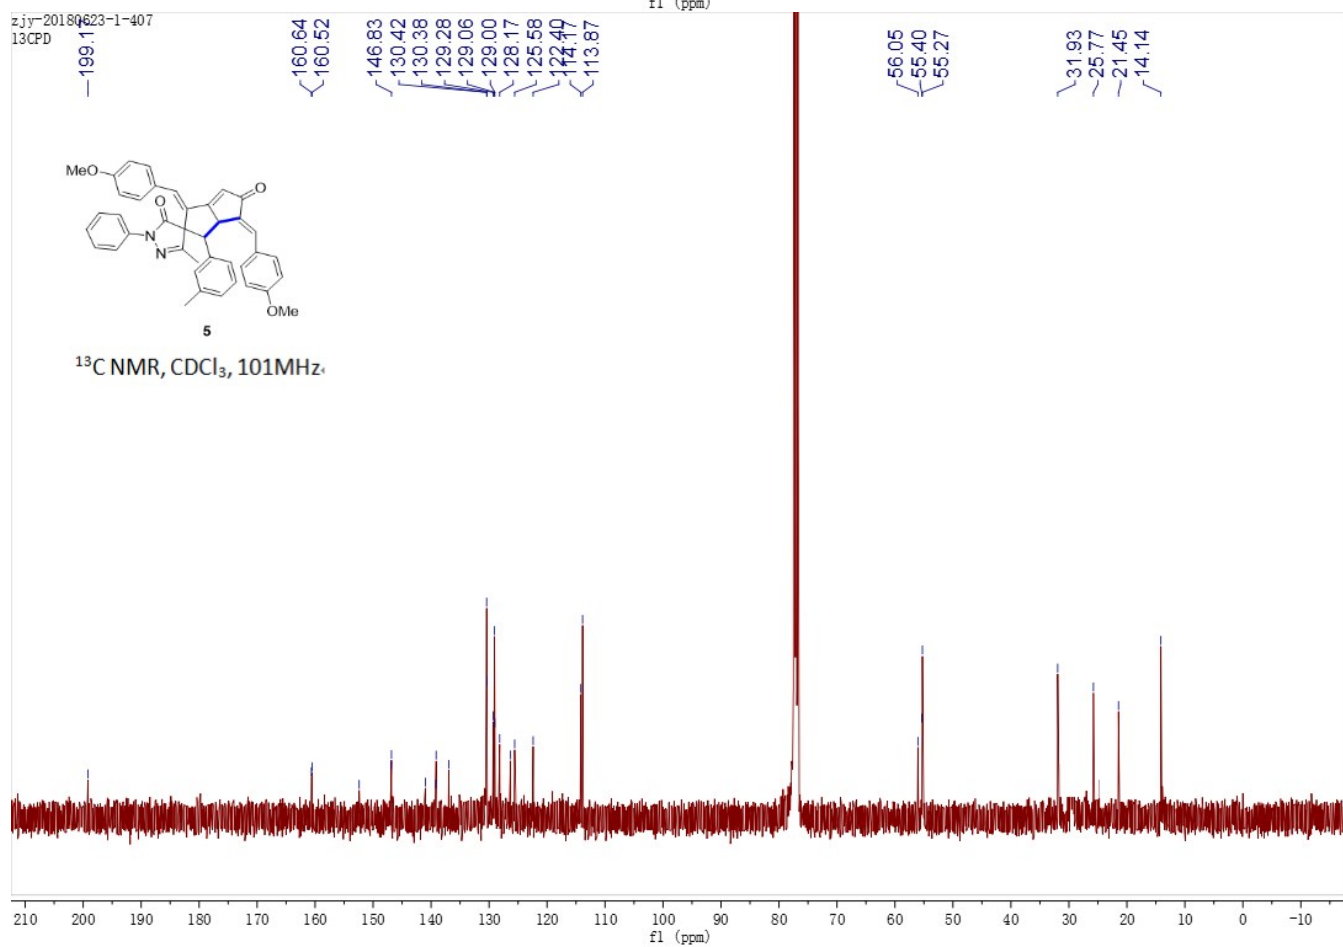

zjy-20170310-1-402  
PROTON

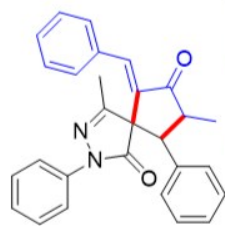

7

$^1\text{H}$  NMR,  $\text{CDCl}_3$ , 400 MHz

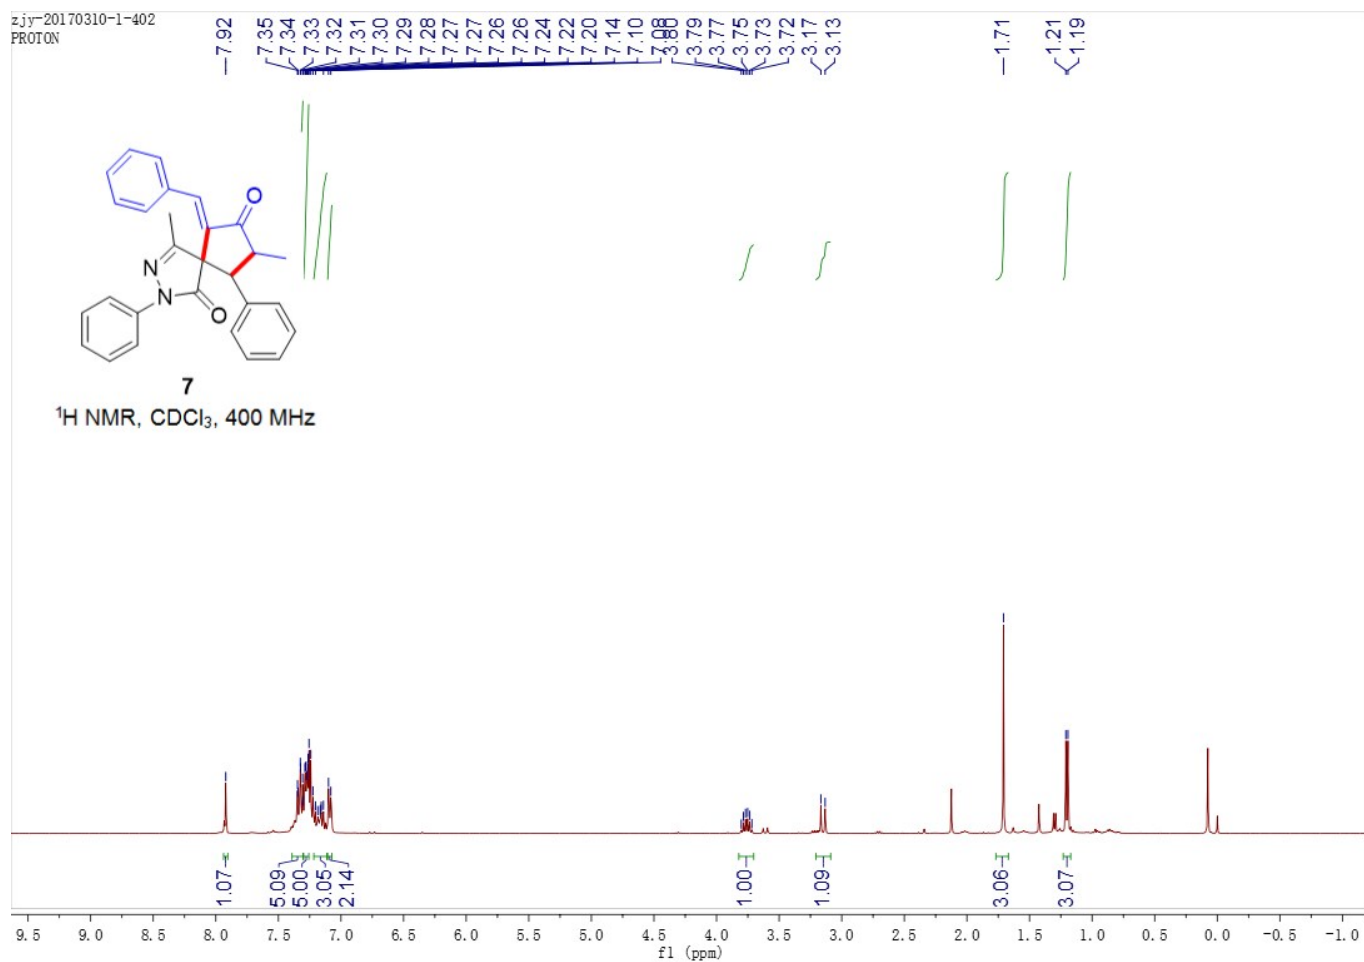

zjy-20170310-1-402  
C13CPD

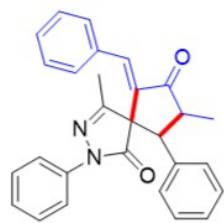

7

$^{13}\text{C}$  NMR,  $\text{CDCl}_3$ , 101MHz

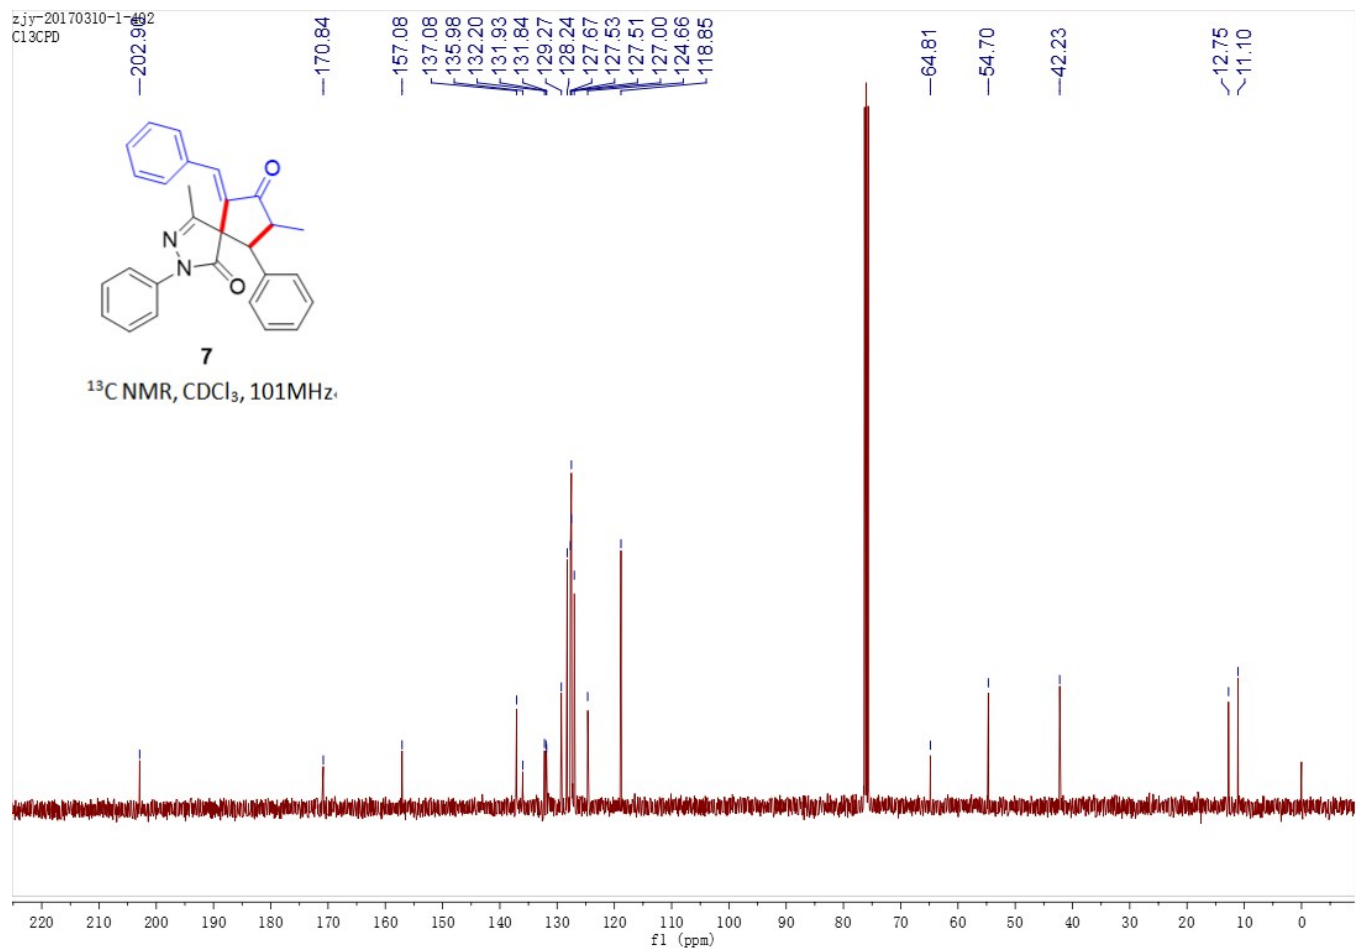

## General procedure for deuteration experiment

Under a nitrogen atmosphere, to a mixture of benzylidenepyrazolone **2f** (0.1 mmol, 1.0 equiv.), D<sub>2</sub>O (40.0 mg, 2.0 mmol, 20 equiv.) and DPPB (8.5 mg, 0.02 mmol, 20 mmol%) was added toluene (1 mL) *via* a syringe and allowed to stir for 5 min at 60°C. Ynones **1a** (31.7 mg, 0.22 mmol, 2.2 equiv.) was added and the reaction was allowed to stir for 36 h at 60°C. The reaction was monitored by TLC. After the reaction was completed, the reaction mixture was directly purified by flash column chromatograph (eluted with 5:1 petroleum ether/EtOAc) to afford the corresponding cycloaddition product **D-3f**.

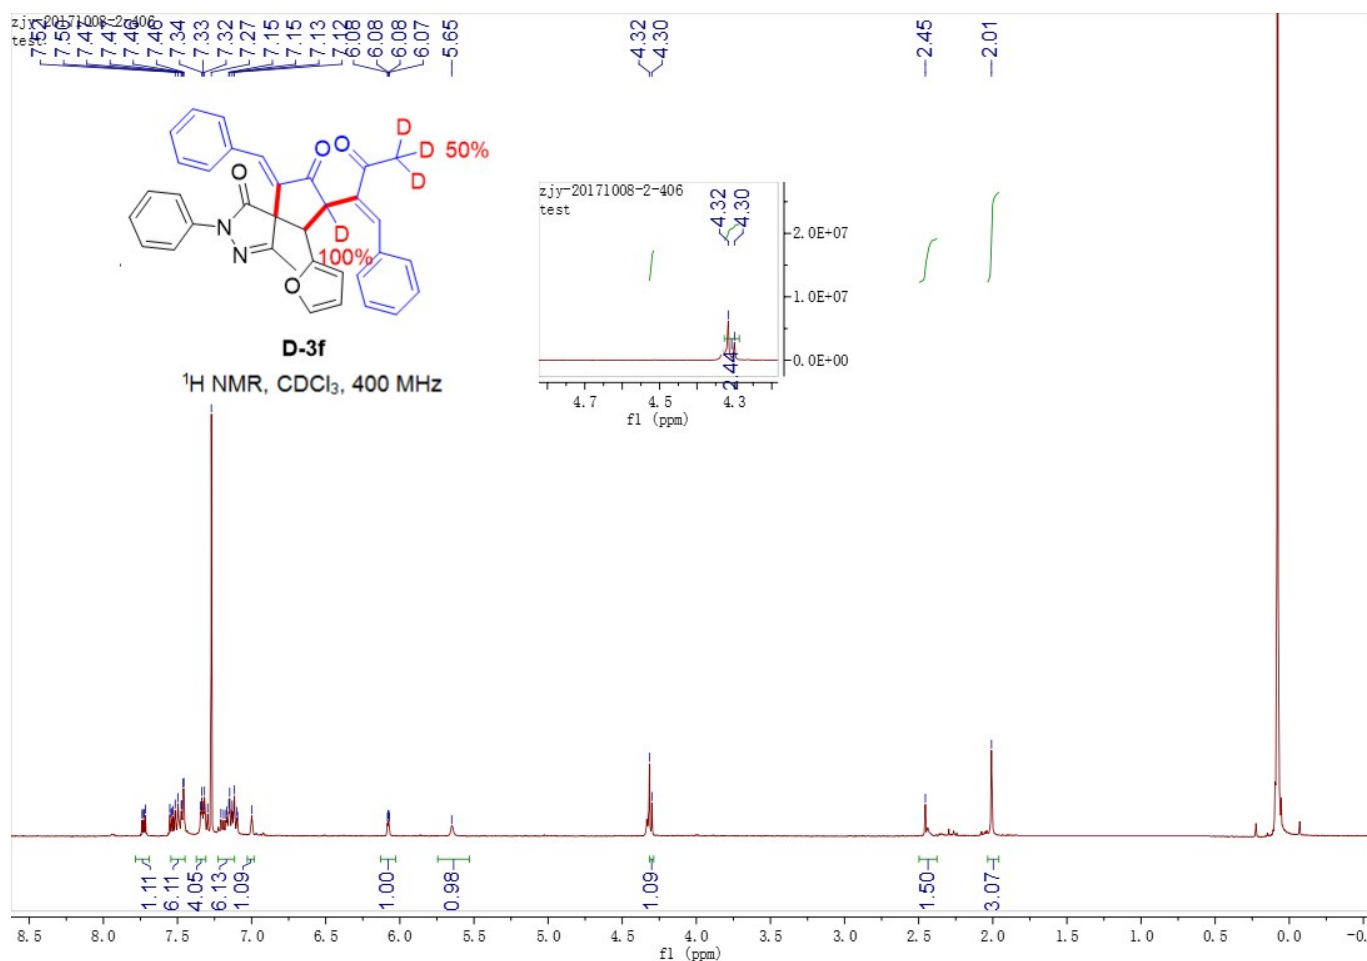

## X-ray crystallographic data of compound 3a

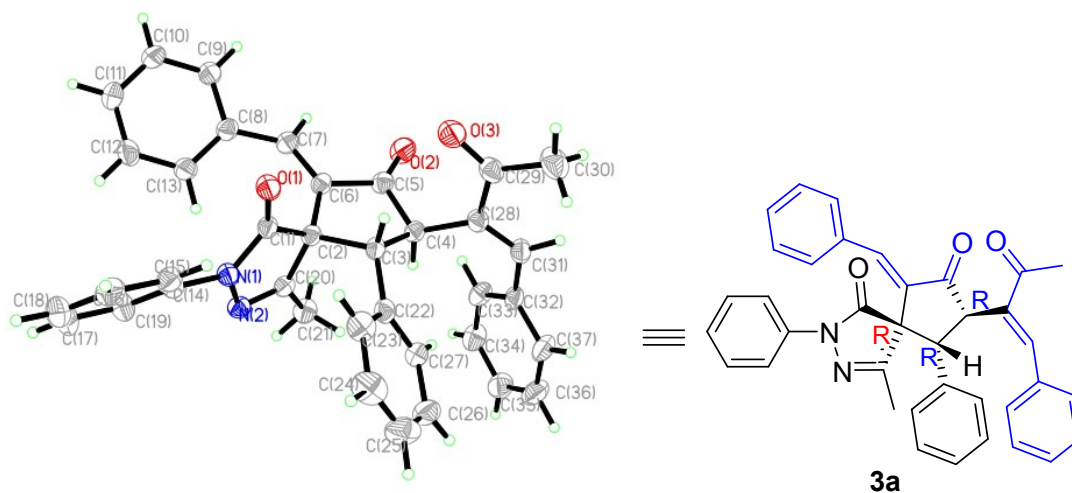

**Table S1.** Crystal data and structure refinement for compound **3a**

|                                 |                                                               |                       |
|---------------------------------|---------------------------------------------------------------|-----------------------|
| Name                            | Compound <b>3a</b>                                            |                       |
| Empirical formula               | C <sub>37</sub> H <sub>30</sub> N <sub>2</sub> O <sub>3</sub> |                       |
| Formula weight                  | 550.63                                                        |                       |
| Temperature                     | 113(2) K                                                      |                       |
| Wavelength                      | 0.71073 Å                                                     |                       |
| Crystal system, space group     | Monoclinic, P2(1)/n                                           |                       |
| Unit cell dimensions            | a = 9.4914(7) Å                                               | alpha = 90 deg.       |
|                                 | b = 13.1578(9) Å                                              | beta = 90.676(2) deg. |
|                                 | c = 24.0997(19) Å                                             | gamma = 90 deg.       |
| Volume                          | 3009.5(4) Å <sup>3</sup>                                      |                       |
| Z, Calculated density           | 4, 1.215 Mg/m <sup>3</sup>                                    |                       |
| Absorption coefficient          | 0.077 mm <sup>-1</sup>                                        |                       |
| F(000)                          | 1160                                                          |                       |
| Crystal size                    | 0.20 x 0.18 x 0.12 mm                                         |                       |
| Theta range for data collection | 3.10 to 27.49°                                                |                       |



|                                   |                                             |
|-----------------------------------|---------------------------------------------|
| Limiting indices                  | -12<=h<=12, -17<=k<=17, -31<=l<=31          |
| Reflections collected / unique    | 37829 / 6865 [R(int) = 0.0365]              |
| Completeness to theta = 27.92     | 99.5 %                                      |
| Absorption correction             | Semi-empirical from equivalents             |
| Max. and min. transmission        | 0.9908 and 0.9847                           |
| Refinement method                 | Full-matrix least-squares on F <sup>2</sup> |
| Data / restraints / parameters    | 6865 / 0 / 381                              |
| Goodness-of-fit on F <sup>2</sup> | 1.008                                       |
| Final R indices [I>2sigma(I)]     | R1 = 0.0418, wR2 = 0.1195                   |
| R indices (all data)              | R1 = 0.0632, wR2 = 0.1302                   |
| Largest diff. peak and hole       | 0.219 d -0.162 e.Å <sup>-3</sup>            |



## X-ray crystallographic data of compound 4h

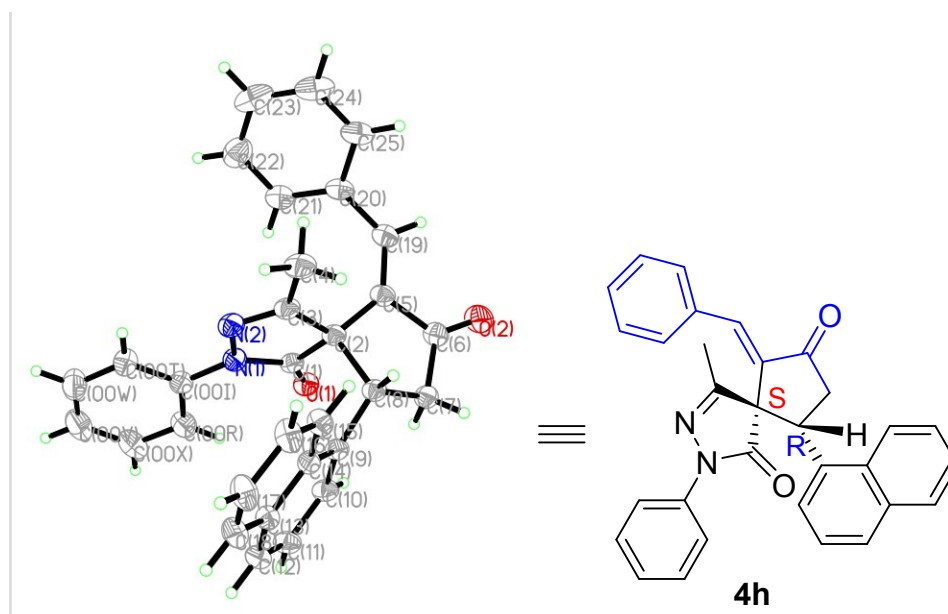

**Table S2** Crystal data and structure refinement for compound **4h**

| Name                                | Compound <b>4h</b>                                            |
|-------------------------------------|---------------------------------------------------------------|
| Empirical formula                   | C <sub>31</sub> H <sub>24</sub> N <sub>2</sub> O <sub>2</sub> |
| Formula weight                      | 456.52                                                        |
| Temperature/K                       | 294.15                                                        |
| Crystal system                      | monoclinic                                                    |
| Space group                         | I2/a                                                          |
| a/Å                                 | 14.50950(10)                                                  |
| b/Å                                 | 15.42510(10)                                                  |
| c/Å                                 | 22.00390(10)                                                  |
| $\alpha$ /°                         | 90                                                            |
| $\beta$ /°                          | 107.7770(10)                                                  |
| $\gamma$ /°                         | 90                                                            |
| Volume/Å <sup>3</sup>               | 4689.56(6)                                                    |
| Z                                   | 8                                                             |
| $\rho_{\text{calc}}/\text{cm}^{-3}$ | 1.293                                                         |

|                                                |                                                              |
|------------------------------------------------|--------------------------------------------------------------|
| $\mu/\text{mm}^{-1}$                           | 0.641                                                        |
| F(000)                                         | 1920.0                                                       |
| Crystal size/ $\text{mm}^3$                    | $0.28 \times 0.26 \times 0.24$                               |
| Index ranges                                   | $-17 \leq h \leq 18, -16 \leq k \leq 19, -28 \leq l \leq 26$ |
| Reflections collected                          | 39753                                                        |
| Independent reflections                        | 5030 [Rint = 0.0153, Rsigma = 0.0079]                        |
| Data/restraints/parameters                     | 5030/0/318                                                   |
| Goodness-of-fit on $F^2$                       | 1.035                                                        |
| Final R indexes [ $I \geq 2\sigma(I)$ ]        | R1 = 0.0363, wR2 = 0.1001                                    |
| Final R indexes [all data]                     | R1 = 0.0375, wR2 = 0.1010                                    |
| Largest diff. peak/hole / $e \text{ \AA}^{-3}$ | 0.19/-0.14                                                   |

## References:

- [1] J. P. Hopewell, J. E. D. Martins, T. C. Johnson, J. Godfrey and M. Wills, *Org. Biomol. Chem.* 2012, **10**, 134.
- [2] Q. Chen, J. Liang, S. Wang, D. Wang and R. Wang, *Chem. Commun.* 2013, **49**, 1657.
- [3] P. J. Murphy and H. Boeckemeier, *Science of Synthesis* 2007, **31b**, 2057.
